# Supplementary material for: p75 Neurotrophin Receptor Shapes the Dynamics of Adult Hippocampal Neurogenesis in Alzheimer's Disease
Source: Research Square preprint supplement (doi:10.21203/rs.3.rs-7790527/v1), 2025-10-22
Supplement: Supplementary file 1 [file 5df24e32543f42e78dbeee88.xlsx]

## Sheet: Up & Down Regulated genes
Gene_ID	logFC	logCPM	LR	PValue	FDR
Ngfr	2.85393	2.27878	85.761	2.03054e-20	2.81738e-16
Med1	0.76706	6.98693	45.3874	1.61675e-11	1.12162e-07
Mbtd1	-0.905211	6.72701	42.3292	7.71337e-11	2.761e-07
Psmd4	0.517445	8.19165	42.2677	7.95965e-11	2.761e-07
Chchd2	1.51705	11.3859	35.0727	3.1763e-09	7.5444e-06
Glg1	-0.70114	5.34582	34.7204	3.80619e-09	7.5444e-06
Mapt	-0.470784	10.4387	34.7837	3.68451e-09	7.5444e-06
C130046K22Rik	-1.95024	1.86935	31.2525	2.26559e-08	3.92938e-05
Cyp2f2	-4.53728	0.0664104	29.1763	6.6083e-08	0.000101878
Ctsk	-1.39864	1.64036	28.799	8.02928e-08	0.000111406
Cacna2d2	-0.578828	5.36923	25.4311	4.58473e-07	0.000504417
Impad1	-0.52806	5.81393	25.2479	5.04156e-07	0.000504417
Kcnj9	-0.927882	3.45103	25.1808	5.22006e-07	0.000504417
Msl1	-0.381321	8.88268	25.0965	5.45316e-07	0.000504417
Stac2	-0.769337	4.19504	25.3757	4.71818e-07	0.000504417
Fabp7	0.695254	6.24259	24.2943	8.2685e-07	0.000717034
Sv2a	-0.419625	7.65412	23.9419	9.92858e-07	0.000810348
Slc47a1	-1.7425	2.16131	23.1461	1.50145e-06	0.00115737
Tmem132e	-1.45405	1.40247	21.9494	2.7993e-06	0.00204423
Trh	-3.42536	2.61165	20.9476	4.72017e-06	0.00327462
Thpo	0.673239	3.16935	20.134	7.22036e-06	0.00477059
Utp18	0.632602	4.62131	19.8441	8.40215e-06	0.00529908
C230091D08Rik	-0.573798	4.04134	19.3804	1.07098e-05	0.00646082
Fn1	-0.474125	6.49642	19.1714	1.19489e-05	0.00663165
Tppp3	-0.446896	5.70512	19.2475	1.14822e-05	0.00663165
Fxr1	-0.498098	5.03035	18.6921	1.53615e-05	0.00819775
Cdh1	-1.59286	2.73552	18.558	1.64808e-05	0.00846931
Pcdh7	-0.625487	4.90615	18.3965	1.79383e-05	0.00888908
Nemf	-0.359984	5.75559	17.7539	2.51397e-05	0.012028
Wnt6	-1.93229	0.880062	17.4502	2.94941e-05	0.013641
G530011O06Rik	-3.26454	0.00284101	17.2347	3.30345e-05	0.0142082
Rps27a	1.28269	8.03382	17.1916	3.37926e-05	0.0142082
Tcaf1	-0.601988	3.96259	17.2556	3.26735e-05	0.0142082
Fibin	-0.962415	1.94547	16.7143	4.34519e-05	0.0177322
Klf6	-0.423305	6.31537	16.5977	4.6208e-05	0.0183182
Ecel1	-1.56411	1.99969	16.5167	4.82241e-05	0.0185864
Mpp6	-0.44073	5.14337	16.2128	5.66096e-05	0.0212286
Etnppl	-1.06067	4.44074	16.0346	6.21954e-05	0.0227095
Luc7l	-0.374236	6.27389	15.9367	6.54968e-05	0.0233017
Rbm28	0.539185	6.48635	15.2868	9.23603e-05	0.0320375
Oxt	-1.93772	1.37115	15.0231	0.000106201	0.03594
Ube2r2	-0.424666	7.82819	14.3693	0.00015023	0.0496295
Abcf1	-0.35406	5.21226	14.0489	0.000178123	0.0574756
Spp1	-0.834998	4.7705	13.8991	0.000192889	0.0602225
Srp54b	2.20311	3.48402	13.8756	0.000195316	0.0602225
Dysf	1.72032	0.273413	13.769	0.000206719	0.0623529
Cygb	-0.314754	6.80255	13.4291	0.000247756	0.0716171
Penk	-0.602224	6.06559	13.433	0.000247236	0.0716171
Helz	-0.394524	5.18328	13.1512	0.00028733	0.0766675
Ide	-0.409085	5.19151	13.1731	0.000283992	0.0766675
Kcnj12	-0.756386	3.42899	13.1747	0.000283749	0.0766675
Smoc1	-0.5956	3.52097	13.2071	0.000278891	0.0766675
Fam163b	0.327565	6.52266	13.1107	0.000293608	0.0768643
Snf8	0.351437	4.9659	13.0407	0.000304792	0.0783146
Gm7120	-0.657219	3.83981	12.8944	0.00032957	0.0831416
Vamp1	-0.391136	6.69002	12.8497	0.000337527	0.0836284
Dek	-0.279266	7.14963	12.7308	0.000359678	0.0875533
Cntfr	-0.415342	4.85742	12.3946	0.000430575	0.095385
Itgb3	-1.52377	0.497397	12.4585	0.00041609	0.095385
Slc2a9	0.724066	2.96193	12.3837	0.0004331	0.095385
Smarca2	-0.315068	8.09768	12.4971	0.000407574	0.095385
Spint1	1.23521	0.981853	12.5289	0.000400715	0.095385
Ylpm1	-0.382991	7.33166	12.4105	0.000426933	0.095385
Ptpn22	-1.74837	0.435056	12.1995	0.00047802	0.103633
Tcf15	0.573782	2.75285	12.17	0.000485631	0.103663
Zbtb38	-0.803835	2.57588	12.1333	0.000495295	0.104124
Cckar	-2.26902	-0.057609	11.9867	0.000535802	0.110959
Irs4	-1.52611	1.14202	11.9152	0.00055677	0.113606
Abt1	0.40727	4.64973	11.8857	0.000565669	0.113749
Cdc42ep1	-0.636948	2.82879	11.6893	0.000628619	0.123078
Krt12	-2.05811	1.81311	11.6697	0.000635257	0.123078
Tmie	-1.3977	1.80385	11.6341	0.000647548	0.123078
Zfp30	-0.404038	4.6102	11.6581	0.000639229	0.123078
Upb1	-1.61751	0.468776	11.3986	0.000735005	0.137813
Zbtb40	-0.680192	2.5107	11.3152	0.000768764	0.142221
Sphk1	-1.25157	1.69907	11.2511	0.000795753	0.145277
Mrpl27	0.334798	5.43163	11.2252	0.000806926	0.145404
Pdk4	1.77012	0.832385	11.1773	0.000828037	0.147295
Kmt2a	-0.316129	6.76281	11.1486	0.000840972	0.147702
H2-Q1	-2.55888	0.048555	11.081	0.000872167	0.149996
Pbx3	-0.467453	5.04932	11.0736	0.000875651	0.149996
Cdk19	-0.33028	6.46447	11.0423	0.000890584	0.150693
Arhgap6	-0.933157	3.75121	11.0153	0.00090363	0.151059
Mthfd2	-0.62488	4.28935	10.9237	0.000949441	0.156827
Arl5c	0.970156	1.30722	10.7912	0.00101982	0.166295
Gm5113	-0.740716	2.1467	10.7715	0.00103073	0.166295
Baiap3	-1.23392	2.56336	10.743	0.00104672	0.166934
Wnk1	-0.303756	8.1987	10.6575	0.00109626	0.172848
Cdk12	0.606895	4.76618	10.5555	0.00115841	0.177379
Nfatc3	-0.374804	5.09214	10.5477	0.00116335	0.177379
Pygm	-0.540212	3.61307	10.5711	0.00114868	0.177379
Cbx3	-0.412095	3.78923	10.4611	0.00121915	0.179954
Dach1	-0.575389	3.44219	10.4679	0.00121467	0.179954
Ppig	-0.262991	8.16537	10.4854	0.00120319	0.179954
Cenpw	0.455631	3.88657	10.4145	0.00125027	0.181083
Slc13a3	-0.505258	4.05224	10.4107	0.0012529	0.181083
Arid4b	-0.347437	7.49328	10.3624	0.00128606	0.183308
Rab40b	0.544191	4.65973	10.35	0.00129471	0.183308
Rcan2	-0.394073	6.59523	10.2595	0.00135979	0.186232
Tmem181b-ps	0.707874	3.3167	10.2543	0.00136364	0.186232
Tox3	-0.522806	3.82343	10.2897	0.00133772	0.186232
Zcchc7	-0.346958	5.54657	10.247	0.00136906	0.186232
Irf3	-0.613167	2.88545	10.1928	0.00140988	0.186749
Jun	0.309182	7.19399	10.1908	0.00141141	0.186749
Mpp3	0.267806	6.60627	10.1755	0.00142319	0.186749
Scrt1	-0.379067	5.04161	10.171	0.00142669	0.186749
Coq2	0.314741	5.43882	10.1395	0.00145122	0.188183
Msmo1	0.274785	7.19334	10.1202	0.00146656	0.188412
Rtp1	-1.63718	0.217044	10.0832	0.00149625	0.188731
Shisa8	-0.900368	1.11893	10.0839	0.00149573	0.188731
Cd33	1.01181	0.993001	10.0575	0.00151728	0.189404
Rasa2	0.409638	5.92781	10.0435	0.00152888	0.189404
Unc13c	-0.698925	5.79774	10.0091	0.00155765	0.19126
Cep126	-0.79325	1.7052	9.9913	0.00157282	0.191428
Apod	-0.609727	6.78242	9.96614	0.00159446	0.192375
Fgf5	0.918464	1.20665	9.81027	0.0017354	0.207575
Lipm	1.80744	0.111101	9.79401	0.00175081	0.207628
Ackr3	0.521112	4.23161	9.7248	0.00181798	0.209829
Dnajb5	0.610727	7.19878	9.7361	0.00180684	0.209829
Exosc3	0.623222	2.62452	9.74945	0.00179376	0.209829
Gm10638	-0.728897	1.90764	9.69771	0.00184498	0.209829
Spef1	-0.405794	3.7587	9.6995	0.00184318	0.209829
Slc38a5	0.984074	1.8612	9.67552	0.00186739	0.210651
Apln	-0.397457	5.1318	9.64735	0.00189625	0.211105
Mettl16	-0.428722	4.06489	9.64194	0.00190185	0.211105
Gm1943	-1.18183	0.971358	9.62353	0.00192101	0.211539
Fmo1	-0.753057	2.00476	9.60233	0.0019433	0.21231
Fcgrt	-0.555596	3.0842	9.56312	0.00198526	0.215199
Fgfbp1	-1.68896	0.290008	9.4717	0.00208665	0.224437
Cntn4	-0.579598	3.23027	9.43827	0.00212504	0.226807
Cfap44	-1.348	0.409807	9.37992	0.00219376	0.231928
Fam198a	-0.553813	2.8036	9.34178	0.00223988	0.231928
Gipc2	-0.852894	1.66753	9.343	0.00223839	0.231928
Mgp	-0.744051	6.43177	9.35158	0.00222793	0.231928
Sh3rf3	-0.562475	3.3183	9.32793	0.00225688	0.231957
Hes1	0.406399	5.23061	9.31006	0.00227899	0.232507
C3ar1	0.561629	3.74698	9.26183	0.00233979	0.233558
Sntg2	1.08305	0.99751	9.26607	0.00233437	0.233558
Zbed6	-0.470322	3.94586	9.27142	0.00232757	0.233558
Akap8l	-0.30045	5.06874	9.21795	0.00239654	0.237514
Sox13	-0.820537	1.75711	9.20151	0.00241816	0.237957
Pxmp4	-0.680059	2.2224	9.17258	0.00245668	0.240046
Hmgcr	0.272426	7.13709	9.14712	0.0024911	0.241707
Il33	-0.415271	5.26606	9.08875	0.00257186	0.24781
Fam131a	0.337803	9.6644	8.98202	0.0027265	0.260897
Ndrg2	-0.288539	9.94702	8.94934	0.0027757	0.263787
C1d	0.265722	5.75156	8.9319	0.00280233	0.264308
Zfp472	0.526499	2.8384	8.92088	0.00281929	0.264308
Cd164l2	-1.51337	0.0235561	8.90214	0.00284837	0.264967
Dstn	-0.39486	4.65592	8.87969	0.0028836	0.264967
Zswim5	0.477843	3.3819	8.88965	0.00286791	0.264967
Smim14	0.329149	7.61713	8.83901	0.00294858	0.269155
Casq1	-1.26888	0.494217	8.79626	0.00301849	0.273736
Zbtb11	-0.244441	6.92562	8.75788	0.00308267	0.277741
Gm2061	0.587361	2.68308	8.73077	0.00312884	0.280081
Tstd1	-0.915861	1.81006	8.69292	0.00319448	0.284124
Wfikkn2	-1.31103	1.33733	8.65404	0.00326336	0.288402
Akap9	-0.262547	6.31073	8.62433	0.00331702	0.291289
Aig1	-0.876249	1.4844	8.61068	0.00334198	0.291635
Hmgb2	0.972528	2.38634	8.56194	0.00343264	0.293999
Klf9	-0.215755	9.05678	8.58125	0.00339641	0.293999
Sorcs2	-0.323249	4.85052	8.56422	0.00342835	0.293999
Ncbp1	0.269243	5.83289	8.53586	0.00348217	0.296412
Eif2a	0.338749	4.59457	8.42569	0.00369956	0.311099
Igfbp4	0.304549	8.18153	8.4274	0.00369608	0.311099
Atp6v1c2	-1.69015	0.00560732	8.40847	0.00373477	0.311716
Mau2	-0.511044	3.72913	8.40019	0.00375183	0.311716
Camk2d	-0.762203	5.9697	8.35228	0.00385203	0.318136
Arhgap5	-0.381455	4.85688	8.3396	0.00387902	0.31847
Bcl6b	1.09685	1.14432	8.30393	0.00395594	0.320986
Scaper	-0.246055	6.37765	8.31011	0.0039425	0.320986
Tmsb4x	0.368401	10.8104	8.27156	0.00402708	0.324859
Rdm1	-1.02858	1.45403	8.25352	0.0040673	0.325099
Top1	-0.235648	8.06097	8.24924	0.00407692	0.325099
Opalin	0.450856	4.51446	8.22042	0.00414215	0.328413
Idh1	0.274936	5.78806	8.20318	0.0041817	0.329665
Pin4	0.309733	4.66608	8.18346	0.00422741	0.331386
Cntn2	-0.311996	6.27713	8.15121	0.00430325	0.335102
Plce1	-0.505013	4.104	8.14285	0.00432312	0.335102
D630041G03Rik	-0.534614	3.53013	8.10961	0.00440312	0.338039
Per2	-0.377789	5.04879	8.10689	0.00440973	0.338039
Shb	0.457652	3.16813	8.0966	0.00443483	0.338095
Myoc	-0.638111	6.06858	8.06789	0.00450566	0.341618
Trim72	1.36627	0.15031	8.05171	0.00454608	0.342809
Atg13	-0.299728	4.98762	8.00147	0.00467395	0.346797
Fbln2	1.12111	0.484669	8.011	0.00464942	0.346797
Psrc1	0.512913	2.83648	8.00485	0.00466523	0.346797
Mitd1	-0.387063	3.56759	7.97234	0.00474976	0.350547
Ampd2	0.273272	5.57425	7.885	0.00498466	0.354144
Bccip	0.394117	4.55525	7.91488	0.00490299	0.354144
Cnnm1	-0.317108	4.93008	7.91721	0.00489668	0.354144
Dgki	-0.629798	2.42522	7.90652	0.00492571	0.354144
Klf5	-0.732631	3.26262	7.87499	0.00501232	0.354144
Lrrk2	-0.354924	3.76017	7.90372	0.00493333	0.354144
Numa1	-0.228914	6.40919	7.87086	0.00502378	0.354144
Pebp1	0.339776	7.59753	7.86927	0.0050282	0.354144
Rpl14-ps1	-0.26102	6.52546	7.91127	0.00491278	0.354144
4930507D05Rik	1.28857	0.167934	7.77212	0.00530586	0.355749
Cul2	0.258375	5.36605	7.78629	0.00526443	0.355749
D630033O11Rik	-1.28719	0.049413	7.82103	0.00516416	0.355749
Dct	1.14762	0.786682	7.81416	0.00518384	0.355749
Dhrs4	-0.346975	4.43232	7.77161	0.00530738	0.355749
Fam155a	-0.256912	7.75942	7.8042	0.00521249	0.355749
Flrt1	-0.424348	4.71618	7.77339	0.00530214	0.355749
Mir22hg	0.337741	5.98494	7.83402	0.0051272	0.355749
Sgol2a	0.823135	1.30283	7.78875	0.00525727	0.355749
Tufm	-0.494196	2.7143	7.83484	0.00512486	0.355749
Atp10d	1.24265	0.361609	7.73511	0.00541573	0.361265
Pcsk9	-2.00352	0.3549	7.70027	0.00552126	0.364798
Tshz1	-0.33737	5.58372	7.7044	0.00550863	0.364798
Eml5	0.286567	6.34167	7.67426	0.00560141	0.366602
Slc44a1	-0.311362	5.60581	7.67979	0.00558425	0.366602
Fam101b	0.442501	4.00742	7.64536	0.00569186	0.370773
Pld4	-0.972633	1.38445	7.62466	0.00575754	0.373298
Arid4a	-0.234745	7.03163	7.53484	0.0060517	0.379818
Dazl	0.644931	2.77503	7.5292	0.0060707	0.379818
Fmod	-1.08406	2.77937	7.5846	0.00588689	0.379818
Gstm1	-0.23243	6.57705	7.5273	0.00607708	0.379818
Lcp1	0.432163	3.33309	7.53819	0.00604047	0.379818
Mpeg1	0.444395	3.24163	7.52997	0.00606809	0.379818
Rhoh	-1.40219	0.0709295	7.57566	0.00591618	0.379818
Spock2	-0.368992	4.61975	7.565	0.00595126	0.379818
AI464131	-0.368808	3.80416	7.42555	0.00643043	0.379916
Adgra1	-0.395843	5.19258	7.415	0.00646823	0.379916
Cenpm	-0.685348	2.39667	7.4955	0.00618535	0.379916
Cwc27	0.39407	3.71365	7.50552	0.006151	0.379916
Gnpda1	-0.562149	2.89476	7.42027	0.00644931	0.379916
Hps6	-0.411835	3.50163	7.4252	0.00643167	0.379916
Khdrbs2	-1.32235	0.905475	7.44564	0.00635904	0.379916
Lmbrd2	-0.28648	5.62819	7.41993	0.00645053	0.379916
Meis2	-0.341539	7.21974	7.44769	0.00635179	0.379916
Msra	0.32811	4.98958	7.4171	0.00646069	0.379916
Nktr	-0.215285	7.18399	7.43249	0.00640568	0.379916
Slc38a2	-0.230884	8.01479	7.50267	0.00616075	0.379916
Thbd	-0.796719	3.48359	7.40913	0.00648938	0.379916
Trhr	-0.878345	2.6775	7.41101	0.00648259	0.379916
Tubgcp3	0.314004	4.47909	7.47197	0.00626668	0.379916
4732491K20Rik	0.915675	0.974642	7.38333	0.00658313	0.383786
Sypl2	0.664499	1.82571	7.36805	0.00663927	0.385439
Zfp442	-0.611155	2.04089	7.34645	0.00671955	0.388474
Jmjd8	-0.426551	3.79973	7.31324	0.00684486	0.389231
Nkapl	-0.851643	1.09808	7.31828	0.00682568	0.389231
Otof	-0.939554	2.29321	7.32163	0.00681295	0.389231
Ptgds	-0.973608	9.50341	7.32637	0.00679503	0.389231
Rbbp7	0.234133	7.33621	7.29731	0.00690578	0.391093
A230009B12Rik	-0.926802	1.07004	7.28781	0.00694241	0.391569
Epha10	-0.33161	6.38809	7.25131	0.00708491	0.397989
Ntf3	0.609842	2.71082	7.22817	0.00717683	0.401526
Arid5b	-0.412429	4.13155	7.20146	0.00728444	0.402507
Baz2b	-0.311937	5.68897	7.20867	0.00725521	0.402507
Nprl2	-0.297272	5.24836	7.19507	0.0073104	0.402507
Snhg10	0.525626	2.81317	7.19967	0.00729171	0.402507
Bdnf	0.340654	6.50235	7.17073	0.00741028	0.405102
G6pc3	-0.409581	3.555	7.16936	0.00741592	0.405102
Arpc1b	0.286442	5.45337	7.09522	0.00772898	0.40693
Clstn2	0.33606	6.17693	7.12516	0.00760097	0.40693
Cmc4	-0.45009	3.67871	7.09205	0.00774267	0.40693
Inha	-0.75214	2.67618	7.1271	0.00759273	0.40693
Klk6	-1.35697	0.217151	7.11132	0.00765985	0.40693
Myl9	-0.616395	2.50035	7.13595	0.00755536	0.40693
Rgl3	-0.96987	0.75471	7.09304	0.00773839	0.40693
S100b	-0.236831	8.39046	7.13542	0.00755758	0.40693
Slco5a1	0.636032	2.30585	7.14361	0.00752317	0.40693
Zcchc24	-0.305837	6.42703	7.1024	0.0076981	0.40693
Fat3	-0.249408	5.78969	7.06855	0.00784488	0.409571
Lrrc4	0.224662	6.50409	7.06693	0.00785196	0.409571
Col1a2	-0.86274	4.02199	7.03763	0.00798146	0.414767
Slc22a6	-0.931333	2.40084	7.01436	0.00808585	0.418624
Adam33	-1.74077	0.477464	6.99041	0.00819474	0.422684
Adam15	-0.24732	7.50529	6.95561	0.00835567	0.423065
Ddit3	-0.304972	4.67302	6.92992	0.00847654	0.423065
Dnm3	-0.281162	6.99103	6.96104	0.00833036	0.423065
Fam107b	0.445566	3.627	6.97252	0.00827707	0.423065
Gmnc	1.03132	1.16096	6.94031	0.00842744	0.423065
Mamdc2	1.44364	0.320176	6.95314	0.00836724	0.423065
Rnf166	-0.335697	4.39897	6.9401	0.00842842	0.423065
Susd4	-0.456186	4.78269	6.93458	0.00845448	0.423065
Thra	-0.195697	6.84015	6.96469	0.00831339	0.423065
D2hgdh	0.571428	1.84102	6.90812	0.00858052	0.423682
Mobp	-0.395832	7.12736	6.90858	0.00857829	0.423682
Ndn	0.401919	6.56401	6.91447	0.00855012	0.423682
Asb11	1.2829	0.221796	6.88133	0.00871009	0.427041
Xkr8	-0.525644	2.43999	6.88399	0.0086971	0.427041
Atp6v0a2	-0.262559	4.90435	6.82916	0.00896815	0.432522
Gatad2b	-0.556727	3.07156	6.83291	0.00894935	0.432522
Lrp12	0.311102	6.40809	6.83104	0.0089587	0.432522
Myl6	-0.26938	7.67602	6.82725	0.00897775	0.432522
Pln	-0.926203	1.59548	6.82739	0.00897701	0.432522
Foxc2	-1.51718	0.465511	6.77072	0.00926654	0.443356
Shc2	0.266998	5.42778	6.77434	0.00924778	0.443356
Igf2bp2	-1.15737	0.452232	6.7426	0.00941375	0.448851
C530008M17Rik	0.244495	5.97807	6.71706	0.00954951	0.449543
Car5a	1.33968	-0.0563795	6.69774	0.00965354	0.449543
Cml3	-0.820795	1.23285	6.69149	0.00968745	0.449543
Dlk1	-0.62804	3.82495	6.70819	0.0095971	0.449543
Etv4	-0.509143	2.40703	6.70818	0.00959717	0.449543
Rab27b	-0.234428	5.22182	6.72715	0.00949564	0.449543
Sf3b4	0.351726	4.17528	6.6928	0.00968032	0.449543
Uqcrfs1	0.26907	8.21089	6.70393	0.00962006	0.449543
Kif5b	-0.200509	9.32606	6.65872	0.00986716	0.456356
Rps17	0.294527	5.73345	6.64967	0.00991743	0.457157
Acsf2	1.40667	0.128509	6.63494	0.00999977	0.457285
Actl6b	0.277948	5.73178	6.6315	0.0100191	0.457285
Trim56	-0.530853	2.83617	6.64183	0.00996115	0.457285
Slx4	0.70931	2.30991	6.6081	0.0101516	0.461814
Ccar2	0.711077	1.4656	6.60009	0.0101974	0.462381
Plec	-0.33739	4.29094	6.58927	0.0102595	0.463684
Fam69a	0.328662	4.20854	6.57088	0.0103661	0.466977
Trabd2b	-0.713202	2.08509	6.56387	0.010407	0.467303
Supt6	-0.289214	6.00346	6.55318	0.0104697	0.468602
Cenpf	0.679052	2.12068	6.53795	0.0105597	0.469923
Tacc3	0.505353	2.57985	6.53673	0.0105669	0.469923
Gtf2b	0.353411	4.8245	6.52875	0.0106145	0.470114
Nrtn	-1.48402	0.146755	6.52058	0.0106633	0.470114
Zfp459	-0.734538	1.59808	6.51899	0.0106729	0.470114
Ppip5k1	-0.293235	6.5216	6.50511	0.0107565	0.472298
4930451G09Rik	1.1834	0.594764	6.44841	0.0111052	0.473142
Arhgef6	0.349361	4.17782	6.47515	0.0109393	0.473142
Atp2c1	0.196171	7.12803	6.46639	0.0109934	0.473142
Csgalnact2	0.319544	4.0853	6.46724	0.0109881	0.473142
Lrp4	-0.266119	4.79325	6.47524	0.0109388	0.473142
Ndrg4	0.223162	10.5214	6.48268	0.0108931	0.473142
Orai2	0.344819	5.2767	6.44743	0.0111113	0.473142
Osbpl1a	-0.404426	6.88525	6.44675	0.0111155	0.473142
Pias4	-0.557717	2.59661	6.48722	0.0108653	0.473142
Syap1	0.479844	4.61382	6.44657	0.0111167	0.473142
Dner	-0.255883	8.2111	6.41688	0.0113041	0.476898
Gm17750	0.562506	2.41719	6.41625	0.0113081	0.476898
Hspb1	-0.632454	2.23558	6.42525	0.0112509	0.476898
Actr3	0.241843	7.7515	6.40738	0.0113647	0.477834
Ybx1	0.262886	7.04184	6.3661	0.0116321	0.487599
Il1r1	0.73142	2.42075	6.34191	0.0117918	0.489218
Lmf2	-0.582815	2.30509	6.3481	0.0117507	0.489218
Map7d2	-0.187605	7.78401	6.35354	0.0117147	0.489218
Prkcsh	-0.256038	5.35922	6.33891	0.0118118	0.489218
Hspb8	-0.295284	6.07839	6.32871	0.0118799	0.490575
Cdh7	-0.982825	1.40035	6.31897	0.0119453	0.491813
Sobp	-0.204256	7.9038	6.31186	0.0119933	0.492329
Tut1	-0.52162	2.19239	6.30547	0.0120366	0.492649
Alcam	-0.206999	6.69876	6.28983	0.0121433	0.495315
Ccz1	0.234926	5.34809	6.26804	0.0122935	0.495315
Dand5	-0.443531	2.69836	6.26481	0.0123159	0.495315
Ift27	-0.460583	2.91574	6.27603	0.0122382	0.495315
Rab33b	0.270145	4.42873	6.26746	0.0122976	0.495315
Tead3	0.778258	1.23246	6.28457	0.0121793	0.495315
Abcb1a	-0.281859	5.79976	6.24864	0.0124289	0.496975
Snhg4	0.294232	5.43668	6.24989	0.0124201	0.496975
Emp2	0.275948	5.9612	6.22409	0.0126023	0.499442
Mrps24	0.318177	4.08547	6.21809	0.0126452	0.499442
Rfesd	0.390132	3.02956	6.21454	0.0126705	0.499442
Timp3	-0.296186	9.27009	6.22713	0.0125808	0.499442
Ubl4a	-0.313025	4.44523	6.2276	0.0125774	0.499442
Ankrd11	-0.205651	7.2834	6.20558	0.0127348	0.500083
Plat	0.334126	5.81979	6.20224	0.0127589	0.500083
0610030E20Rik	-0.297152	4.37865	6.1881	0.0128612	0.500829
Epas1	-0.193763	7.21136	6.18467	0.0128862	0.500829
Ptgdr	-1.23473	0.850178	6.18797	0.0128622	0.500829
Erh	0.46708	4.44144	6.16544	0.013027	0.50125
Gm1821	-0.204499	6.50944	6.15858	0.0130777	0.50125
Mmel1	-2.18431	-0.0816263	6.17018	0.0129922	0.50125
Slc35b3	0.423329	3.89345	6.15927	0.0130725	0.50125
Usp38	0.307888	4.89837	6.16814	0.0130071	0.50125
Rcc1	0.271334	5.19703	6.13104	0.0132829	0.507713
Aldh9a1	-0.314611	3.79524	6.08437	0.0136383	0.510056
Cd99l2	-0.299282	5.68403	6.09227	0.0135774	0.510056
Cttn	0.27892	6.41609	6.10637	0.0134696	0.510056
Lipg	1.18055	0.358859	6.09331	0.0135695	0.510056
Mcm6	0.509429	3.79874	6.10138	0.0135077	0.510056
Mllt10	-0.277652	6.40919	6.09667	0.0135437	0.510056
Mpzl2	-1.04609	2.94075	6.08789	0.0136112	0.510056
Nabp1	0.409757	4.97812	6.09807	0.013533	0.510056
Tnnt1	-1.46143	2.46875	6.07055	0.0137454	0.512682
Ankrd26	-0.461341	3.00759	6.05046	0.0139027	0.516476
Hsd17b7	0.268714	5.575	6.0107	0.0142194	0.516476
Iyd	0.865815	2.18531	6.01284	0.0142021	0.516476
Krt73	0.551901	2.89889	6.01202	0.0142088	0.516476
Map2k5	-0.313021	4.06092	6.04203	0.0139692	0.516476
Parn	0.233282	5.08496	6.02534	0.0141019	0.516476
Plek	0.397182	3.69551	6.03765	0.0140039	0.516476
Siah2	0.358882	3.5656	6.02913	0.0140717	0.516476
Tmem63a	-0.254421	6.36823	6.04088	0.0139783	0.516476
Ube2v2	0.201377	6.33852	6.02225	0.0141266	0.516476
Bmp4	-0.550764	3.06699	5.99653	0.0143341	0.51708
Camk2n1	-0.353415	10.6787	5.97739	0.0144904	0.51708
Ccdc82	-0.27453	4.70083	5.96782	0.0145693	0.51708
Fxn	-0.491513	2.23181	5.98852	0.0143993	0.51708
Gjb6	-0.297317	6.51503	5.98043	0.0144655	0.51708
Isl1	-1.78716	0.335579	5.96775	0.0145699	0.51708
Kcnj16	-0.29339	4.60669	5.95439	0.0146807	0.51708
Nwd1	0.59674	2.03662	5.95746	0.0146551	0.51708
Pdzrn4	-0.379543	4.74717	5.9648	0.0145943	0.51708
Sgtb	-0.373323	3.17165	5.95409	0.0146832	0.51708
Vsig10l	-0.950488	0.466183	5.97794	0.0144859	0.51708
Yy2	0.472089	2.5299	5.96512	0.0145916	0.51708
Fkbp7	-0.546538	3.03259	5.93808	0.0148172	0.519492
Gmps	-0.50049	2.73517	5.93696	0.0148266	0.519492
Epb4.1l4a	0.59263	2.0926	5.91491	0.0150133	0.524633
Lhx9	0.634108	3.438	5.90817	0.0150709	0.524633
Tac1	-0.386652	4.70018	5.90631	0.0150867	0.524633
Grip1	0.241028	6.18924	5.89543	0.0151802	0.526148
Kdm8	0.992601	0.890794	5.89243	0.0152061	0.526148
Foxn2	0.469157	3.73843	5.88236	0.0152933	0.526222
Gpr68	0.332742	3.90476	5.88121	0.0153033	0.526222
Tpm2	-0.711624	1.30129	5.87905	0.0153221	0.526222
Tll1	1.06007	0.346795	5.86049	0.0154845	0.530488
Chordc1	-0.240148	6.54218	5.84516	0.01562	0.53381
Cebpb	0.256919	5.61574	5.83904	0.0156744	0.534354
Ppp2r5d	-0.228881	6.65912	5.83077	0.0157483	0.535556
Ippk	0.412556	5.31032	5.81677	0.015874	0.535815
Rnf169	-0.269027	5.4428	5.81722	0.0158701	0.535815
Rpgrip1	-1.16293	0.584728	5.81276	0.0159103	0.535815
Vezt	-0.221837	6.27818	5.82007	0.0158443	0.535815
Fgd5	0.574199	1.7711	5.8013	0.0160143	0.536597
Lig1	-0.314969	4.91883	5.79744	0.0160496	0.536597
Tdp2	0.512295	3.24409	5.79789	0.0160454	0.536597
Csrp1	-0.219096	6.84716	5.78804	0.0161356	0.536707
Kcnt1	-0.407612	4.19234	5.78441	0.0161689	0.536707
Zfp93	0.473436	2.67938	5.78657	0.0161491	0.536707
Cntn3	-0.336986	4.23136	5.77666	0.0162403	0.536723
Itih5	-0.373221	4.95017	5.77179	0.0162854	0.536723
Rab4b	-0.275021	4.63314	5.77301	0.0162742	0.536723
Plcb4	-0.730257	1.96151	5.76008	0.0163944	0.539033
Stxbp6	0.210613	6.97213	5.75434	0.016448	0.539517
Cabp1	-0.341346	4.74928	5.73752	0.0166062	0.541574
Fhdc1	-0.676948	1.96567	5.73412	0.0166384	0.541574
Zc2hc1c	-0.585449	1.79526	5.73956	0.0165869	0.541574
Zfp326	-0.245495	5.92019	5.73112	0.0166668	0.541574
Itpr2	-0.265161	5.23581	5.72186	0.016755	0.542086
Yeats2	-0.28304	5.02221	5.72126	0.0167607	0.542086
Ifitm1	-0.78637	1.74873	5.70216	0.016944	0.544668
Pacrgl	0.448595	2.71036	5.70179	0.0169476	0.544668
Zcchc11	0.268797	5.30359	5.70068	0.0169583	0.544668
Lrrc8d	0.195477	6.16579	5.68398	0.0171205	0.547344
Spred1	-0.237219	7.01458	5.68436	0.0171168	0.547344
9930014A18Rik	1.09369	0.714949	5.6779	0.0171799	0.547979
2010300C02Rik	0.260196	7.01716	5.67122	0.0172454	0.548471
Aagab	0.199791	6.97159	5.66828	0.0172744	0.548471
1110004F10Rik	0.282434	6.8511	5.64267	0.0175285	0.548982
2610507B11Rik	0.191568	7.88268	5.62575	0.0176984	0.548982
Asic4	-0.621989	2.68288	5.62572	0.0176988	0.548982
Ccng1	-0.219999	5.69719	5.6181	0.0177759	0.548982
Dbndd2	-0.193783	7.66173	5.63606	0.0175947	0.548982
Galns	0.46857	2.66766	5.61525	0.0178048	0.548982
Il6st	-0.387962	4.14645	5.63473	0.0176081	0.548982
Nsf	0.212378	9.98575	5.63081	0.0176475	0.548982
Prkg2	-0.711965	3.39321	5.62311	0.0177251	0.548982
Sfxn5	-0.210427	7.30365	5.66053	0.0173509	0.548982
Smpdl3b	-0.726657	0.886641	5.62821	0.0176737	0.548982
Tipin	0.23088	5.66941	5.61987	0.017758	0.548982
Ybx2	1.00724	0.309057	5.62306	0.0177257	0.548982
Il17d	-0.360539	4.45982	5.60976	0.0178607	0.549485
Tra2a	-0.228334	8.30613	5.59731	0.0179881	0.55218
C330018D20Rik	0.298263	4.04874	5.58404	0.0181249	0.55515
Lig4	0.30722	5.13571	5.57722	0.0181956	0.555414
Nek1	-0.300179	5.02301	5.57549	0.0182136	0.555414
Adora2a	-0.569484	2.1529	5.54828	0.0184988	0.557753
Cpeb3	-0.223329	6.19779	5.56334	0.0183404	0.557753
Dusp15	-0.605842	1.98493	5.5452	0.0185315	0.557753
Kazn	-0.387218	4.83641	5.55862	0.0183899	0.557753
Pkd2l1	-1.00617	1.31202	5.54964	0.0184845	0.557753
Shox2	-2.1076	2.99261	5.54522	0.0185312	0.557753
Lfng	-0.274241	4.97004	5.5373	0.0186153	0.557857
Npas3	0.24788	6.4955	5.53943	0.0185926	0.557857
E130308A19Rik	-0.441688	3.64823	5.51185	0.018888	0.561736
Fblim1	1.15605	0.362749	5.51489	0.0188552	0.561736
Foxk1	0.217176	7.5389	5.51012	0.0189067	0.561736
Ppp6r1	-0.204525	5.75851	5.51129	0.0188941	0.561736
Mms22l	0.533823	2.21598	5.50607	0.0189506	0.561836
BC039966	-1.7132	0.216894	5.49066	0.0191184	0.564399
Gpr1	-0.753779	0.872098	5.49201	0.0191035	0.564399
Brd3	-0.169428	6.78343	5.45488	0.0195137	0.574847
Gpr26	-0.703661	1.37653	5.44827	0.0195877	0.575804
Adgrg1	0.209911	6.47139	5.43685	0.0197161	0.577134
Kank4	-0.769088	1.67378	5.43926	0.0196891	0.577134
2310009B15Rik	0.328604	4.04245	5.40071	0.0201286	0.585519
Col12a1	-0.793741	1.251	5.3997	0.0201402	0.585519
Ddah1	-0.200347	6.16643	5.39688	0.0201728	0.585519
Ndufa1	0.308898	7.94364	5.39335	0.0202136	0.585519
Sqle	0.227547	6.269	5.39909	0.0201473	0.585519
Frmd3	-0.539267	3.34291	5.38461	0.0203151	0.587234
Hiat1	0.256832	6.0166	5.36768	0.0205133	0.588133
Mcf2	-0.458771	2.37912	5.37342	0.0204459	0.588133
Mt1	-0.293438	9.65192	5.37479	0.0204298	0.588133
Syt9	-0.606085	2.791	5.36746	0.0205158	0.588133
Rras2	0.268647	4.77625	5.35626	0.020648	0.590702
Aph1a	-0.183846	6.11695	5.32363	0.0210381	0.591668
Atp2c2	1.10299	0.129715	5.33024	0.0209585	0.591668
Bend6	-0.259401	7.55781	5.33867	0.0208573	0.591668
Bgn	-0.36405	4.04595	5.29448	0.0213931	0.591668
Ccdc151	-0.979374	0.97703	5.31863	0.0210985	0.591668
Cenpb	-0.24824	4.76544	5.30923	0.0212127	0.591668
Chodl	-1.20345	0.734934	5.32184	0.0210598	0.591668
Dyrk3	0.395197	3.57381	5.28544	0.0215045	0.591668
Greb1	-0.671265	2.11195	5.31715	0.0211165	0.591668
Kctd14	0.32205	3.84567	5.31248	0.0211732	0.591668
Lef1	-0.801627	1.73085	5.3066	0.0212447	0.591668
Ncoa4	0.878372	1.52061	5.29193	0.0214244	0.591668
Pcsk1n	-0.219588	6.9085	5.30081	0.0213155	0.591668
Plxnd1	-0.813835	3.08916	5.29955	0.021331	0.591668
Prrc2c	-0.196827	7.18757	5.34045	0.0208361	0.591668
Rmdn3	-0.202902	7.12117	5.30163	0.0213055	0.591668
Slc16a1	0.275436	5.16698	5.283	0.0215346	0.591668
Slc27a1	0.518988	2.80861	5.28761	0.0214777	0.591668
Slc4a3	-0.322677	4.68761	5.31827	0.021103	0.591668
Ywhab	0.216079	9.63618	5.34628	0.0207666	0.591668
Hlf	-0.320036	8.37772	5.24653	0.0219906	0.595938
Ly6g6e	0.687168	1.25773	5.24825	0.0219688	0.595938
Map1a	-0.187472	8.08211	5.2493	0.0219556	0.595938
Pan2	0.463291	2.95927	5.26362	0.0217756	0.595938
Peg3	-0.298339	4.65451	5.25042	0.0219415	0.595938
Slc25a34	-0.785432	0.962536	5.24937	0.0219547	0.595938
Vegfb	-0.295136	5.43391	5.25508	0.0218828	0.595938
Ndufb6	0.260453	6.6363	5.23367	0.0221537	0.597988
Prkar2b	-0.250954	5.22439	5.23039	0.0221956	0.597988
Rpl5	0.185368	7.06778	5.23251	0.0221685	0.597988
Fstl4	-0.538292	2.354	5.22094	0.0223164	0.599089
Stac3	-1.00606	0.553497	5.22045	0.0223228	0.599089
Cemip	0.449889	3.44194	5.21641	0.0223747	0.599323
Rcsd1	-0.53387	2.93989	5.21142	0.0224391	0.599494
Runx1t1	-0.203067	7.75384	5.20921	0.0224675	0.599494
Dnah7b	-1.05107	0.356459	5.19064	0.0227089	0.600177
Enc1	0.195543	10.2539	5.17916	0.0228594	0.600177
Lsm12	-0.534554	1.94835	5.19959	0.0225922	0.600177
Neurod2	0.315118	8.75998	5.19464	0.0226566	0.600177
Nfkb2	-1.06731	0.340021	5.17741	0.0228824	0.600177
Pccb	0.244135	5.63272	5.20383	0.0225372	0.600177
Rasl10a	0.246117	5.0353	5.18963	0.022722	0.600177
Rps12	-0.447831	5.89446	5.17926	0.022858	0.600177
Sat2	0.377391	3.14753	5.18665	0.0227611	0.600177
Miip	-0.479316	2.49822	5.17166	0.0229582	0.601029
Ccdc122	0.601746	2.04784	5.16301	0.0230729	0.602893
Ldlr	0.307531	5.60675	5.15435	0.0231882	0.603633
Snord89	-0.530344	3.08376	5.1544	0.0231875	0.603633
Dpy19l4	-1.26084	-0.0109104	5.13694	0.0234219	0.606304
Hpcal1	-0.538172	6.28091	5.13908	0.023393	0.606304
Rpl29	0.321615	3.39439	5.1402	0.0233779	0.606304
Cacna2d1	-0.169632	7.29573	5.11744	0.0236865	0.608031
Crebbp	-0.185795	6.76419	5.1255	0.0235768	0.608031
Gfap	-0.242505	6.67744	5.12852	0.0235358	0.608031
Olfml2b	0.481836	5.35645	5.11304	0.0237467	0.608031
Prickle3	-0.955058	0.512023	5.11268	0.0237515	0.608031
Sfswap	-0.179774	6.97909	5.11584	0.0237084	0.608031
Chrna1	0.814547	1.04393	5.10782	0.0238183	0.608616
Nipsnap3b	0.209835	5.82015	5.10459	0.0238627	0.60863
6330403K07Rik	-0.205798	7.29183	5.09072	0.0240542	0.611267
Mpc2	0.188197	7.39918	5.09231	0.0240322	0.611267
Ccdc58	0.596419	3.03025	5.05966	0.024489	0.612028
Crmp1	0.275171	6.88606	5.05025	0.0246223	0.612028
Fam76a	-0.207067	5.78143	5.07578	0.0242623	0.612028
Fam81a	-0.324839	5.55188	5.0732	0.0242984	0.612028
Gal3st1	0.566593	1.68675	5.06715	0.0243834	0.612028
Hinfp	0.693133	1.35868	5.07996	0.024204	0.612028
Ido2	0.646867	1.16736	5.04778	0.0246576	0.612028
Inpp5a	-0.225875	5.57951	5.06404	0.0244272	0.612028
Nol12	-0.374434	3.08601	5.05645	0.0245345	0.612028
Sfmbt2	-0.557154	2.16883	5.04883	0.0246426	0.612028
Sh3gl1	0.342973	3.96424	5.07609	0.0242581	0.612028
Stc1	-0.402496	3.4613	5.07084	0.0243317	0.612028
Ubr2	-0.16631	7.13068	5.06219	0.0244533	0.612028
Dnaic1	0.745676	1.02804	5.02403	0.024998	0.617264
Fam210a	-0.214283	4.80379	5.02506	0.024983	0.617264
Ppm1l	-0.201121	5.98439	5.02375	0.025002	0.617264
9430020K01Rik	-0.253925	6.35302	5.00673	0.025249	0.621495
Camk1d	0.257591	7.8994	5.00577	0.0252629	0.621495
Nedd9	0.341973	3.89378	4.99594	0.0254068	0.623929
Daam2	-0.24153	5.18818	4.97181	0.0257637	0.624259
Hspb2	-1.06512	0.218794	4.98464	0.0255733	0.624259
Kif13a	-0.191338	6.27168	4.97075	0.0257795	0.624259
Nup155	-0.224122	4.5506	4.9829	0.025599	0.624259
Pik3r1	-0.226025	5.86095	4.97842	0.0256655	0.624259
Sh3bp5	0.304157	8.85887	4.98629	0.0255489	0.624259
Slc10a4	-1.10556	-0.0124624	4.9773	0.025682	0.624259
Snhg3	0.267906	5.87444	4.9707	0.0257802	0.624259
Ifit3b	-0.551812	2.9547	4.95936	0.0259498	0.624315
Nptx2	0.438547	4.27187	4.96422	0.025877	0.624315
Olfml3	0.518461	1.95496	4.95664	0.0259907	0.624315
Polr2k	0.604406	4.82	4.95983	0.0259427	0.624315
Rora	-0.397119	7.07989	4.95552	0.0260075	0.624315
Tor1a	0.240132	4.61853	4.94392	0.0261826	0.627433
Adamts15	-0.638773	2.58049	4.93986	0.0262442	0.627825
Aph1b	-0.322225	4.36879	4.90801	0.0267325	0.629744
Fgf18	0.585162	1.44711	4.91708	0.0265924	0.629744
Frg1	-0.310637	4.11787	4.9106	0.0266923	0.629744
Lpl	0.291646	7.31733	4.92194	0.0265177	0.629744
Lsm5	0.810081	1.55077	4.92539	0.0264648	0.629744
Meg3	-0.178938	13.0285	4.90983	0.0267043	0.629744
Papss2	-0.393349	3.65259	4.90798	0.0267329	0.629744
Shkbp1	-0.325068	3.78339	4.92523	0.0264673	0.629744
Slx1b	-0.21564	4.9247	4.90864	0.0267227	0.629744
Ptprd	-0.226471	8.23245	4.89827	0.0268836	0.63115
Topors	-0.212874	5.6948	4.89975	0.0268605	0.63115
Ddx5	0.219246	9.76147	4.88789	0.0270457	0.632679
Kif15	-0.840797	0.74594	4.88535	0.0270855	0.632679
Nfam1	-0.732104	0.744514	4.88997	0.0270131	0.632679
A330070K13Rik	-0.997719	0.392683	4.87788	0.0272031	0.634358
Celf2	0.209556	10.4889	4.87418	0.0272614	0.63465
Baz1b	-0.198709	7.23338	4.85601	0.02755	0.635539
Cped1	-0.977808	0.28754	4.86862	0.0273494	0.635539
Rpl10a	0.415488	3.58439	4.85448	0.0275744	0.635539
Sdcbp	0.186346	9.02923	4.8545	0.0275741	0.635539
Sh3tc2	-0.724255	0.75864	4.85641	0.0275436	0.635539
Zdbf2	-0.298303	6.30907	4.85787	0.0275203	0.635539
4931406C07Rik	0.292871	4.40738	4.82473	0.0280542	0.637314
Copg2	-0.236754	5.3531	4.82126	0.0281107	0.637314
Map3k13	-0.570366	1.84332	4.83156	0.0279433	0.637314
Nefh	-0.247109	5.07111	4.83489	0.0278894	0.637314
Nxn	-0.292432	4.53689	4.82225	0.0280946	0.637314
Rbks	-0.983673	0.221303	4.83137	0.0279464	0.637314
Slc16a7	0.787766	0.643966	4.82518	0.0280469	0.637314
Soga3	-0.1862	7.18232	4.83327	0.0279156	0.637314
Sprn	0.191251	6.85587	4.83624	0.0278676	0.637314
Zfp689	-0.574307	1.87864	4.83189	0.0279381	0.637314
Slc32a1	-0.176595	7.88423	4.80952	0.0283029	0.640624
Zgpat	-0.499143	1.90535	4.80643	0.0283537	0.640729
Prpf4b	-0.206286	5.84918	4.80303	0.0284097	0.64095
Fam69c	0.331284	3.19708	4.79318	0.0285726	0.641497
Lhfpl2	0.272286	5.14179	4.79588	0.0285278	0.641497
Moxd1	-0.320012	4.06421	4.79751	0.0285008	0.641497
A330041J22Rik	0.600306	1.48814	4.77125	0.0289388	0.643738
Cep19	0.214933	5.85036	4.78312	0.0287399	0.643738
Cox7c	0.334927	8.6907	4.76549	0.0290358	0.643738
Gabra3	-0.391751	7.42171	4.7612	0.0291083	0.643738
Insc	-0.740425	0.758293	4.74543	0.0293762	0.643738
Kctd7	0.331088	3.03409	4.76924	0.0289725	0.643738
Klhdc8a	-0.644605	3.04082	4.74899	0.0293154	0.643738
Lppr3	-0.300213	5.29647	4.76093	0.0291128	0.643738
Lrg1	1.17863	0.7806	4.77692	0.0288436	0.643738
Man2b2	0.916702	0.557832	4.7479	0.0293341	0.643738
Pgk1	0.355438	3.71037	4.74857	0.0293226	0.643738
Pold3	-0.344546	4.09789	4.76302	0.0290775	0.643738
Sacs	-1.12215	0.12899	4.75374	0.0292346	0.643738
Slc26a10	0.720664	0.957193	4.77048	0.0289518	0.643738
Spata24	0.464314	2.40056	4.74317	0.0294148	0.643738
Stat3	0.168163	6.76046	4.75356	0.0292378	0.643738
C1ql2	0.38572	5.93454	4.73411	0.0295702	0.644091
Cwf19l2	0.163961	6.44074	4.73811	0.0295015	0.644091
Dag1	-0.261689	5.3711	4.73445	0.0295642	0.644091
Snapc1	-0.221788	5.48337	4.72875	0.0296624	0.645087
Lcorl	-0.215528	5.91933	4.71768	0.029854	0.647225
Oscar	-1.0855	0.471754	4.71837	0.029842	0.647225
Tagap	-0.683869	1.2258	4.71495	0.0299015	0.647244
Srpk2	-0.169854	8.33845	4.71174	0.0299574	0.647444
Ccnt2	-0.27724	4.86506	4.70713	0.0300378	0.648172
Acbd3	-0.177692	6.63701	4.69704	0.0302147	0.648825
Cacna2d3	0.216403	5.78069	4.69474	0.0302551	0.648825
Caskin1	-0.201068	5.94589	4.69601	0.0302327	0.648825
Zeb1	-0.235778	5.12512	4.69617	0.03023	0.648825
Rasd2	-0.248413	4.5529	4.68968	0.0303442	0.649391
Triqk	0.474245	2.77914	4.68794	0.0303751	0.649391
Ubn1	-0.194084	8.33325	4.68484	0.03043	0.649533
Zer1	-0.193702	6.13379	4.68227	0.0304754	0.649533
Zkscan6	0.316374	3.85781	4.67783	0.0305544	0.650218
Dtx2	0.554052	1.81555	4.67518	0.0306014	0.650222
Mtr	-0.369125	3.23405	4.67034	0.0306878	0.650864
Rpusd4	0.390415	2.92219	4.66824	0.0307255	0.650864
Dhx33	0.283964	6.27235	4.66233	0.0308314	0.65112
Gbp5	-0.598027	1.96235	4.66354	0.0308097	0.65112
Acy1	-0.424843	3.3339	4.64492	0.0311456	0.652173
Camk2b	0.21232	8.98593	4.62926	0.0314311	0.652173
Cmtm3	0.48635	2.40169	4.63097	0.0313998	0.652173
Etohi1	0.632798	1.31039	4.65373	0.0309861	0.652173
Mcm4	0.387844	4.11004	4.63118	0.031396	0.652173
Mrpl54	0.35151	3.81021	4.63029	0.0314122	0.652173
Mtus1	-0.234583	6.08995	4.64604	0.0311252	0.652173
Pabpc4l	0.989723	0.167003	4.6514	0.0310282	0.652173
Pcdh19	0.216182	8.35461	4.63622	0.0313039	0.652173
Phf13	0.23032	5.4876	4.62849	0.0314453	0.652173
Slc36a2	-1.37744	0.200279	4.63338	0.0313558	0.652173
Spsb4	-0.657666	0.95056	4.63052	0.0314081	0.652173
6430503K07Rik	-1.08283	0.144534	4.62317	0.0315429	0.652968
Dmpk	-0.375172	3.39451	4.62127	0.0315778	0.652968
Klhl1	-0.403233	3.49321	4.61146	0.0317589	0.654762
Mllt4	-0.186177	6.73196	4.61279	0.0317344	0.654762
Mgst1	-0.47504	3.51995	4.60873	0.0318095	0.654833
Btaf1	-0.2737	4.27642	4.59769	0.032015	0.655174
Klhl5	0.189263	6.14271	4.59997	0.0319725	0.655174
Lime1	-0.274514	4.07086	4.60048	0.031963	0.655174
Trim66	-0.447172	3.41569	4.60429	0.031892	0.655174
Slc39a4	1.24791	0.664419	4.59331	0.032097	0.655884
Frem1	0.766962	1.36654	4.58297	0.0322911	0.658265
Tpcn1	-0.210722	6.08781	4.58206	0.0323084	0.658265
Acbd7	0.789537	0.58499	4.56614	0.0326099	0.65898
Ccdc71l	0.224233	5.91011	4.56576	0.0326172	0.65898
Dnase2a	-0.705134	1.22084	4.56019	0.0327234	0.65898
Elmod3	-0.383637	2.59075	4.56021	0.0327231	0.65898
Grm4	-0.469311	4.35876	4.56543	0.0326234	0.65898
Mospd3	-0.504069	3.09409	4.56055	0.0327166	0.65898
Ptn	-0.236842	4.4868	4.56185	0.0326918	0.65898
Tbx1	-0.86708	0.466355	4.57565	0.0324294	0.65898
Tfpt	0.263301	4.15353	4.55711	0.0327824	0.659212
Rpl4	0.178627	8.19961	4.55422	0.0328378	0.659369
4833439L19Rik	0.297398	6.23296	4.52927	0.0333198	0.660446
Cpne5	-0.455453	5.35452	4.54489	0.0330172	0.660446
Mzt2	0.300572	3.30397	4.53128	0.0332807	0.660446
Ncs1	0.190354	8.08505	4.53191	0.0332685	0.660446
Ociad2	0.243488	7.18572	4.54641	0.0329878	0.660446
Rcor2	0.277822	5.24818	4.53504	0.0332076	0.660446
Snw1	-0.177589	6.69884	4.5355	0.0331987	0.660446
Trap1	-0.273286	4.07118	4.53597	0.0331896	0.660446
Znrd1as	0.443061	2.47279	4.53366	0.0332345	0.660446
Fdxr	-0.32338	3.09399	4.52216	0.0334586	0.661308
Zfp618	-0.382556	3.44438	4.52405	0.0334216	0.661308
C030013C21Rik	0.820073	0.812744	4.51394	0.0336197	0.661826
Cr2	-0.874123	1.03022	4.51513	0.0335963	0.661826
Stag3	0.7684	1.21399	4.51352	0.0336279	0.661826
Wdr5b	0.526393	2.05519	4.51015	0.0336943	0.662194
1810020O05Rik	0.84046	1.31428	4.48401	0.0342133	0.662554
5430405H02Rik	0.719251	1.75146	4.40318	0.035872	0.662554
Adsl	0.400371	2.85541	4.48676	0.0341585	0.662554
Atp1a2	-0.165121	10.8111	4.39689	0.0360045	0.662554
B3galnt2	0.329095	5.10421	4.41069	0.0357144	0.662554
Bmf	0.57425	1.75307	4.42674	0.03538	0.662554
C1qtnf2	-1.10185	0.512356	4.48975	0.0340986	0.662554
Cd55	0.771576	1.35287	4.47749	0.0343442	0.662554
Clec3b	-0.630877	1.82228	4.40659	0.0358002	0.662554
Clrn1	-0.711574	1.67907	4.48033	0.0342871	0.662554
Dbp	-0.338239	5.26932	4.41505	0.0356231	0.662554
Dnajc1	-0.252653	6.62926	4.40688	0.0357943	0.662554
Eif4ebp2	-0.575084	1.77024	4.424	0.0354369	0.662554
Eri1	-0.243751	4.51915	4.47804	0.0343331	0.662554
Exoc7	-0.236911	4.51298	4.46107	0.0346758	0.662554
Gclm	-0.298148	3.80326	4.40279	0.0358802	0.662554
Gm10373	0.99912	0.107748	4.45432	0.034813	0.662554
Gm14005	0.989477	0.0710122	4.44059	0.0350941	0.662554
Gm6297	0.63137	1.06335	4.41791	0.0355636	0.662554
Gna13	-0.225398	6.68961	4.42326	0.0354522	0.662554
Hdac6	0.257721	4.15994	4.43017	0.0353089	0.662554
Hpca	0.313234	9.43095	4.43669	0.0351744	0.662554
Iffo1	0.293458	3.723	4.42809	0.0353521	0.662554
Limd2	0.244767	5.5172	4.44665	0.0349698	0.662554
Ly6c1	-0.318558	5.40245	4.44789	0.0349444	0.662554
Mapk1	0.204361	9.81749	4.4647	0.0346022	0.662554
Morn1	0.780883	1.20134	4.40965	0.0357362	0.662554
Mospd2	0.347845	4.00626	4.48776	0.0341383	0.662554
Mrpl22	0.344506	2.84531	4.48462	0.0342012	0.662554
Mrps18c	0.244538	5.49829	4.4848	0.0341976	0.662554
Msc	-0.435249	3.23327	4.43694	0.0351693	0.662554
Myo1h	-0.89318	0.376281	4.4102	0.0357246	0.662554
Nacc2	-0.221434	7.47798	4.41402	0.0356447	0.662554
Nck2	0.281994	6.08596	4.43773	0.035153	0.662554
Opa3	-0.386862	4.07151	4.49565	0.0339812	0.662554
Pdcl3	0.340338	4.86955	4.39462	0.0360525	0.662554
Ppp1r14b	0.50546	3.17483	4.42497	0.0354168	0.662554
Ppp1r3b	-0.533859	2.48828	4.42958	0.0353211	0.662554
Prdx6	-0.190446	7.75747	4.48049	0.0342839	0.662554
Prtg	0.387141	3.3887	4.47083	0.0344782	0.662554
Rad54l	0.501646	1.77246	4.42571	0.0354013	0.662554
Sec13	0.275243	4.83064	4.39568	0.03603	0.662554
Smim1	-0.459806	2.63532	4.42315	0.0354546	0.662554
Snapc3	-0.286663	5.08659	4.47349	0.0344247	0.662554
Snhg11	-0.212822	10.6099	4.42032	0.0355134	0.662554
Tmem45a	1.12821	0.130964	4.44859	0.0349301	0.662554
Tor4a	0.706796	1.47936	4.46251	0.0346465	0.662554
Uggt2	0.252601	4.12646	4.39998	0.0359394	0.662554
Vsig10	-0.8947	0.437436	4.44366	0.035031	0.662554
Ascl2	1.14568	0.349871	4.38961	0.0361586	0.662749
Prkci	0.212038	6.52022	4.39008	0.0361485	0.662749
Chrna4	-0.462623	4.45633	4.38112	0.0363392	0.665179
1700030C10Rik	0.549839	2.50475	4.35802	0.0368352	0.665859
Anxa2	-0.320157	3.42821	4.35701	0.036857	0.665859
Atad1	0.164333	8.22713	4.36391	0.0367081	0.665859
Bphl	0.264284	4.11188	4.36069	0.0367774	0.665859
Ccl9	0.486427	2.36244	4.36229	0.0367428	0.665859
Efhc1	0.693742	0.912226	4.35176	0.0369707	0.665859
Fam110b	0.196903	6.22872	4.36735	0.036634	0.665859
Klhl14	-0.993664	0.240621	4.36535	0.036677	0.665859
Mrpl23	0.327945	3.61089	4.37068	0.0365625	0.665859
Plxnc1	-0.24274	6.23935	4.3504	0.0370002	0.665859
Slc25a16	0.490439	5.23514	4.35489	0.0369029	0.665859
Tbx15	-0.68059	1.00346	4.35049	0.0369983	0.665859
Timp2	-0.328704	8.78406	4.35327	0.036938	0.665859
Mrps21	0.320204	3.84776	4.333	0.0373804	0.671231
Smc1a	-0.195956	6.78483	4.33107	0.0374228	0.671231
Zic2	-0.313376	5.80797	4.33011	0.0374438	0.671231
Adra2a	-0.449586	4.33607	4.31916	0.0376854	0.673821
Mrc2	-1.03856	0.148393	4.31933	0.0376817	0.673821
Mblac1	0.350327	3.02735	4.31671	0.0377398	0.673924
Lrrc49	-0.289049	3.90473	4.31421	0.0377954	0.67405
Aebp1	-0.812065	1.88566	4.30834	0.0379259	0.674458
Arhgap36	-0.987927	0.914262	4.30666	0.0379634	0.674458
Ermard	0.454913	1.86451	4.30663	0.0379641	0.674458
Chgb	0.238124	8.6043	4.30388	0.0380255	0.674686
Creb1	-0.170869	7.13215	4.29363	0.0382553	0.677896
Abhd6	-0.254145	4.79253	4.29057	0.0383243	0.678251
Akap12	-0.345898	5.51575	4.28704	0.038404	0.678797
Celf4	0.299106	10.5141	4.28161	0.0385269	0.680022
Galnt9	-0.202369	5.6	4.27965	0.0385713	0.680022
Tctex1d2	0.241113	4.73908	4.27405	0.0386985	0.681398
Cry1	-0.32295	4.08988	4.26926	0.0388078	0.682456
Trim24	0.28498	4.48729	4.26507	0.0389037	0.683277
Peli2	0.216046	5.66031	4.25778	0.039071	0.685348
Apoo	0.368894	3.09871	4.25176	0.0392098	0.685448
Atp6v1a	0.202901	10.1348	4.2511	0.0392249	0.685448
Eps15l1	0.226988	4.61438	4.25359	0.0391673	0.685448
Fkbpl	0.340011	3.568	4.24815	0.039293	0.685774
2210408F21Rik	-0.344275	3.54433	4.15218	0.0415809	0.685877
3110056K07Rik	-0.675548	1.19788	4.16369	0.0412994	0.685877
4831440E17Rik	0.412589	3.04882	4.09457	0.0430211	0.685877
AI115009	0.493764	3.11888	4.10058	0.0428686	0.685877
Abca8a	-0.360771	4.49871	4.18665	0.0407435	0.685877
Acr	0.848353	0.627449	4.09675	0.0429656	0.685877
Adhfe1	-0.319616	4.3853	4.16032	0.0413815	0.685877
Adra1d	0.280761	4.68474	4.08988	0.0431408	0.685877
Ankrd12	-0.16979	7.06899	3.9943	0.0456545	0.685877
Armcx3	0.360495	3.4782	4.13523	0.0419993	0.685877
Arpin	0.428866	2.19472	4.04355	0.0443404	0.685877
Atf6	0.285013	5.91442	4.05827	0.0439556	0.685877
Atp13a5	-0.312062	3.66177	4.12819	0.0421743	0.685877
Atp2b3	0.233665	7.81409	4.1389	0.0419085	0.685877
Bcl9l	-0.226681	5.4097	4.07276	0.0435801	0.685877
Bnip3	-0.162017	7.38012	4.17329	0.0410661	0.685877
C430049B03Rik	-0.486028	1.8704	4.23539	0.0395895	0.685877
Camk2n2	-0.326238	6.12452	4.08647	0.0432279	0.685877
Cby1	-0.362193	2.9719	4.17984	0.0409077	0.685877
Ccdc163	-0.834564	0.499217	4.14652	0.0417201	0.685877
Cdc27	0.162976	6.5479	4.13307	0.0420531	0.685877
Cdk7	-0.169638	6.31021	4.11146	0.0425937	0.685877
Cebpd	0.400291	4.74192	4.03894	0.0444618	0.685877
Cep290	-0.26678	3.82384	4.04129	0.0443998	0.685877
Ckb	-0.274205	9.46689	4.13731	0.0419478	0.685877
Clec4e	0.695754	0.946842	4.21778	0.0400024	0.685877
Clip1	-0.146463	7.20159	4.07054	0.0436373	0.685877
Csf2rb2	0.814909	0.585166	3.99323	0.0456835	0.685877
Cybb	0.367282	4.02468	4.09759	0.0429443	0.685877
Cyp19a1	-0.882872	0.324273	4.08897	0.0431639	0.685877
Ddx10	-0.254816	4.86956	4.11332	0.0425467	0.685877
Diras1	-0.2166	5.04124	4.04612	0.0442729	0.685877
Dnmt3b	0.687798	0.747047	4.0716	0.0436101	0.685877
Ebf2	-0.807933	0.703045	4.00257	0.0454309	0.685877
Eif2ak4	0.244421	4.18255	4.16175	0.0413466	0.685877
Emc4	0.524927	2.75999	4.05633	0.044006	0.685877
Epha8	-0.771293	0.872957	4.22479	0.0398375	0.685877
Fabp5	0.179074	5.69825	3.99852	0.0455403	0.685877
Fam204a	0.23558	5.14634	4.04369	0.0443367	0.685877
Fhl2	0.29857	5.40592	4.23674	0.0395581	0.685877
Fitm2	0.579242	1.42245	4.01263	0.0451608	0.685877
Fntb	-0.246624	4.16323	4.10472	0.0427638	0.685877
Folr1	1.29833	2.41565	4.21022	0.0401812	0.685877
Foxg1	0.18798	8.28787	4.02197	0.0449112	0.685877
Frs2	0.261675	4.50042	3.99611	0.0456053	0.685877
Fstl3	-0.806114	0.715018	4.02443	0.0448457	0.685877
Fut9	-0.336115	7.48158	4.17571	0.0410073	0.685877
Gcn1l1	-0.445693	2.36545	4.15229	0.0415782	0.685877
Gdi1	0.218997	6.69232	4.18962	0.0406722	0.685877
Gdpd5	-0.553689	1.46795	4.13998	0.0418816	0.685877
Gemin6	0.326972	3.40752	4.00623	0.0453324	0.685877
Gjb1	-0.247994	4.58309	4.17656	0.0409868	0.685877
Gm10125	-0.743426	0.716836	4.18558	0.0407691	0.685877
Gnb1l	-0.566733	1.60219	4.2031	0.0403502	0.685877
Gprasp2	-0.177166	7.27929	3.99483	0.0456401	0.685877
H1f0	0.19202	7.07539	4.14368	0.0417903	0.685877
Hapln4	-0.230368	5.04019	4.0502	0.0441662	0.685877
Heatr3	0.322964	5.27366	4.0213	0.0449292	0.685877
Hivep3	-0.284552	4.72613	4.16142	0.0413547	0.685877
Hspe1	0.168491	6.80081	3.98997	0.045772	0.685877
Hyou1	0.247464	5.80396	4.21775	0.0400032	0.685877
Isoc2b	-0.45233	2.01333	4.01435	0.0451146	0.685877
Isyna1	-0.262861	4.62088	4.15895	0.041415	0.685877
L3hypdh	-0.607774	1.08041	4.07596	0.0434975	0.685877
Las1l	-0.245019	4.22612	4.13218	0.0420752	0.685877
Lppr1	0.451112	2.13833	4.10471	0.0427638	0.685877
Lrtm2	-0.222267	7.21073	4.15334	0.0415525	0.685877
Mastl	0.824348	0.574417	4.01787	0.0450205	0.685877
Mepce	-0.225889	5.02817	4.03586	0.044543	0.685877
Mfap1b	-0.724344	1.20321	4.13955	0.0418923	0.685877
Mlc1	-0.165101	8.96814	4.21371	0.0400986	0.685877
Mok	-0.806078	0.388151	4.04762	0.0442337	0.685877
Mrps34	0.229589	5.54136	4.11446	0.0425181	0.685877
Ndufb3	0.16805	9.45192	4.10954	0.042642	0.685877
Ndufs3	0.249632	5.02503	4.09385	0.0430394	0.685877
Nfasc	-0.173376	7.59601	4.00984	0.0452354	0.685877
Nkain1	-0.196125	6.91678	4.15774	0.0414446	0.685877
Nrsn2	-0.231356	5.22487	4.06422	0.0438009	0.685877
Ntrk3	-0.145367	7.53639	4.06221	0.0438531	0.685877
Paqr4	-0.201804	6.07776	3.99808	0.0455521	0.685877
Pet100	0.298818	3.87585	4.04796	0.0442248	0.685877
Pfn2	0.273589	9.65317	4.124	0.042279	0.685877
Pgp	-0.204427	5.03338	4.00122	0.0454672	0.685877
Piezo1	-0.46318	2.20186	4.11849	0.042417	0.685877
Plekhb2	-0.19371	7.72506	3.9992	0.0455218	0.685877
Plk2	0.243976	6.20748	4.10316	0.0428033	0.685877
Pnck	-0.252632	6.78874	4.20918	0.0402058	0.685877
Ptchd1	-0.357982	3.58171	3.9975	0.0455678	0.685877
Rad51ap2	0.565322	1.40314	4.1266	0.0422141	0.685877
Ramp2	-0.341406	4.36036	4.02254	0.0448959	0.685877
Rasgrp1	0.18238	8.40276	4.12645	0.0422179	0.685877
Rbfox3	-0.158777	8.98053	4.0823	0.0433346	0.685877
Rbm19	-0.567948	1.93944	4.10855	0.042667	0.685877
Rgs9	-0.387457	2.92051	4.01186	0.0451813	0.685877
Rlbp1	0.299302	4.30948	4.2304	0.039706	0.685877
Rorb	-0.30221	5.19122	4.14179	0.041837	0.685877
Rps16	0.164064	7.07394	4.10755	0.0426923	0.685877
Rufy2	-0.224057	4.74238	4.02707	0.0447756	0.685877
Samd14	-0.261405	4.02426	4.02769	0.0447592	0.685877
Samd4	-0.222113	6.80415	4.20722	0.0402521	0.685877
Scly	-0.396405	3.7212	3.98987	0.0457746	0.685877
Senp7	0.171094	6.32378	4.01941	0.0449796	0.685877
Sez6l	0.191371	6.3063	3.99794	0.0455559	0.685877
Slc16a6	0.232607	5.19945	4.05567	0.0440233	0.685877
Slc35f5	0.183207	6.85818	4.18903	0.0406865	0.685877
Slc38a4	-0.56763	2.37236	4.10846	0.0426693	0.685877
Slc39a14	0.423337	3.12617	4.24266	0.0394203	0.685877
Slc7a3	-0.33543	4.42321	4.17041	0.0411359	0.685877
Snhg8	0.296324	7.93177	4.19637	0.0405105	0.685877
Snrpb2	0.167008	7.88638	4.17909	0.0409257	0.685877
St6galnac5	0.268343	6.23845	4.18189	0.0408581	0.685877
Stk4	-0.172425	6.15237	4.03394	0.0445936	0.685877
Tal1	-0.638191	2.58152	4.1172	0.0424494	0.685877
Tdo2	0.455672	3.21317	4.16293	0.0413179	0.685877
Tef	-0.237594	9.68605	4.08923	0.0431573	0.685877
Tmem114	0.534418	2.62566	4.22684	0.0397895	0.685877
Tmem261	0.210315	5.04931	4.21725	0.040015	0.685877
Tnnt2	-0.916933	0.812553	4.20945	0.0401994	0.685877
Trpm4	0.574554	1.52771	4.08645	0.0432284	0.685877
Trpm6	-0.979959	0.272587	4.04474	0.0443092	0.685877
Tsen54	0.377368	2.65688	4.04257	0.0443663	0.685877
Tspan18	0.42176	4.00399	4.09711	0.0429565	0.685877
Ttc23	-0.800387	0.499087	4.02262	0.044894	0.685877
Ttll7	-0.139319	7.65094	3.99786	0.045558	0.685877
Unc119b	0.321851	3.73841	4.1619	0.041343	0.685877
Usp10	-0.256857	3.97071	4.04181	0.0443862	0.685877
Ydjc	-0.279134	4.53991	4.00262	0.0454296	0.685877
Zfp473	-0.902896	0.128777	4.04599	0.0442763	0.685877
Zfp703	-0.36636	4.77347	4.17912	0.040925	0.685877
Zfp874a	0.301208	3.03821	4.02426	0.0448504	0.685877
Zmat3	-0.190172	7.75443	4.15804	0.0414372	0.685877
Car8	-0.481261	3.17052	3.98103	0.0460154	0.688
Mpp5	-0.241943	5.78678	3.98184	0.0459933	0.688
Pdxdc1	-0.259485	4.33019	3.97794	0.0460998	0.688519
Atrn	0.248711	7.8101	3.97056	0.0463025	0.689321
Fdft1	0.337634	4.19908	3.97372	0.0462155	0.689321
Smchd1	-0.249967	4.68373	3.97104	0.046289	0.689321
AW551984	-0.526274	2.40265	3.94748	0.0469417	0.690273
Bloc1s2	0.291908	3.813	3.94708	0.0469526	0.690273
Ccbe1	0.548664	4.15178	3.95643	0.0466926	0.690273
Col25a1	0.445838	5.05931	3.95187	0.0468194	0.690273
Colec11	0.706174	1.09435	3.94314	0.0470629	0.690273
Eif3e	0.186674	7.7037	3.95454	0.0467452	0.690273
Gareml	-0.456682	2.35784	3.95071	0.0468517	0.690273
Gls	0.150076	8.36331	3.94473	0.0470185	0.690273
Irak1	0.156866	6.21508	3.96115	0.0465619	0.690273
Ndst4	-0.809506	0.881732	3.96008	0.0465915	0.690273
Pde12	0.250512	3.90498	3.95288	0.0467913	0.690273
Prorsd1	0.359347	3.11865	3.95887	0.0466251	0.690273
Tmem255b	-0.731902	0.793828	3.94409	0.0470364	0.690273
Trim25	0.308814	3.16766	3.95537	0.046722	0.690273
Fbxo2	-0.19911	7.57297	3.9389	0.0471815	0.691281
Ccnjl	0.323586	3.37102	3.9367	0.0472433	0.691457
Aldoc	-0.178489	10.5192	3.91744	0.0477877	0.691578
Arf5	0.403423	2.83004	3.90704	0.0480842	0.691578
Atp2a3	-0.492944	1.62042	3.90762	0.0480676	0.691578
Bcat2	-0.74343	1.22056	3.92676	0.0475234	0.691578
Cfap20	0.243884	5.45186	3.90131	0.0482484	0.691578
Cox15	0.307821	3.79831	3.93089	0.047407	0.691578
Epb4.1l3	-0.233025	6.57304	3.91918	0.0477382	0.691578
Fam102a	-0.188721	7.41885	3.91565	0.0478386	0.691578
Fbxo27	0.344073	3.25886	3.90339	0.0481888	0.691578
Gabrb1	0.269722	6.74188	3.91891	0.0477458	0.691578
Ogn	-0.695932	2.65123	3.91045	0.0479868	0.691578
Pisd	0.263301	5.44656	3.92723	0.0475103	0.691578
Rabl6	-0.167759	6.84191	3.90365	0.0481814	0.691578
Skil	0.174121	6.48791	3.91549	0.047843	0.691578
Slc20a2	0.431808	5.06507	3.91759	0.0477832	0.691578
Slc22a4	-0.858206	0.623337	3.91239	0.0479314	0.691578
Slc44a5	0.304369	6.58511	3.90265	0.0482099	0.691578
Strbp	-0.232739	10.575	3.90387	0.0481751	0.691578
Uba6	-0.262178	4.25081	3.93229	0.0473673	0.691578
Xkr6	-0.813544	0.582338	3.91553	0.047842	0.691578
Fpgs	-0.404919	2.28788	3.89558	0.0484132	0.693223
Clip2	-0.254409	4.91166	3.88533	0.0487096	0.693903
D330050G23Rik	0.6425	0.888533	3.88529	0.0487107	0.693903
Elp6	0.374903	2.96625	3.88609	0.0486875	0.693903
Srrm3	-0.219152	4.8135	3.89029	0.0485661	0.693903
Usp9x	-0.294174	4.07459	3.88645	0.0486773	0.693903
9330182L06Rik	-0.32222	4.42298	3.84808	0.0498028	0.69468
Ablim1	-0.187562	5.29088	3.84774	0.0498129	0.69468
Arhgap32	-0.385821	8.32899	3.8172	0.0507291	0.69468
Atf4	-0.24106	8.41175	3.81796	0.0507059	0.69468
Atg9b	-0.668113	0.973607	3.81426	0.050818	0.69468
Ccdc6	0.230853	5.16649	3.85973	0.0494583	0.69468
Ccl7	0.464833	1.92492	3.87858	0.048906	0.69468
Cdadc1	-0.173396	5.52581	3.84967	0.0497559	0.69468
Cmc2	-0.307838	4.15216	3.87058	0.0491396	0.69468
Eva1b	0.645507	0.92377	3.83486	0.0501973	0.69468
Fbxl4	0.341073	2.95108	3.8634	0.0493501	0.69468
Fen1	0.282503	3.71388	3.82822	0.0503964	0.69468
Glb1l2	0.945022	1.1407	3.82595	0.0504648	0.69468
Gm10336	-0.223238	4.33384	3.82112	0.0506105	0.69468
Gpatch11	-0.208855	5.05182	3.85093	0.0497184	0.69468
Gpr88	-1.16455	2.70557	3.81529	0.0507868	0.69468
Imp4	-0.361677	3.03025	3.82051	0.0506287	0.69468
Ino80e	0.372335	2.71267	3.87079	0.0491335	0.69468
Kcnn2	0.263438	5.27306	3.84633	0.0498548	0.69468
Kctd5	0.297443	5.12375	3.82135	0.0506036	0.69468
Lrrn2	0.212048	7.20215	3.82982	0.0503483	0.69468
Metrnl	-0.367852	3.09064	3.83326	0.0502451	0.69468
Mmd	0.218168	8.65317	3.84054	0.0500275	0.69468
Mras	-0.189233	7.46782	3.82423	0.0505164	0.69468
Mrpl57	0.225677	4.96175	3.86789	0.0492184	0.69468
Nampt	0.184527	6.49657	3.85228	0.0496783	0.69468
Ndufb10	0.152993	6.49636	3.84522	0.0498881	0.69468
Nup54	0.490236	1.47254	3.82634	0.0504531	0.69468
Pmch	-0.796821	1.63326	3.87726	0.0489444	0.69468
Pparg	-0.940111	0.372014	3.84775	0.0498127	0.69468
Psen1	0.20984	4.73459	3.87484	0.0490151	0.69468
Ramp1	-0.177248	5.82758	3.85835	0.0494989	0.69468
Rasl11a	0.76715	2.08141	3.83856	0.0500865	0.69468
Rchy1	0.159626	6.11103	3.8231	0.0505507	0.69468
Sebox	0.434555	2.02615	3.81514	0.0507913	0.69468
Stx3	0.187681	6.04899	3.85282	0.0496626	0.69468
Tagln	-0.901924	0.356882	3.86317	0.049357	0.69468
Tmem115	-0.313099	3.12358	3.84819	0.0497997	0.69468
Tmem130	-0.223119	7.61581	3.81918	0.0506691	0.69468
Traf5	-0.664102	1.38258	3.82812	0.0503994	0.69468
Vps72	-0.223262	5.26626	3.83549	0.0501783	0.69468
Clec7a	0.64458	2.14869	3.80449	0.0511154	0.696404
Neurod1	0.197058	6.01621	3.80586	0.0510737	0.696404
Slc16a13	-0.650816	0.972133	3.80251	0.0511758	0.696404
Ube2g2	0.238828	5.807	3.80479	0.0511063	0.696404
Usp13	-0.306046	5.00047	3.80188	0.0511951	0.696404
Faf2	0.24528	4.26194	3.79691	0.0513474	0.697159
Gar1	0.275444	4.5739	3.79678	0.0513511	0.697159
Cpsf3	0.21617	4.81069	3.78199	0.0518072	0.697963
Emp3	-0.578809	1.71919	3.78066	0.0518483	0.697963
Fam151b	0.243281	3.85488	3.77694	0.0519637	0.697963
Fam19a2	0.289867	5.32068	3.783	0.0517758	0.697963
Gm4477	-0.474942	1.76492	3.778	0.0519306	0.697963
Mcat	0.343478	2.96319	3.78892	0.0515928	0.697963
Mfhas1	-0.179905	5.2976	3.77917	0.0518943	0.697963
Myl1	0.860073	0.240908	3.78833	0.0516111	0.697963
Pantr2	0.688593	0.942112	3.78712	0.0516484	0.697963
Tuba1c	0.68846	4.63963	3.78396	0.0517461	0.697963
Uvssa	0.242209	4.85818	3.78252	0.0517906	0.697963
Ago2	-0.42259	2.58924	3.75854	0.0525383	0.700932
Anks1	-0.237243	4.54983	3.76634	0.0522939	0.700932
Commd1	0.308717	4.5459	3.76155	0.052444	0.700932
Gnl2	0.257174	4.77997	3.76793	0.0522444	0.700932
Hmga2-ps1	0.706632	0.842329	3.75965	0.0525035	0.700932
Phf11d	0.716859	0.808871	3.76197	0.0524306	0.700932
Tgfb2	0.455804	5.774	3.76315	0.0523936	0.700932
Ifngr2	0.286681	4.54986	3.75513	0.0526458	0.701691
2700029M09Rik	0.21796	6.25395	3.74321	0.0530226	0.704008
Bambi	0.472961	2.41143	3.74336	0.0530178	0.704008
Endov	0.338297	3.26284	3.74639	0.0529216	0.704008
Pknox1	-0.241324	4.11822	3.74719	0.0528962	0.704008
Cyp51	0.189111	6.55028	3.73955	0.0531387	0.704202
Tm2d1	0.274016	5.39382	3.74007	0.0531223	0.704202
Crispld1	-0.321495	3.67575	3.7327	0.0533571	0.706421
Npc1	-0.189851	5.05617	3.72927	0.0534668	0.707199
1700052K11Rik	0.511778	2.61933	3.6985	0.0544614	0.708568
Acsl3	0.239831	9.09894	3.70052	0.0543957	0.708568
Acsl4	0.148285	7.73885	3.66839	0.0554538	0.708568
Adat1	-0.452642	2.65223	3.71511	0.053922	0.708568
Adcy4	-0.548256	1.20744	3.66471	0.0555763	0.708568
Adcy9	0.162736	7.46434	3.6839	0.0549401	0.708568
Ago3	-0.611694	1.31045	3.66787	0.0554709	0.708568
Ak5	0.321205	4.33728	3.69968	0.0544229	0.708568
Arhgap30	0.533917	2.32896	3.70451	0.0542656	0.708568
Asf1a	-0.319151	3.63858	3.69151	0.0546901	0.708568
B3galt2	-0.174884	5.43307	3.66832	0.0554562	0.708568
Btbd11	-0.30397	3.90577	3.71634	0.0538825	0.708568
Cacna1d	-0.167185	6.27983	3.71056	0.0540693	0.708568
Carf	0.27953	5.2192	3.68821	0.0547985	0.708568
Ccdc13	-0.659111	1.11126	3.7176	0.0538418	0.708568
Chst3	0.598989	1.21887	3.65749	0.0558177	0.708568
Clvs2	0.248491	5.3295	3.6499	0.0560726	0.708568
Crygn	0.902117	0.108604	3.71743	0.0538472	0.708568
Cxcl2	0.358803	2.68895	3.67327	0.0552915	0.708568
Cyb561d1	-0.276176	3.7107	3.69364	0.0546204	0.708568
D330050I16Rik	0.8545	0.393496	3.66385	0.0556051	0.708568
Dnajb14	-0.257692	5.19786	3.71948	0.0537811	0.708568
Exo5	0.391022	2.47175	3.67933	0.055091	0.708568
Fam110a	-0.294922	3.93915	3.65012	0.0560652	0.708568
Fam162a	0.192938	5.99612	3.67612	0.0551972	0.708568
Fam63a	-0.24036	5.22913	3.65466	0.0559126	0.708568
Fto	-0.196689	7.52276	3.69608	0.0545405	0.708568
Gm20751	0.553598	2.06538	3.67571	0.0552109	0.708568
Gng10	0.212322	7.40195	3.69093	0.0547092	0.708568
Kcnc1	-0.177028	6.20462	3.67501	0.0552338	0.708568
Krt10	0.313294	4.57817	3.65475	0.0559097	0.708568
Lcn2	0.429744	2.24238	3.72294	0.0536699	0.708568
Lgr4	0.227125	5.84895	3.65401	0.0559344	0.708568
Lmf1	-0.341055	2.94199	3.65758	0.0558148	0.708568
Med31	0.296093	4.52418	3.68732	0.0548278	0.708568
Mfsd5	-0.235472	5.31756	3.70414	0.0542777	0.708568
Ncf1	0.382075	3.01478	3.70926	0.0541113	0.708568
Olig2	-0.23435	4.26999	3.67054	0.0553824	0.708568
Pef1	-0.185131	4.84702	3.67447	0.0552518	0.708568
Poc1a	0.341865	2.68784	3.71035	0.0540761	0.708568
Prepl	-0.271846	3.92738	3.6996	0.0544254	0.708568
Rgp1	0.245199	4.44793	3.69937	0.0544329	0.708568
Slc35f4	-0.311584	3.53974	3.70267	0.0543253	0.708568
Slc39a6	0.188963	6.55332	3.66751	0.055483	0.708568
Snca	0.185739	10.4932	3.67514	0.0552295	0.708568
St13	-0.201767	5.24954	3.65373	0.0559437	0.708568
Stk35	-0.262073	4.77204	3.65122	0.0560282	0.708568
Tbc1d1	0.219401	4.26499	3.65954	0.0557491	0.708568
Vipr2	-1.18298	0.947066	3.68218	0.054997	0.708568
9430065F17Rik	0.619983	0.950352	3.62656	0.0568643	0.708799
Cd1d1	1.00721	0.223876	3.64451	0.0562544	0.708799
Chd5	-0.234192	6.54987	3.64008	0.0564043	0.708799
Epsti1	-0.555926	1.33205	3.62668	0.0568602	0.708799
Exosc2	0.299885	3.14121	3.64395	0.0562733	0.708799
Gm13157	0.644753	1.23087	3.64242	0.0563252	0.708799
Gpr107	-0.205353	4.86423	3.63535	0.0565648	0.708799
Hmgcs1	0.161215	8.31412	3.63982	0.056413	0.708799
Islr2	0.223715	7.01331	3.63578	0.05655	0.708799
Itga7	0.368169	2.85201	3.63484	0.056582	0.708799
Magef1	0.237621	4.31351	3.63336	0.0566324	0.708799
Prrx1	-0.325982	3.70788	3.62999	0.056747	0.708799
Rapgef3	-0.219344	5.15499	3.62461	0.0569309	0.708799
Rdh10	0.297199	4.10838	3.62763	0.0568275	0.708799
Tusc1	0.253394	4.28247	3.63305	0.0566429	0.708799
Zfp389	-0.743978	0.682484	3.62378	0.0569594	0.708799
Znrd1	0.206236	4.26224	3.62632	0.0568723	0.708799
Golga1	-0.198051	4.62472	3.62033	0.0570776	0.709381
Lxn	0.237903	4.75347	3.61934	0.0571114	0.709381
Uevld	-0.370468	2.64173	3.61794	0.0571595	0.709381
AI413582	-0.269727	5.32805	3.61301	0.0573292	0.710218
Scmh1	0.296658	4.06591	3.61301	0.0573293	0.710218
Txndc12	-0.334948	3.24574	3.60687	0.0575414	0.712209
Traf6	0.272769	3.85457	3.60529	0.0575961	0.712252
Adamts4	0.314435	3.35457	3.59884	0.0578201	0.712481
Cenpv	0.270698	3.91991	3.59996	0.0577809	0.712481
Pno1	0.222225	4.9263	3.60322	0.0576677	0.712481
Timp4	-0.266711	5.86098	3.59922	0.0578069	0.712481
Smim8	0.199457	4.49868	3.59588	0.057923	0.713116
Gas2l3	0.507821	1.98381	3.59104	0.058092	0.713298
Irx3	-0.90349	1.73949	3.59134	0.0580816	0.713298
Ttc34	0.795433	0.724827	3.5911	0.0580898	0.713298
Gm20063	-0.742565	1.05328	3.58691	0.0582364	0.714439
9630013A20Rik	0.804142	1.73133	3.54095	0.059871	0.716855
Aldh1b1	0.223965	4.68372	3.52273	0.0605328	0.716855
Bean1	-0.383208	3.41745	3.54105	0.0598674	0.716855
Cacna1i	-0.360336	3.48052	3.52368	0.0604979	0.716855
Ccdc115	0.159617	6.38023	3.54976	0.0595541	0.716855
Chdh	0.472581	2.31169	3.5546	0.0593807	0.716855
Cyp4f15	-0.293948	3.75325	3.55603	0.0593296	0.716855
Dbil5	-0.846321	0.237365	3.55652	0.0593121	0.716855
Defb11	1.61917	1.13039	3.52096	0.0605973	0.716855
Dhrs7	0.259094	4.94381	3.56037	0.0591744	0.716855
Dock11	0.328644	3.34714	3.57392	0.0586936	0.716855
Ehmt1	0.179496	5.80549	3.53198	0.060196	0.716855
Fgd1	-0.298413	3.60932	3.55677	0.0593032	0.716855
Fgfr1	0.24677	7.49207	3.54417	0.0597551	0.716855
Fnbp4	0.238547	5.18296	3.54124	0.0598606	0.716855
Gm9079	0.557477	1.30819	3.53145	0.0602152	0.716855
Hectd2	0.253043	5.42222	3.56916	0.058862	0.716855
Klf4	-0.502947	3.09366	3.54307	0.0597948	0.716855
Msl3	-0.181797	5.06906	3.52325	0.0605135	0.716855
Nrn1l	-1.187	-0.147347	3.56222	0.0591086	0.716855
Pde4d	-0.225926	5.06507	3.5208	0.0606033	0.716855
Pdp1	-0.291432	7.58708	3.5295	0.0602861	0.716855
Plcl1	-0.285634	5.08952	3.5275	0.0603589	0.716855
Ppp1r1a	0.170776	6.08744	3.54014	0.0599002	0.716855
Prkar1b	-0.241542	8.82013	3.54817	0.0596112	0.716855
Prune2	-0.151273	6.87976	3.52216	0.0605534	0.716855
Raver1	0.458464	2.12277	3.56614	0.0589691	0.716855
Rev3l	0.22076	5.47303	3.56684	0.0589444	0.716855
Rgs10	0.236159	4.16003	3.53739	0.0599999	0.716855
Rnf214	0.239776	4.88315	3.55468	0.0593778	0.716855
Rnpc3	-0.222414	4.8375	3.53508	0.0600835	0.716855
Rsrc1	-0.193298	6.03901	3.5314	0.0602168	0.716855
Soga1	0.22567	5.39629	3.5295	0.0602858	0.716855
Ssbp2	-0.202133	6.33322	3.5298	0.0602751	0.716855
Tm6sf1	-0.337007	4.36271	3.55782	0.0592656	0.716855
Twistnb	0.151909	6.57779	3.57368	0.0587021	0.716855
Txn1	0.182887	7.5616	3.57673	0.0585944	0.716855
Unc13a	0.221937	6.51036	3.5418	0.0598406	0.716855
Uqcc1	-0.171072	5.36061	3.54352	0.0597784	0.716855
Vkorc1l1	0.197361	5.69565	3.57611	0.0586162	0.716855
Zbtb10	0.30664	3.39426	3.52581	0.0604202	0.716855
Zranb3	0.32615	3.26043	3.54248	0.0598159	0.716855
Pigv	-0.334645	2.65802	3.51621	0.0607713	0.71823
Gorab	0.271512	3.10347	3.5096	0.0610143	0.720488
Cpne4	0.327806	6.43974	3.50053	0.0613491	0.720761
Pdgfb	0.289382	5.91461	3.50274	0.0612672	0.720761
Shoc2	-0.2018	5.36591	3.50086	0.0613371	0.720761
Stx5a	-0.286387	4.10695	3.50244	0.0612785	0.720761
Syne4	-0.470515	1.58601	3.50157	0.0613107	0.720761
Xpa	0.319426	3.93774	3.50564	0.0611604	0.720761
Cnr1	0.302247	6.9201	3.49538	0.0615402	0.721924
Cpne6	0.231545	8.20397	3.49506	0.0615521	0.721924
Pdcd2l	0.368745	3.97377	3.49198	0.0616668	0.722658
AI662270	-0.796542	0.83315	3.48821	0.0618075	0.72315
Sema6c	-0.307988	3.67492	3.48806	0.061813	0.72315
1810032O08Rik	0.668226	0.821122	3.4761	0.0622614	0.724828
Cox17	0.220964	7.76036	3.47995	0.0621168	0.724828
Deptor	-0.349122	5.39495	3.47414	0.0623351	0.724828
Fndc3b	-0.200848	5.25784	3.47372	0.062351	0.724828
Olfm1	0.16999	10.1204	3.4741	0.0623365	0.724828
Reep4	-0.345533	3.36952	3.4734	0.0623628	0.724828
Slc22a3	-0.943215	0.450785	3.47676	0.0622365	0.724828
Vipas39	-0.238625	4.27777	3.47171	0.0624266	0.724828
Zmynd19	-0.416711	2.1482	3.47215	0.0624102	0.724828
Anxa3	-0.287891	3.35855	3.46797	0.062568	0.72563
Ctr9	-0.175284	6.29999	3.46694	0.0626069	0.72563
Fermt3	-0.435422	2.19577	3.46574	0.0626526	0.72563
Cnrip1	0.15025	7.3842	3.46316	0.0627502	0.726154
1600012H06Rik	0.228327	4.03155	3.45379	0.0631069	0.726164
AI593442	0.178665	8.14604	3.45518	0.0630538	0.726164
Adgra3	-0.581896	1.18147	3.4531	0.0631332	0.726164
Cecr2	0.255436	4.0344	3.45574	0.0630325	0.726164
Ece1	0.20174	5.37311	3.45599	0.0630229	0.726164
Gab1	-0.193235	5.07989	3.45282	0.0631441	0.726164
Tmcc1	-0.167725	7.15362	3.45309	0.0631336	0.726164
Tubb3	-0.225774	9.17392	3.45215	0.0631697	0.726164
Fam76b	0.160455	5.66784	3.44919	0.0632828	0.726261
Pdzd7	0.879647	0.498432	3.4501	0.063248	0.726261
6330409D20Rik	-0.766239	0.753119	3.41832	0.0644765	0.726883
Afg3l1	-0.195203	5.39013	3.43291	0.0639095	0.726883
Amotl1	-0.399114	6.22754	3.43581	0.0637972	0.726883
Arhgap10	-0.445708	1.9869	3.42229	0.0643217	0.726883
Atf5	-0.200238	6.34907	3.41799	0.0644896	0.726883
Cpxm2	-0.58844	1.20621	3.4428	0.063528	0.726883
Gng7	0.241511	4.96562	3.43573	0.0638003	0.726883
Itga4	-0.199544	5.14848	3.42033	0.0643982	0.726883
Kitl	-0.323703	5.60287	3.4427	0.0635318	0.726883
Lyve1	-1.01751	0.434865	3.43591	0.0637934	0.726883
Mfn1	-0.177254	5.68103	3.42005	0.0644089	0.726883
Mirg	-0.216665	5.48933	3.43937	0.0636601	0.726883
Mrps36	-0.464215	2.97024	3.42304	0.0642927	0.726883
Mthfd1	0.244619	4.02149	3.44209	0.0635552	0.726883
Neurod6	0.243018	8.83377	3.43671	0.0637627	0.726883
Nts	0.306864	4.53937	3.42444	0.064238	0.726883
Pcp4	-0.239541	7.4293	3.42217	0.0643264	0.726883
Prkg1	0.456433	3.38589	3.41823	0.0644802	0.726883
Slc25a22	0.194687	6.44356	3.43037	0.0640078	0.726883
Slco1c1	0.22562	5.50231	3.42224	0.0643236	0.726883
Thoc6	-0.265743	3.66753	3.43108	0.0639802	0.726883
Tmem203	0.265064	3.2931	3.42238	0.0643181	0.726883
Fyn	0.247487	6.01648	3.41525	0.0645968	0.727162
Gins2	0.528818	2.1514	3.41301	0.0646844	0.727162
H3f3a	0.345627	3.89107	3.41437	0.0646312	0.727162
Mir3091	0.838623	0.736191	3.412	0.0647239	0.727162
Dnal4	0.170913	6.28773	3.40543	0.0649822	0.728081
Hr	-0.484995	2.82142	3.40192	0.0651206	0.728081
Lrrc61	0.330274	3.81616	3.40222	0.0651086	0.728081
Obscn	1.03821	0.0516897	3.40686	0.0649257	0.728081
Ptrf	-0.237449	6.49749	3.40837	0.0648663	0.728081
St8sia6	0.681779	1.26842	3.40407	0.0650357	0.728081
Stmnd1	-1.02385	0.127314	3.39669	0.0653274	0.729805
Gm5087	0.987703	0.11441	3.39479	0.0654028	0.730003
Smtn	0.581703	1.17312	3.39359	0.0654503	0.730003
Cfap45	-0.747811	0.437429	3.39058	0.0655697	0.730747
Zfp934	0.675479	1.22454	3.38519	0.0657846	0.732554
Ezh1	-0.169394	5.38263	3.37828	0.0660609	0.733863
Lonrf1	-0.145578	6.97493	3.37943	0.0660147	0.733863
Zfp429	0.637275	1.01933	3.37912	0.0660274	0.733863
Aldh1l2	0.613514	1.48465	3.36559	0.0665716	0.736295
Calu	0.189837	6.27262	3.36787	0.0664797	0.736295
Mrps27	-0.268957	3.9677	3.36644	0.0665375	0.736295
Pdap1	-0.17857	6.34219	3.36645	0.0665372	0.736295
Pdk2	-0.206278	5.45344	3.36333	0.0666632	0.736295
Taf6	-0.379402	2.76226	3.36386	0.0666418	0.736295
Usp2	-0.164163	6.72413	3.37023	0.0663845	0.736295
Zmat4	-0.235746	5.56034	3.36231	0.0667043	0.736295
2310033P09Rik	-0.219196	5.07985	3.35786	0.0668851	0.736762
A830080D01Rik	-0.258326	3.88459	3.34001	0.0676143	0.736762
AF357425	-0.804855	0.762168	3.30035	0.0692651	0.736762
Acta2	-0.443018	3.37933	3.27409	0.070382	0.736762
Adamts20	0.300439	3.8475	3.33289	0.0679073	0.736762
Aifm3	-0.264472	3.97521	3.28637	0.0698573	0.736762
Amot	-0.206263	5.47428	3.29397	0.0695347	0.736762
Ankrd13c	0.510102	1.60971	3.25743	0.0711006	0.736762
Anxa1	-0.811476	0.880588	3.3559	0.0669647	0.736762
Apobec3	0.48714	2.74919	3.2562	0.0711539	0.736762
Arhgef1	-0.241922	4.72591	3.3414	0.0675573	0.736762
B4galnt4	0.357852	2.55631	3.28898	0.0697462	0.736762
Bhlhe41	-0.217616	6.19669	3.27717	0.0702498	0.736762
Bola2	0.165505	5.41455	3.28999	0.0697036	0.736762
Brinp2	-0.255926	4.88849	3.26052	0.0709668	0.736762
Cd274	0.510137	1.5361	3.26783	0.070651	0.736762
Cdh20	-0.267517	4.97779	3.32814	0.0681038	0.736762
Cdh4	-0.388529	4.01034	3.30132	0.0692241	0.736762
Cep170	0.186695	6.03814	3.35501	0.0670009	0.736762
Cracr2b	0.669986	1.07454	3.32336	0.0683021	0.736762
Dcc	0.191086	6.37769	3.34183	0.0675395	0.736762
Ddx3y	0.571984	5.63006	3.35779	0.0668876	0.736762
Degs1	0.168179	7.29509	3.29865	0.0693368	0.736762
Dip2b	-0.19286	6.00346	3.29827	0.0693528	0.736762
Dtd1	0.169875	6.18915	3.29495	0.0694934	0.736762
Ebag9	0.229326	4.99634	3.34298	0.0674921	0.736762
Elmo2	0.163135	7.23189	3.29426	0.0695226	0.736762
Enpp1	-0.413465	2.35895	3.3084	0.0689264	0.736762
Epb4.1	-0.216603	4.71329	3.25711	0.0711142	0.736762
Fam13c	0.309885	6.35747	3.28773	0.0697995	0.736762
Fam58b	0.271794	4.40144	3.31198	0.0687765	0.736762
Fbxo7	-0.201011	5.2814	3.31135	0.068803	0.736762
Gle1	0.167355	5.62917	3.33715	0.0677316	0.736762
Gpatch3	0.594111	0.853097	3.31338	0.0687181	0.736762
Grm8	-0.406959	3.62008	3.31751	0.0685456	0.736762
Haus1	0.336653	2.72188	3.26316	0.0708524	0.736762
Hdhd3	-0.562471	1.45197	3.30497	0.0690706	0.736762
Ina	-0.168402	7.42547	3.26571	0.0707423	0.736762
Ing1	-0.214864	7.39022	3.34897	0.0672472	0.736762
Invs	-0.326361	2.70418	3.33355	0.0678801	0.736762
Itk	1.13262	-0.238615	3.30447	0.0690918	0.736762
Klc4	-0.223339	4.43726	3.27363	0.0704019	0.736762
Klrg1	1.05683	-0.00915689	3.30036	0.0692648	0.736762
Lilr4b	0.993382	0.0542456	3.3506	0.0671804	0.736762
Lingo2	-0.267516	4.62372	3.30374	0.0691224	0.736762
Magi3	-0.213522	4.96807	3.30497	0.0690706	0.736762
Maneal	0.198782	4.99868	3.258	0.0710757	0.736762
Med17	0.156741	6.37462	3.27675	0.0702681	0.736762
Mrpl36	0.196661	4.20074	3.31081	0.0688255	0.736762
Mtmr3	0.201016	6.50347	3.329	0.0680681	0.736762
Naa40	0.256301	4.46914	3.30201	0.0691952	0.736762
Nadk2	0.392375	3.47995	3.32408	0.0682724	0.736762
Ncoa7	-0.132249	7.26451	3.25901	0.071032	0.736762
Ntrk2	-0.139854	8.71429	3.27992	0.0701323	0.736762
Nxph1	0.568534	3.3187	3.31973	0.068453	0.736762
Olfm3	-0.232814	5.51962	3.34623	0.0673593	0.736762
Oplah	-0.312813	3.78667	3.34799	0.0672873	0.736762
Osmr	0.515319	1.31941	3.33571	0.067791	0.736762
Pak7	-0.278979	6.31186	3.28851	0.0697664	0.736762
Per3	-0.193148	5.26643	3.28745	0.0698113	0.736762
Polr3b	-0.411942	2.76574	3.29508	0.0694877	0.736762
Pom121	-0.154494	5.66344	3.25791	0.0710797	0.736762
Ppp1r12a	-0.145185	6.94785	3.28053	0.0701064	0.736762
Ptgr1	0.541399	2.3474	3.28645	0.0698539	0.736762
Rab11fip5	-0.179652	6.02535	3.2783	0.0702017	0.736762
Rgs16	-0.611354	3.07777	3.2775	0.0702359	0.736762
Rian	-0.365061	3.45356	3.26732	0.0706731	0.736762
Rimklb	-0.187047	5.34966	3.32333	0.0683032	0.736762
Scx	0.757185	0.791155	3.26598	0.0707309	0.736762
Shisa6	0.481473	6.58647	3.2596	0.0710065	0.736762
Ska3	1.01597	0.0737991	3.32564	0.0682075	0.736762
Slc8a2	0.168543	7.05539	3.2852	0.069907	0.736762
Snhg6	0.601969	5.83227	3.27104	0.0705131	0.736762
St6galnac4	-0.20323	4.57129	3.25747	0.0710986	0.736762
Stard10	-0.451806	2.71072	3.27146	0.070495	0.736762
Stim1	-0.547471	1.92777	3.35174	0.0671342	0.736762
Sun2	-0.189328	4.77634	3.34638	0.0673532	0.736762
Tenm4	-0.171415	6.58956	3.30787	0.0689487	0.736762
Tm9sf3	0.248041	7.83044	3.35	0.0672049	0.736762
Tmem181c-ps	0.354815	3.63499	3.30972	0.0688713	0.736762
Trappc6a	0.357572	2.47487	3.28706	0.0698281	0.736762
Ttc37	0.79185	0.519598	3.26594	0.0707325	0.736762
Zfp456	-0.622389	0.652286	3.31162	0.0687915	0.736762
Efcc1	-0.348065	2.85428	3.25364	0.0712652	0.736814
Sfr1	-0.139375	8.39873	3.25378	0.0712589	0.736814
Lrp1b	-0.525189	2.36317	3.25206	0.0713336	0.736972
Shfm1	0.245947	6.49485	3.24925	0.0714562	0.737141
Tec	0.92302	0.241073	3.24925	0.0714561	0.737141
Acot2	0.263624	4.71647	3.24287	0.0717348	0.738368
Lrrtm4	0.168144	5.29912	3.24365	0.0717008	0.738368
Srsf12	0.216338	4.20242	3.24486	0.0716479	0.738368
Jph4	0.277659	8.03483	3.23941	0.0718863	0.738832
Scarf2	-0.865727	0.572846	3.23995	0.071863	0.738832
Camk1g	-0.273524	5.6028	3.23742	0.0719738	0.739183
Dzip3	-0.16791	7.06769	3.2362	0.0720273	0.739186
1810011O10Rik	-0.871401	1.19048	3.23468	0.0720945	0.739329
Ext2	0.317045	3.4395	3.2302	0.0722917	0.740256
Zfp704	0.247163	5.61572	3.23111	0.0722519	0.740256
Fam179b	-0.138433	6.66329	3.22798	0.0723898	0.740458
Tgfbr1	0.223536	4.53527	3.22646	0.0724572	0.740458
Usp15	-0.217179	5.02904	3.22614	0.0724715	0.740458
Sec24a	0.276649	4.79228	3.22407	0.072563	0.740847
Adamtsl1	0.357554	3.36898	3.21741	0.072859	0.741394
Arsk	-0.26285	3.90297	3.21685	0.0728838	0.741394
Btg1	-0.450884	5.86945	3.21907	0.072785	0.741394
Sec22b	0.162191	5.34225	3.21857	0.0728072	0.741394
Wdr70	-0.363421	3.5409	3.21945	0.0727681	0.741394
Cinp	0.408802	3.42101	3.21538	0.0729493	0.741517
Adra1b	-0.443408	5.00444	3.21351	0.0730328	0.741823
5830417I10Rik	-0.211607	5.0334	3.20856	0.0732539	0.741897
Cnppd1	-0.159163	5.44544	3.20946	0.0732139	0.741897
Dnajc2	-0.16969	6.10337	3.21072	0.0731573	0.741897
Pxdn	0.250429	4.82116	3.21182	0.0731081	0.741897
Araf	0.416478	8.54654	3.20104	0.0735917	0.742533
Cdc42	0.132157	9.19529	3.20221	0.0735388	0.742533
Gna15	-0.816183	0.202249	3.20201	0.0735477	0.742533
Mkrn2	0.316784	3.49797	3.20001	0.0736378	0.742533
Saa3	0.188788	6.72445	3.20242	0.0735294	0.742533
Smarca1	-0.146576	6.28619	3.20386	0.0734647	0.742533
Bloc1s3	0.480856	3.38752	3.19819	0.07372	0.742588
Kif18a	0.599446	0.84281	3.19633	0.0738039	0.742588
Pex10	0.29653	2.8319	3.19694	0.0737762	0.742588
Ncmap	-1.01098	0.0286241	3.19252	0.0739757	0.742831
Pla2g3	-0.940516	0.253863	3.19224	0.0739887	0.742831
Sf3a1	-0.161703	5.9856	3.19435	0.073893	0.742831
Ric8b	-0.185097	5.54996	3.1907	0.0740583	0.742993
Prkar2a	-0.182233	6.24831	3.1881	0.0741762	0.743101
Rasgef1b	-0.55801	3.40165	3.1886	0.0741535	0.743101
1500011B03Rik	-0.190501	7.94339	3.14368	0.0762215	0.743465
Abca1	0.321594	4.65798	3.16804	0.0750923	0.743465
Acadsb	-0.207447	5.40895	3.17769	0.0746501	0.743465
Ap3b2	-0.156167	7.46654	3.16548	0.0752102	0.743465
Btd	0.396	2.83992	3.17471	0.0747866	0.743465
Cbx8	0.404429	2.82461	3.17297	0.074866	0.743465
Cct5	0.149117	6.36109	3.1581	0.0755512	0.743465
Cplx2	0.167629	8.65826	3.14355	0.0762278	0.743465
Eda	-0.306872	2.90625	3.15251	0.0758102	0.743465
Fbxo4	0.236887	3.75833	3.15712	0.0755966	0.743465
Gm16701	0.599476	1.29951	3.15293	0.0757906	0.743465
Hk3	0.69351	0.73773	3.15812	0.0755499	0.743465
Il16	0.370353	3.97802	3.1459	0.0761181	0.743465
Map2k1	0.243428	8.49893	3.18451	0.0743392	0.743465
Nexn	-0.613124	3.42523	3.17338	0.0748475	0.743465
Nt5c3	-0.3252	6.6338	3.15261	0.0758058	0.743465
Nyap2	-0.475558	2.36673	3.16141	0.0753979	0.743465
Ormdl1	0.306681	3.32652	3.18578	0.0742816	0.743465
Phf23	-0.186944	5.77451	3.16251	0.0753471	0.743465
Phf7	0.449725	1.65693	3.14513	0.0761539	0.743465
Pou6f2	-0.578084	1.29952	3.15264	0.0758042	0.743465
Prr13	-0.186129	5.72733	3.16138	0.0753995	0.743465
Rab2a	0.121714	9.034	3.14916	0.0759659	0.743465
Rab9	0.206623	5.2133	3.14402	0.0762058	0.743465
Rara	0.331329	2.67907	3.1431	0.0762487	0.743465
Rnf144b	-0.34344	4.42552	3.14374	0.0762188	0.743465
Rnf167	-0.198897	5.46406	3.14453	0.0761818	0.743465
Rpl14	0.157874	6.79403	3.17079	0.074966	0.743465
Rps3a1	0.259964	5.22512	3.17419	0.0748102	0.743465
Sars2	-0.520635	1.39708	3.18328	0.0743953	0.743465
Sbno1	-0.141165	7.93252	3.14788	0.0760258	0.743465
Scarb2	-0.174065	5.08482	3.16555	0.0752073	0.743465
Slc18a2	0.72663	1.36118	3.14422	0.0761967	0.743465
Sstr1	-0.235893	4.73693	3.151	0.0758805	0.743465
Uchl3	0.26296	4.55449	3.14325	0.0762417	0.743465
Usp33	0.226342	5.80736	3.14429	0.0761933	0.743465
Vezf1	-0.162509	6.17278	3.15864	0.0755261	0.743465
Zbtb46	-0.386265	2.01762	3.16024	0.0754521	0.743465
Capn2	-0.18506	5.02086	3.14103	0.0763458	0.743669
Dnajc12	0.299909	4.16671	3.13746	0.0765127	0.743669
Dnmt1	-0.245531	5.83912	3.13627	0.0765688	0.743669
Fancm	-0.387095	2.6664	3.13465	0.0766448	0.743669
Myg1	-0.283808	3.54615	3.13605	0.0765793	0.743669
Rprml	0.176435	7.97015	3.13496	0.0766302	0.743669
Wbscr17	0.238822	7.90302	3.13608	0.0765776	0.743669
Ddx20	0.358555	2.89284	3.13086	0.0768234	0.74436
Nab1	-0.165045	6.47805	3.13133	0.0768012	0.74436
Ppp1r14c	0.364631	2.63856	3.12937	0.0768935	0.74452
Ddit4l	-0.374962	4.69811	3.12578	0.0770631	0.745294
Nt5c2	0.182967	5.29763	3.1254	0.0770808	0.745294
Chmp6	-0.275305	3.51359	3.12383	0.0771551	0.745493
Mpped2	0.15055	6.81454	3.11837	0.0774143	0.745977
Pcnx	0.241813	6.96748	3.12054	0.077311	0.745977
Rnu11	1.13759	0.348065	3.12047	0.0773144	0.745977
Rpusd1	-0.201322	4.26047	3.11824	0.0774203	0.745977
2300009A05Rik	0.185739	5.46403	3.1153	0.0775603	0.746289
Frmpd3	-0.303337	3.87037	3.11569	0.0775417	0.746289
5930403L14Rik	0.199089	5.844	3.09997	0.0782937	0.746324
Adap1	-0.19151	6.14251	3.08724	0.0789086	0.746324
Arap2	-0.187087	7.37777	3.08778	0.0788824	0.746324
Astn1	0.195656	5.90669	3.09432	0.0785659	0.746324
Dnajb11	0.210552	5.10793	3.09399	0.0785821	0.746324
Elk1	0.133179	7.01189	3.09059	0.0787461	0.746324
Fgf13	0.197924	7.33694	3.10881	0.0778697	0.746324
Gm11696	-0.539709	1.20375	3.10846	0.0778865	0.746324
Gsk3b	-0.12807	8.58745	3.08921	0.0788131	0.746324
Kcns1	-0.332935	3.99996	3.10383	0.0781082	0.746324
Lmo7	0.189601	7.26016	3.10758	0.0779288	0.746324
Lrp5	0.447105	2.44048	3.10424	0.0780885	0.746324
Malat1	-0.260788	11.5464	3.10632	0.0779888	0.746324
Mbnl1	-0.142982	6.36925	3.09118	0.0787178	0.746324
Pcdh18	-0.431583	2.32418	3.10287	0.0781546	0.746324
Raf1	0.192217	5.38227	3.10069	0.0782591	0.746324
Sh3bp5l	-0.221572	5.5282	3.0904	0.0787556	0.746324
Sys1	0.207776	5.13836	3.11133	0.0777497	0.746324
Tacc2	0.143354	6.80755	3.09004	0.0787729	0.746324
Tcp11l1	0.597497	1.06525	3.09138	0.0787081	0.746324
Tmem2	0.182077	5.59355	3.09092	0.0787302	0.746324
Tsr1	0.198277	5.49278	3.08998	0.0787759	0.746324
Tst	-0.309135	4.60814	3.0934	0.0786102	0.746324
Zc3h10	-0.345078	3.40246	3.10753	0.0779312	0.746324
Zfp41	0.384561	2.89527	3.10636	0.0779871	0.746324
Arf2	-0.180682	5.24544	3.07831	0.079343	0.746347
Athl1	0.55192	1.51708	3.07845	0.0793362	0.746347
Brinp1	0.138201	8.57414	3.08172	0.0791767	0.746347
Cdk5rap1	0.376866	3.3134	3.07546	0.0794823	0.746347
Ctsf	-0.16733	5.12978	3.08318	0.0791059	0.746347
Foxred1	0.236771	4.44972	3.08593	0.0789722	0.746347
Gatsl3	-0.708038	0.485499	3.07504	0.0795027	0.746347
Neurog2	0.871488	0.426566	3.07707	0.0794033	0.746347
Ramp3	-0.592784	4.99909	3.07854	0.0793316	0.746347
Tex30	0.255032	3.92577	3.08175	0.0791752	0.746347
Tmem87a	-0.152085	5.8872	3.08043	0.0792395	0.746347
Adgrl4	-0.252394	4.62828	3.07288	0.0796082	0.746816
C230004F18Rik	0.403038	2.03608	3.06939	0.0797792	0.746816
Ppm1h	0.321344	6.26703	3.0706	0.0797199	0.746816
Sema5a	0.285437	7.30204	3.06758	0.0798682	0.746816
Sin3a	-0.289673	3.95657	3.0711	0.0796957	0.746816
Tex15	-0.71311	0.523463	3.06743	0.0798757	0.746816
Cited4	-0.848341	0.965434	3.06307	0.0800903	0.748318
Nudt21	0.326761	2.54473	3.06168	0.0801588	0.748455
Rtkn	-0.275466	4.03644	3.05861	0.0803104	0.748797
Tada2b	0.268902	5.08061	3.05932	0.0802753	0.748797
Zfp677	-0.856898	0.241092	3.05766	0.0803573	0.748797
Mgat2	0.171489	5.35994	3.05355	0.0805608	0.750188
2810002D19Rik	0.370745	2.36189	3.05124	0.0806755	0.750753
N4bp1	-0.157156	5.33544	3.04564	0.0809543	0.751734
Pstk	0.292317	2.95973	3.04738	0.0808676	0.751734
Slc43a2	-0.218717	5.58545	3.04477	0.0809977	0.751734
Upf1	-0.247224	3.75676	3.04596	0.0809381	0.751734
C130036L24Rik	-0.337443	2.773	3.03299	0.0815874	0.752176
Cmtm6	0.20003	5.38212	3.04218	0.0811267	0.752176
E030024N20Rik	0.247234	4.56444	3.04005	0.0812333	0.752176
Elp4	0.314562	3.38396	3.03783	0.0813447	0.752176
Evi5	-0.166347	6.07753	3.03351	0.0815614	0.752176
Ftx	-0.178778	5.41783	3.04012	0.08123	0.752176
Kcnj10	-0.197204	5.81745	3.03368	0.0815531	0.752176
Slc35a3	0.365942	2.35465	3.03637	0.081418	0.752176
Smim15	0.2099	6.36949	3.03463	0.0815051	0.752176
Tsc22d3	-0.292219	6.5175	3.0394	0.0812659	0.752176
3110021N24Rik	-0.908919	0.0106342	3.02876	0.0818003	0.752325
Fkbp5	0.321679	5.79457	3.02899	0.0817889	0.752325
Ggcx	-0.253825	3.23222	3.02681	0.0818987	0.752325
Inppl1	-0.185096	5.87348	3.02797	0.0818405	0.752325
Nid2	0.54132	1.60169	3.02673	0.0819031	0.752325
Panct2	-0.578496	1.24861	3.02622	0.0819288	0.752325
Cdk5rap3	0.282283	3.08889	3.01823	0.0823334	0.752812
Fam19a4	-0.913506	2.33009	3.01515	0.0824897	0.752812
Fezf2	0.22245	4.76548	3.02238	0.0821228	0.752812
Golm1	0.332219	4.23227	3.01556	0.0824687	0.752812
Keap1	-0.188271	6.1027	3.01391	0.0825531	0.752812
Klhl18	-0.325003	3.21806	3.01928	0.08228	0.752812
Prodh	-0.421546	2.23099	3.01974	0.0822566	0.752812
Rab3gap1	-0.141247	7.49141	3.02179	0.0821529	0.752812
Stxbp5	0.143402	6.38023	3.0134	0.0825787	0.752812
Tmem252	0.727939	0.575133	3.0141	0.082543	0.752812
Wibg	0.52289	1.94362	3.01644	0.082424	0.752812
Cables2	0.21096	5.23933	3.01112	0.082695	0.752883
Micu3	-0.145523	8.35327	3.01196	0.0826524	0.752883
Mas1	0.246919	4.96959	3.00988	0.0827583	0.752965
Ccl17	-0.910182	0.0865086	3.00852	0.0828277	0.753103
Abi3	0.325787	2.47278	2.99261	0.0836454	0.753897
C230037L18Rik	-0.565902	1.31015	2.99768	0.0833836	0.753897
Cdkl5	-0.377936	2.42363	3.00555	0.0829798	0.753897
Frrs1	0.505859	2.01225	2.98468	0.0840561	0.753897
Gigyf2	-0.195534	4.90628	2.98619	0.0839777	0.753897
Ifit3	-0.312749	3.72702	2.99657	0.0834408	0.753897
Lin7b	-0.267882	5.5	2.99245	0.0836538	0.753897
Mex3b	0.287651	4.32565	2.99989	0.0832704	0.753897
Nek4	0.240867	4.09527	2.98486	0.0840464	0.753897
Npas1	0.473192	1.31382	2.98534	0.0840215	0.753897
Nr2c1	-0.427235	2.76563	2.99169	0.0836926	0.753897
Ppp4c	0.679941	0.924447	2.9955	0.0834963	0.753897
Prdx4	0.303608	2.81024	3.00402	0.0830584	0.753897
Rb1	0.259957	4.64956	3.00036	0.083246	0.753897
Rhobtb2	-0.249776	5.10882	2.99835	0.0833494	0.753897
Scd1	-0.157406	6.11468	2.9995	0.0832904	0.753897
Sec23a	0.187341	6.68312	2.98743	0.0839131	0.753897
Sfrp1	0.403864	2.85755	2.9919	0.0836822	0.753897
Slc31a1	0.292364	5.08073	2.99073	0.0837425	0.753897
Tmem260	-0.406014	2.41008	2.99919	0.0833062	0.753897
Ube2e2	0.209863	6.58481	2.98992	0.0837844	0.753897
Grn	0.176656	6.00829	2.9835	0.0841173	0.753959
Hook3	-0.146497	6.32542	2.98219	0.0841852	0.75408
L2hgdh	0.336628	4.10097	2.97889	0.0843569	0.754089
Mapkbp1	-0.184046	5.87693	2.97696	0.0844579	0.754089
Notch4	0.460669	2.01528	2.97705	0.0844531	0.754089
Ppp2r5b	-0.182763	6.78391	2.97714	0.0844486	0.754089
Snx19	0.179139	5.13857	2.98082	0.0842567	0.754089
Six3	-0.910673	2.98544	2.97548	0.0845348	0.75429
4930429B21Rik	0.57936	0.909105	2.96558	0.0850539	0.755405
6030419C18Rik	0.234782	6.78431	2.96121	0.0852841	0.755405
A630072M18Rik	-0.359839	2.89291	2.95597	0.0855609	0.755405
Bpnt1	0.288072	6.21883	2.96999	0.0848225	0.755405
Ddr2	-0.384289	3.97502	2.96567	0.0850494	0.755405
Fbf1	0.236056	3.65424	2.95772	0.0854683	0.755405
Ifi27	0.242069	6.08163	2.96166	0.0852605	0.755405
Plekha2	0.332364	5.41192	2.95643	0.0855367	0.755405
Rab13	-0.302363	2.81411	2.95551	0.0855854	0.755405
Rbm26	-0.181946	5.64403	2.96198	0.0852436	0.755405
Slc43a3	1.04893	0.275559	2.96073	0.0853093	0.755405
Slc48a1	-0.144233	8.14895	2.96406	0.0851337	0.755405
Sox18	1.07099	0.0702842	2.95669	0.0855228	0.755405
Srp19	0.147988	6.56923	2.95679	0.0855173	0.755405
Steap1	1.18069	3.18493	2.95792	0.0854577	0.755405
Vps13a	-0.19402	4.61655	2.96086	0.0853026	0.755405
Zfp111	-0.295885	3.30512	2.97075	0.0847828	0.755405
5830416P10Rik	-0.668647	0.456195	2.93851	0.0864905	0.755453
Brms1	0.6513	1.27112	2.93998	0.0864117	0.755453
Gse1	0.197401	6.26717	2.93715	0.0865635	0.755453
Hsp90b1	0.214159	8.31381	2.93701	0.0865708	0.755453
Kif3a	-0.120737	8.11033	2.93943	0.086441	0.755453
Lmtk2	0.565661	4.40095	2.94045	0.0863868	0.755453
Lrp11	0.216117	6.7722	2.93952	0.0864362	0.755453
Lrrc16a	0.303367	4.23335	2.94094	0.0863605	0.755453
Narf	-0.305909	3.22796	2.94408	0.0861926	0.755453
Notch2	0.272451	4.55703	2.93882	0.0864736	0.755453
Rasgrp2	-0.326526	4.99333	2.94066	0.0863756	0.755453
Resp18	-0.296388	5.05725	2.94677	0.0860492	0.755453
Smyd2	-0.193998	5.73076	2.94109	0.0863526	0.755453
Tacc1	-0.160025	7.4333	2.94976	0.0858904	0.755453
Tmem231	0.231561	4.46045	2.9399	0.086416	0.755453
Wac	0.169906	6.24696	2.94643	0.0860677	0.755453
Zfp595	0.437367	1.54427	2.95117	0.0858152	0.755453
Zfp691	0.605184	1.71406	2.94634	0.0860724	0.755453
D2Wsu81e	-0.170766	5.341	2.9352	0.0866681	0.755621
Sptssa	0.351029	4.60386	2.93462	0.086699	0.755621
Ggact	-0.293044	3.48822	2.93139	0.0868726	0.756058
Lin7c	0.145202	7.30805	2.92964	0.0869671	0.756058
Nckap1	0.191169	7.82039	2.93203	0.086838	0.756058
Plekhg5	0.213355	6.76397	2.93029	0.0869317	0.756058
Gpc6	0.456867	1.99526	2.92676	0.0871223	0.756933
1600029O15Rik	0.433291	2.01887	2.92183	0.0873887	0.757824
Dlgap4	-0.184356	7.99312	2.92194	0.0873828	0.757824
Dnajc14	0.22782	4.16901	2.92214	0.0873719	0.757824
Nup107	0.288011	5.09458	2.92031	0.0874713	0.758066
1700007K13Rik	0.570695	0.827013	2.91894	0.0875454	0.758109
Pisd-ps3	0.400964	6.99945	2.91719	0.0876402	0.758109
Ptprj	0.295923	4.5791	2.91775	0.0876097	0.758109
Riiad1	0.561331	1.2867	2.91556	0.087729	0.758143
Zfp653	0.385881	2.26575	2.91511	0.0877533	0.758143
Akr7a5	-0.255569	4.25432	2.90717	0.0881867	0.758581
Coa5	0.209232	6.09551	2.90906	0.0880832	0.758581
Gria4	-0.235809	4.90243	2.90772	0.0881563	0.758581
Nudcd3	-0.13495	6.87164	2.91268	0.0878859	0.758581
Slc7a14	0.268277	7.63611	2.90722	0.0881839	0.758581
Smox	-0.176334	4.87485	2.91205	0.0879199	0.758581
Zf12	-0.634222	0.626557	2.91021	0.0880204	0.758581
Gbas	0.171099	6.55776	2.90528	0.0882898	0.758997
Zfp763	-0.20372	5.46063	2.90331	0.0883978	0.759455
Scg2	0.256503	8.73661	2.90087	0.0885317	0.759664
Snhg20	-0.162702	5.45176	2.90185	0.0884778	0.759664
Unc5d	-0.361445	5.07911	2.89963	0.0886002	0.759782
4930503L19Rik	0.481491	2.14918	2.8919	0.0890258	0.760192
Gatad2a	-0.153664	5.36557	2.89559	0.0888225	0.760192
Mrps35	0.182104	4.3115	2.8941	0.0889043	0.760192
Rnf208	-0.159902	6.33359	2.89337	0.088945	0.760192
Sepw1	0.246282	6.83038	2.88883	0.0891959	0.760192
Smoc2	0.335085	5.55559	2.89363	0.0889305	0.760192
Tmem120b	0.415519	1.87261	2.89145	0.0890506	0.760192
Ttll1	-0.347089	2.66152	2.88899	0.0891866	0.760192
Zbtb7c	-0.67728	0.65219	2.89165	0.0890394	0.760192
Zfp213	-0.633821	0.754493	2.89037	0.0891105	0.760192
Mrpl45	-0.207367	4.29761	2.88314	0.0895116	0.762414
Ptms	0.142214	7.27078	2.882	0.0895748	0.762485
Zfp710	0.275277	3.30381	2.8809	0.0896357	0.762536
Prpf39	0.156982	5.94131	2.8785	0.0897698	0.762741
Usp29	-0.245383	5.82308	2.87901	0.0897413	0.762741
Colgalt2	0.309405	3.36846	2.86843	0.0903332	0.76285
Foxp2	-0.654908	3.5818	2.8748	0.089976	0.76285
Itih3	-0.313183	3.96625	2.87173	0.0901479	0.76285
Jph2	-0.835737	0.167165	2.87373	0.0900362	0.76285
Lmo1	0.277634	4.64863	2.87372	0.0900367	0.76285
Nfatc4	-0.657322	1.0995	2.86851	0.0903282	0.76285
Nnt	0.252215	4.31376	2.86747	0.0903867	0.76285
Tbca	0.118788	7.32418	2.87341	0.090054	0.76285
Tdp1	-0.251376	4.1911	2.86746	0.0903875	0.76285
Zfand5	0.126825	8.29239	2.86948	0.0902739	0.76285
Zfp810	0.363468	2.79226	2.86865	0.0903208	0.76285
Camsap3	-0.217433	3.88605	2.86274	0.0906529	0.763264
Cbfa2t3	-0.186091	5.76631	2.8608	0.0907625	0.763264
Fxyd7	-0.360665	4.24222	2.8614	0.0907283	0.763264
Herc2	-0.124789	7.83494	2.85878	0.0908766	0.763264
Kit	0.278402	5.69119	2.85885	0.0908722	0.763264
Rab1	0.136167	8.57375	2.8596	0.09083	0.763264
Rerg	0.528199	3.69668	2.86266	0.0906575	0.763264
Wasf1	0.165639	9.03436	2.86217	0.0906849	0.763264
Agpat1	-0.149175	7.55822	2.85506	0.0910868	0.763643
Napb	-0.144704	8.68486	2.85602	0.0910326	0.763643
Spryd4	-0.303098	2.84927	2.85532	0.0910718	0.763643
Ep300	-0.143908	6.56702	2.85367	0.0911654	0.76384
Bcar1	0.232008	4.67795	2.84956	0.0913988	0.765334
Arsb	0.244215	5.80092	2.84617	0.0915919	0.766488
Bloc1s4	0.166699	6.00075	2.84404	0.0917136	0.766495
Casp12	-0.585741	0.934196	2.83361	0.0923109	0.766495
Cercam	-0.415311	1.55757	2.83665	0.0921363	0.766495
Cpsf3l	-0.276274	3.29315	2.84146	0.0918608	0.766495
Csmd1	0.233321	4.32143	2.84095	0.0918896	0.766495
Csnk1e	-0.160441	6.02226	2.83414	0.0922804	0.766495
Dhodh	-0.225028	4.34542	2.83454	0.0922575	0.766495
Epb4.1l4b	0.684514	1.01237	2.8407	0.0919041	0.766495
Herpud1	-0.170791	6.93435	2.84127	0.0918715	0.766495
Il34	-0.194088	5.8296	2.83555	0.0921991	0.766495
Prr15	-0.530741	0.886833	2.83742	0.0920919	0.766495
Rpl11	0.124171	7.2303	2.83827	0.0920433	0.766495
Ticam1	-0.377992	2.30234	2.83694	0.0921196	0.766495
Atp11b	-0.197847	5.4869	2.83	0.0925184	0.767488
Sept4	-0.170663	6.62125	2.82961	0.0925411	0.767488
Rabep1	-0.148894	6.35286	2.828	0.0926338	0.767798
Ankrd24	-0.217113	5.20505	2.82681	0.0927024	0.767908
Cbr3	-0.316637	3.39459	2.82556	0.0927743	0.768045
Fam229b	-0.225666	4.20388	2.82451	0.092835	0.768089
Rsad1	-0.359011	3.87941	2.82107	0.0930341	0.76882
Tnfrsf19	0.192981	5.38055	2.82138	0.0930161	0.76882
Bax	-0.259297	3.37989	2.81341	0.0934797	0.768838
Dnaaf2	-0.351966	2.8137	2.81748	0.0932429	0.768838
Naip5	0.713238	0.380451	2.81536	0.0933657	0.768838
Rnf130	-0.149142	6.763	2.81393	0.0934493	0.768838
Slc4a7	0.207497	6.48337	2.81399	0.0934457	0.768838
Spry4	0.665481	0.839897	2.81605	0.0933257	0.768838
Tbrg3	-0.517761	1.90667	2.81988	0.0931035	0.768838
Wdr11	0.361031	4.40667	2.81567	0.0933481	0.768838
9430021M05Rik	-0.56312	2.35842	2.76959	0.096071	0.769366
A330076C08Rik	-0.455233	1.18316	2.75839	0.0967457	0.769366
Adrbk1	-0.189628	7.11491	2.74727	0.0974207	0.769366
Agbl4	-0.943045	0.496955	2.75046	0.0972262	0.769366
Agk	0.259009	3.61292	2.76557	0.0963125	0.769366
Asap1	-0.254171	6.38265	2.76198	0.0965289	0.769366
Atp2b4	-0.474018	7.74163	2.79066	0.0948149	0.769366
Brca1	0.554205	0.952051	2.76944	0.09608	0.769366
C2cd3	-0.221492	4.87645	2.76834	0.0961457	0.769366
C2cd4b	0.394184	2.16425	2.80439	0.0940064	0.769366
Cckbr	-0.766482	3.4311	2.75855	0.0967357	0.769366
Cdkl3	0.413974	2.49733	2.79388	0.0946247	0.769366
Clns1a	0.14348	5.77624	2.75599	0.0968908	0.769366
Cntrob	0.422356	3.4321	2.74182	0.0977535	0.769366
Col1a1	-0.511333	3.1813	2.77074	0.0960018	0.769366
Col26a1	-0.654885	1.72703	2.79976	0.0942784	0.769366
Col9a2	-0.503528	2.90009	2.7442	0.0976077	0.769366
Coq6	-0.416301	2.41601	2.7706	0.09601	0.769366
Crybb1	-0.706086	0.817556	2.79677	0.0944545	0.769366
Cth	-0.253786	3.20374	2.76589	0.0962932	0.769366
Cxx1b	-0.151267	6.46912	2.76893	0.0961105	0.769366
Doc2a	-0.521487	3.41508	2.74084	0.0978134	0.769366
Emg1	0.181553	4.79745	2.7529	0.0970784	0.769366
Emx2os	0.428708	1.68371	2.77075	0.096001	0.769366
Esyt3	-0.837061	0.238258	2.78274	0.0952851	0.769366
Fam84b	0.353049	4.66424	2.75273	0.0970883	0.769366
Fhit	-0.794642	0.0918682	2.79485	0.0945675	0.769366
Fnbp1l	-0.295514	5.95541	2.80648	0.0938844	0.769366
Gabra2	-0.231506	3.7584	2.7829	0.0952756	0.769366
Gdf15	0.719458	0.475145	2.76001	0.0966479	0.769366
Glp2r	-0.85642	1.46331	2.78846	0.0949454	0.769366
Gm15867	0.698791	0.256865	2.76925	0.0960913	0.769366
Gm16740	0.556315	0.723296	2.75786	0.0967775	0.769366
Gpx4	0.276923	3.95655	2.77834	0.0955469	0.769366
Hcfc2	0.312082	2.39726	2.75048	0.097225	0.769366
Hddc2	0.516151	2.05357	2.78902	0.0949123	0.769366
Hs3st3b1	-1.09924	0.465971	2.74683	0.0974475	0.769366
Inpp5e	0.269358	3.29255	2.74539	0.0975352	0.769366
Kctd6	0.284082	4.98347	2.74626	0.0974819	0.769366
Kif21a	-0.125124	7.93196	2.79749	0.0944122	0.769366
Klk10	0.942398	0.550461	2.7613	0.0965697	0.769366
Lrrc10b	0.382857	5.44922	2.7925	0.0947062	0.769366
Macrod2	-0.171675	4.90719	2.79124	0.0947808	0.769366
Marveld1	-0.26111	3.67449	2.78027	0.0954323	0.769366
Med13l	-0.161513	6.95277	2.80358	0.094054	0.769366
Mmaa	0.262074	3.28735	2.7576	0.0967932	0.769366
Mycbp2	0.157337	8.5916	2.7442	0.0976076	0.769366
Nudt13	0.196986	4.50524	2.80298	0.0940895	0.769366
Opn3	-0.558865	2.58767	2.76694	0.09623	0.769366
Plaa	0.184065	5.45056	2.81053	0.0936474	0.769366
Plekhb1	-0.179862	6.97438	2.80907	0.093733	0.769366
Ppp1r14a	-0.263533	3.02404	2.79542	0.0945342	0.769366
Prkaa2	-0.188887	5.72813	2.78448	0.0951813	0.769366
Sat1	0.400057	3.9942	2.77991	0.0954536	0.769366
Sdf2	0.159317	6.27901	2.8032	0.0940763	0.769366
Sepp1	-0.176198	7.69947	2.77769	0.0955859	0.769366
Serpina3n	0.366195	3.05684	2.77666	0.0956474	0.769366
Sgip1	0.142239	6.35429	2.7613	0.0965695	0.769366
Slc16a4	0.700608	0.930936	2.75777	0.096783	0.769366
Slc18b1	0.193603	3.94027	2.77724	0.0956129	0.769366
Sox1	-0.227897	4.72988	2.74532	0.0975398	0.769366
Spopl	-0.204964	4.16878	2.80103	0.0942036	0.769366
Srsf5	0.137227	9.81135	2.74847	0.0973473	0.769366
Stim2	0.301235	6.95198	2.77885	0.095517	0.769366
Tecr	-0.141165	7.55941	2.8059	0.0939182	0.769366
Thumpd2	0.560198	1.13773	2.79795	0.0943852	0.769366
Tmem234	-0.172562	4.93832	2.79358	0.0946428	0.769366
Tmem35	-0.216281	8.7192	2.76189	0.0965344	0.769366
Trmt1	-0.198245	4.44272	2.74147	0.0977748	0.769366
Trpc4	0.231489	5.1803	2.7411	0.0977977	0.769366
Ubap1	-0.162832	5.63516	2.78477	0.0951642	0.769366
Usp12	-0.173524	4.58162	2.74179	0.0977553	0.769366
Uxs1	-0.882836	0.109298	2.76767	0.0961864	0.769366
Xpo5	0.464545	1.8207	2.80313	0.0940805	0.769366
Yod1	0.332007	5.01348	2.75336	0.0970504	0.769366
Zbtb48	-0.528682	1.31896	2.74865	0.0973363	0.769366
Zfp53	0.54792	1.09916	2.75086	0.0972024	0.769366
Ercc3	0.175588	4.89714	2.73624	0.0980952	0.770708
Ythdc2	0.149655	6.33107	2.7371	0.0980424	0.770708
Eef1b2	0.122441	8.50653	2.73346	0.0982665	0.771292
Htr1a	-0.229336	3.91841	2.73142	0.0983919	0.771292
Nrm	-0.52724	1.61511	2.73156	0.0983832	0.771292
Tmtc3	0.270312	3.16291	2.73244	0.0983292	0.771292
Myo6	-0.138498	7.9161	2.72796	0.0986051	0.772527
Cdk16	-0.147422	7.07806	2.72535	0.0987662	0.773353
6330415B21Rik	-0.164953	5.73805	2.69362	0.100751	0.773534
6330415G19Rik	-0.538806	1.25062	2.59734	0.107043	0.773534
AI182371	-0.851352	0.238774	2.59766	0.107021	0.773534
Abcg2	-0.229293	3.78967	2.67022	0.102242	0.773534
Abi2	0.129417	8.70818	2.67588	0.101879	0.773534
Aco1	0.268364	3.70998	2.61629	0.105771	0.773534
Akirin2	0.200556	7.4541	2.6982	0.100461	0.773534
Akt1	-0.167339	6.31878	2.644	0.103942	0.773534
Alpl	0.4006	2.2767	2.63779	0.104349	0.773534
Amdhd2	0.325696	3.33806	2.67208	0.102123	0.773534
Ankrd50	-0.170097	5.22644	2.60474	0.106545	0.773534
Apopt1	0.222587	3.97529	2.61202	0.106057	0.773534
Arl15	0.299501	5.58945	2.64139	0.104112	0.773534
Arntl	0.268367	5.26899	2.70493	0.100038	0.773534
Atg5	-0.172214	4.56865	2.66375	0.102659	0.773534
Atp1a3	-0.166841	7.82106	2.66007	0.102896	0.773534
BC048403	0.338499	2.45037	2.64266	0.104029	0.773534
BC052040	-0.226283	4.11176	2.60939	0.106233	0.773534
Bcl2a1b	0.361645	2.10912	2.67697	0.101809	0.773534
Bcl2l1	-0.155873	6.94819	2.67916	0.10167	0.773534
Bmpr2	0.118777	8.28154	2.60348	0.106629	0.773534
Brd4	-0.18253	6.14562	2.65685	0.103105	0.773534
C1rl	0.66726	0.255938	2.62542	0.105165	0.773534
C2cd4a	0.995371	0.284788	2.61372	0.105943	0.773534
Cacna1e	-0.284624	4.56142	2.61835	0.105634	0.773534
Calb2	-0.294933	4.78089	2.70836	0.0998234	0.773534
Car12	0.376963	5.19875	2.65959	0.102927	0.773534
Ccdc177	-0.163022	6.20622	2.63049	0.104829	0.773534
Cdh15	-0.696313	0.541951	2.59015	0.10753	0.773534
Cep120	-0.172497	5.72626	2.64955	0.103579	0.773534
Chd2	-0.132908	6.0671	2.62529	0.105173	0.773534
Colgalt1	-0.170048	5.38324	2.60908	0.106254	0.773534
Crispld2	-0.422752	2.66822	2.67191	0.102133	0.773534
Csnk1g3	0.196428	6.23267	2.67124	0.102176	0.773534
Cyp3a13	-0.638809	0.668193	2.62643	0.105098	0.773534
Cyp4x1os	0.630407	0.544145	2.68371	0.101379	0.773534
Ddah2	0.205017	5.40825	2.67428	0.101981	0.773534
Decr1	-0.209542	4.39207	2.67669	0.101827	0.773534
Dopey2	0.178844	5.33379	2.65765	0.103053	0.773534
Draxin	0.615419	0.421821	2.59332	0.107315	0.773534
Ecscr	0.734316	0.442416	2.68789	0.101113	0.773534
Edem1	0.231714	3.98987	2.64379	0.103956	0.773534
Edn3	-0.487618	1.79992	2.64132	0.104117	0.773534
Eif2s3x	0.191171	4.50442	2.63801	0.104334	0.773534
Elof1	-0.205689	6.45334	2.65408	0.103285	0.773534
Ets1	0.34116	2.94061	2.72062	0.0990594	0.773534
F13a1	-0.44122	1.98771	2.6133	0.105971	0.773534
Faim2	-0.165869	6.87297	2.69101	0.100916	0.773534
Fam171b	-0.155956	8.28941	2.59016	0.10753	0.773534
Fam198b	0.501016	1.47034	2.5919	0.107412	0.773534
Fap	0.613386	0.826123	2.65826	0.103013	0.773534
Fat4	0.420893	2.10922	2.67663	0.101831	0.773534
Fbxl21	0.77495	0.343829	2.63436	0.104574	0.773534
Foxm1	0.637833	0.952723	2.69991	0.100354	0.773534
Gabra5	0.241861	6.79731	2.62706	0.105056	0.773534
Gabrb3	0.16247	7.36737	2.71358	0.0994978	0.773534
Galnt1	-0.149562	5.53346	2.66499	0.102579	0.773534
Glra3	-0.87951	0.150353	2.62117	0.105447	0.773534
Glyr1	0.159245	7.55951	2.60292	0.106667	0.773534
Gm10767	0.320462	2.43399	2.71666	0.0993055	0.773534
Gm13889	0.172814	6.3499	2.66435	0.10262	0.773534
Gm9895	-0.816081	0.24096	2.70461	0.100059	0.773534
Golga4	-0.162868	5.58026	2.62467	0.105214	0.773534
Gpr17	-0.256197	4.86367	2.66194	0.102775	0.773534
Gpr45	0.182067	4.71335	2.63137	0.104771	0.773534
Gramd3	0.159873	5.62482	2.64003	0.104202	0.773534
Grhl1	0.160278	6.80559	2.68989	0.100987	0.773534
Gsn	0.192397	5.14241	2.64992	0.103555	0.773534
Hsf5	-0.800755	0.126207	2.72031	0.0990785	0.773534
Htr3a	0.418009	1.51938	2.70562	0.099995	0.773534
Ifi203	0.395861	2.48317	2.70518	0.100023	0.773534
Ift122	-0.187703	4.40468	2.58669	0.107765	0.773534
Igfbpl1	0.663483	2.61762	2.6587	0.102985	0.773534
Il13ra1	-0.466396	1.95868	2.67935	0.101657	0.773534
Jrkl	-0.216641	4.06461	2.63204	0.104727	0.773534
Kcna2	-0.137978	7.81737	2.60938	0.106233	0.773534
Kcna4	-0.268525	4.25688	2.62221	0.105377	0.773534
Kcnmb4os2	0.475354	1.84551	2.61322	0.105976	0.773534
Lamb2	-0.283034	3.67156	2.62397	0.105261	0.773534
Lamtor2	-0.21829	4.49973	2.62119	0.105445	0.773534
Lims2	-0.482547	1.12824	2.61157	0.106087	0.773534
Lsm8	0.185451	6.73467	2.62897	0.10493	0.773534
Luzp1	-0.144803	7.37649	2.64417	0.10393	0.773534
Mat2b	0.14198	7.44885	2.70775	0.0998615	0.773534
Mcoln1	-0.206195	4.09023	2.64302	0.104006	0.773534
Meaf6	-0.257221	4.71766	2.64884	0.103626	0.773534
Megf6	-0.495872	0.953281	2.71444	0.0994438	0.773534
Mpc1	-0.173469	4.7971	2.70758	0.0998723	0.773534
Mpi	0.186767	5.31419	2.67078	0.102206	0.773534
Msrb1	-0.245073	3.93989	2.61601	0.10579	0.773534
Mvd	0.267215	5.32778	2.66337	0.102683	0.773534
Nav2	0.176936	4.62456	2.6493	0.103596	0.773534
Nefm	-0.130225	7.24612	2.63224	0.104714	0.773534
Npas4	-0.576018	1.23111	2.69087	0.100925	0.773534
Nr4a3	0.21381	6.18477	2.67744	0.101779	0.773534
Nrxn3	-0.130418	8.13139	2.68655	0.101198	0.773534
Nudt11	0.136187	6.48299	2.63931	0.104249	0.773534
Pard3	-0.202445	5.89626	2.60501	0.106526	0.773534
Pex12	0.281015	3.274	2.68303	0.101423	0.773534
Phka2	0.275448	2.90084	2.59852	0.106963	0.773534
Plrg1	-0.130931	6.40478	2.62812	0.104986	0.773534
Pmm2	0.351484	2.36348	2.60756	0.106355	0.773534
Ppp1cb	0.182564	7.57791	2.64806	0.103676	0.773534
Pradc1	0.295455	3.1874	2.60323	0.106646	0.773534
Prkdc	0.240328	3.47133	2.66969	0.102276	0.773534
Prox1	0.377303	2.65037	2.64273	0.104025	0.773534
Prpf3	-0.272377	3.44783	2.62834	0.104971	0.773534
Psmb7	0.168578	6.83509	2.58819	0.107663	0.773534
Psmd7	-0.120493	7.02347	2.70358	0.100123	0.773534
Pwwp2b	0.342557	2.92692	2.59979	0.106878	0.773534
Raly	-0.25885	3.80982	2.58736	0.10772	0.773534
Rbm47	0.457881	3.3816	2.64425	0.103925	0.773534
Rere	-0.124878	8.4042	2.60972	0.106211	0.773534
Retsat	-0.386517	1.80449	2.59417	0.107258	0.773534
Ripk2	0.302366	2.74299	2.70655	0.099937	0.773534
Rnmtl1	0.277839	3.36325	2.6483	0.10366	0.773534
Rnpep	0.188128	4.77491	2.62779	0.105007	0.773534
S100a1	-0.13678	5.91289	2.71969	0.0991171	0.773534
Samd8	0.143743	7.5641	2.66881	0.102333	0.773534
Scaf4	-0.374163	2.90457	2.60518	0.106515	0.773534
Scml4	0.378328	2.42823	2.71784	0.0992319	0.773534
Scnn1g	0.835082	0.112283	2.67921	0.101666	0.773534
Sdccag8	-0.326173	3.16808	2.68605	0.10123	0.773534
Slc11a2	-0.143736	6.02466	2.67081	0.102204	0.773534
Slc9a3r2	-0.206579	3.84343	2.67118	0.10218	0.773534
Slirp	0.15768	6.14487	2.70026	0.100332	0.773534
Smad6	-0.442521	1.78849	2.6283	0.104974	0.773534
Snx1	-0.14415	7.94213	2.6558	0.103173	0.773534
Snx32	-0.189619	4.28744	2.62949	0.104896	0.773534
Snx33	-0.389655	1.92535	2.6172	0.105711	0.773534
Sostdc1	0.748206	4.65558	2.60545	0.106497	0.773534
Spg20	-0.155082	6.69104	2.67305	0.10206	0.773534
Spop	0.164188	6.88973	2.67616	0.101861	0.773534
Srp14	0.11282	7.91172	2.61246	0.106027	0.773534
Ssu72	0.16036	5.07767	2.68963	0.101003	0.773534
Stat5b	-0.214675	4.87018	2.61915	0.105581	0.773534
Sugt1	-0.145901	5.55475	2.64788	0.103688	0.773534
Syne2	0.215711	4.69296	2.58864	0.107633	0.773534
Synpr	0.168418	7.53264	2.59828	0.10698	0.773534
Syt13	0.124649	7.46138	2.65455	0.103254	0.773534
Sytl5	-0.801426	0.271337	2.59623	0.107118	0.773534
Taf7	-0.381201	2.01794	2.64117	0.104127	0.773534
Tanc1	0.266289	7.48717	2.59637	0.107109	0.773534
Tapt1	0.164747	5.90997	2.71521	0.099396	0.773534
Timm50	-0.44898	1.73047	2.70447	0.100067	0.773534
Tmem91	-0.325829	3.64576	2.59354	0.1073	0.773534
Tnrc6b	-0.149238	7.06213	2.58937	0.107583	0.773534
Tor1aip2	-0.138438	6.13362	2.71563	0.0993695	0.773534
Tpr	-0.129468	6.95387	2.64534	0.103854	0.773534
Traf1	-0.696332	0.288592	2.71425	0.0994556	0.773534
Ttc3	-0.122076	10.8964	2.59816	0.106988	0.773534
Ttc7b	0.147632	7.12295	2.72335	0.0988901	0.773534
Txnl4b	0.238769	3.21675	2.61219	0.106045	0.773534
Usp16	0.175657	5.27953	2.70765	0.0998679	0.773534
Vit	0.398052	2.68007	2.63493	0.104537	0.773534
Vrk3	-0.313435	3.40874	2.69316	0.10078	0.773534
Wdr55	0.318281	2.76996	2.63563	0.104491	0.773534
Xpnpep1	0.255587	3.53203	2.59254	0.107368	0.773534
Xrcc2	-0.295006	2.9713	2.58822	0.107661	0.773534
Zfp408	0.344608	2.74593	2.66149	0.102804	0.773534
Zxdb	-0.214131	4.30206	2.66145	0.102807	0.773534
Ildr2	-0.145998	6.34337	2.58443	0.107919	0.77377
Kpna3	-0.13922	6.42509	2.58375	0.107965	0.77377
Mfsd2a	-0.248023	6.17719	2.58433	0.107926	0.77377
Vwc2l	-0.571254	2.11241	2.58265	0.108041	0.773912
Fastkd1	0.392243	3.45708	2.58183	0.108097	0.773913
Arhgef10	-0.206538	5.66772	2.57739	0.108401	0.774045
B230209E15Rik	-0.170343	5.6135	2.56684	0.109126	0.774045
C330007P06Rik	0.209898	4.26067	2.56216	0.109449	0.774045
Ccnc	0.161951	5.78455	2.56543	0.109223	0.774045
Cdkal1	0.330206	2.68994	2.55887	0.109677	0.774045
Cdpf1	0.269724	2.81526	2.57183	0.108782	0.774045
Celf5	0.126491	7.58169	2.56441	0.109293	0.774045
Cox5b	0.117209	6.93431	2.56176	0.109477	0.774045
Crebl2	-0.526319	1.01608	2.56438	0.109295	0.774045
Ddx49	-0.223496	4.53013	2.5766	0.108454	0.774045
Epha7	0.298221	7.41029	2.57693	0.108432	0.774045
Fgf12	-0.211256	6.2417	2.57039	0.108881	0.774045
Gas2l1	-0.151532	5.52426	2.57006	0.108903	0.774045
Grip2	-0.317818	3.67415	2.57309	0.108695	0.774045
Hnrnpa0	0.146586	8.2841	2.56044	0.109568	0.774045
Itpkc	0.391807	2.9413	2.56824	0.109029	0.774045
Lypd6b	-0.29991	3.36278	2.57071	0.108859	0.774045
Mustn1	-0.664458	0.622493	2.56106	0.109525	0.774045
Nfat5	0.163665	6.58237	2.57969	0.108243	0.774045
Peli1	0.134436	7.61512	2.5725	0.108736	0.774045
Phka1	-0.185274	5.201	2.56351	0.109356	0.774045
Sec24d	0.180288	5.82655	2.55924	0.109651	0.774045
Slc9a1	-0.22483	4.07003	2.56062	0.109556	0.774045
Sstr3	0.195053	4.94708	2.57689	0.108435	0.774045
Tmem97	-0.276431	3.1399	2.56569	0.109205	0.774045
Vps18	0.238159	4.7726	2.56254	0.109423	0.774045
Wnt4	-0.289233	3.97175	2.56132	0.109507	0.774045
Zdhhc13	0.229519	4.27528	2.57817	0.108347	0.774045
Ascl4	-0.846497	0.0691214	2.55042	0.110265	0.774255
Asic1	-0.380903	4.14637	2.55076	0.110241	0.774255
Cldn22	0.404275	2.16993	2.55266	0.110109	0.774255
Gpr37l1	-0.161566	7.66338	2.55411	0.110008	0.774255
Inafm2	0.256887	5.78999	2.5505	0.110259	0.774255
Malsu1	0.240162	4.01845	2.55222	0.110139	0.774255
Narfl	0.206257	3.96553	2.55552	0.10991	0.774255
Smg5	-0.216413	3.58752	2.55553	0.109909	0.774255
Tpst1	0.176116	5.59361	2.55244	0.110124	0.774255
Trmt112	-0.215804	3.42005	2.55507	0.109941	0.774255
Arhgap28	0.723316	0.529565	2.54574	0.110592	0.775465
Pepd	-0.21733	4.02961	2.54236	0.110829	0.775465
Prkacb	-0.1859	8.13366	2.5424	0.110826	0.775465
Prr5l	-0.191846	4.80636	2.54449	0.110679	0.775465
S100a11	0.578275	1.50152	2.54288	0.110793	0.775465
Scrib	-0.254334	3.57006	2.54334	0.11076	0.775465
Srgap1	-0.239529	5.28825	2.54255	0.110816	0.775465
Psmb2	0.272907	3.36816	2.54142	0.110895	0.77554
Flywch2	0.330088	2.59231	2.54006	0.110991	0.775817
Gm10865	-0.798533	0.202203	2.53543	0.111317	0.777227
Rnf4	0.156414	6.10334	2.53524	0.11133	0.777227
Scn2b	-0.129763	8.52715	2.53481	0.11136	0.777227
Sorl1	0.133036	8.64366	2.5283	0.111821	0.780048
D630045J12Rik	-0.145452	6.13942	2.52601	0.111983	0.780392
Tinf2	0.292454	2.94438	2.52647	0.111951	0.780392
Ccdc66	-0.303466	3.90388	2.52471	0.112076	0.780646
Atp5j	0.222135	7.40954	2.52128	0.112319	0.780776
Hdac1	-0.154936	5.30308	2.52186	0.112278	0.780776
Krr1	0.217612	5.02117	2.5214	0.112311	0.780776
Slc7a4	0.152984	5.78967	2.52232	0.112245	0.780776
Pid1	-0.141397	6.43485	2.52018	0.112397	0.780929
E430025E21Rik	-0.20389	4.26326	2.51865	0.112507	0.7813
Capn7	0.161574	6.44592	2.5175	0.112589	0.781398
[truncated: 11,876 more rows]

## Sheet: Metascape_Genotype vs WT
GroupID	Category	Term	Description	LogP	Log(q-value)	Genes	Symbols	InTerm_InList
1_Summary	GO Biological Processes	GO:0060135	maternal process involved in female pregnancy	-3.5034	0	12550,19014,67971,18429,18053,270893,77574	Cdh1,Med1,Tppp3,Oxt,Ngfr,Tmem132e,Tcaf1	7/-
1_Member	GO Biological Processes	GO:0060135	maternal process involved in female pregnancy	-3.5034	0	12550,19014,67971	Cdh1,Med1,Tppp3	3/70
1_Member	GO Biological Processes	GO:0007565	female pregnancy	-3.11816	0	12550,18429,19014,67971	Cdh1,Oxt,Med1,Tppp3	4/219
1_Member	GO Biological Processes	GO:0044703	multi-organism reproductive process	-2.9178	0	12550,18429,19014,67971	Cdh1,Oxt,Med1,Tppp3	4/248
1_Member	GO Biological Processes	GO:0044706	multi-multicellular organism process	-2.88586	0	12550,18429,19014,67971	Cdh1,Oxt,Med1,Tppp3	4/253
1_Member	GO Biological Processes	GO:0050680	negative regulation of epithelial cell proliferation	-2.38574	0	12550,18053,19014	Cdh1,Ngfr,Med1	3/171
1_Member	GO Biological Processes	GO:0008544	epidermis development	-2.32445	0	12550,18053,19014,270893	Cdh1,Ngfr,Med1,Tmem132e	4/362
1_Member	GO Biological Processes	GO:0001890	placenta development	-2.20893	0	12550,19014,67971	Cdh1,Med1,Tppp3	3/198
1_Member	GO Biological Processes	GO:0043588	skin development	-1.64951	0	12550,18053,19014	Cdh1,Ngfr,Med1	3/320
1_Member	GO Biological Processes	GO:0030336	negative regulation of cell migration	-1.62172	0	12550,18053,77574	Cdh1,Ngfr,Tcaf1	3/328
1_Member	GO Biological Processes	GO:2000146	negative regulation of cell motility	-1.56843	0	12550,18053,77574	Cdh1,Ngfr,Tcaf1	3/344
1_Member	GO Biological Processes	GO:0040013	negative regulation of locomotion	-1.51184	0	12550,18053,77574	Cdh1,Ngfr,Tcaf1	3/362
1_Member	GO Biological Processes	GO:0050678	regulation of epithelial cell proliferation	-1.31746	0	12550,18053,19014	Cdh1,Ngfr,Med1	3/433
2_Summary	GO Biological Processes	GO:1903829	positive regulation of protein localization	-3.2402	0	12550,17762,18053,22044,77574,217154,56808,16524	Cdh1,Mapt,Ngfr,Trh,Tcaf1,Stac2,Cacna2d2,Kcnj9	8/-
2_Member	GO Biological Processes	GO:1903829	positive regulation of protein localization	-3.2402	0	12550,17762,18053,22044,77574,217154	Cdh1,Mapt,Ngfr,Trh,Tcaf1,Stac2	6/556
2_Member	GO Biological Processes	GO:1905475	regulation of protein localization to membrane	-3.03893	0	12550,56808,77574,217154	Cdh1,Cacna2d2,Tcaf1,Stac2	4/230
2_Member	GO Biological Processes	GO:1904375	regulation of protein localization to cell periphery	-2.42181	0	12550,56808,217154	Cdh1,Cacna2d2,Stac2	3/166
2_Member	GO Biological Processes	GO:0070201	regulation of establishment of protein localization	-1.50466	0	12550,17762,22044,77574	Cdh1,Mapt,Trh,Tcaf1	4/635
2_Member	GO Biological Processes	GO:0034765	regulation of monoatomic ion transmembrane transport	-1.49671	0	16524,77574,217154	Kcnj9,Tcaf1,Stac2	3/367
2_Member	GO Biological Processes	GO:1904951	positive regulation of establishment of protein localization	-1.47301	0	12550,22044,77574	Cdh1,Trh,Tcaf1	3/375
3_Summary	GO Biological Processes	GO:0051960	regulation of nervous system development	-3.14013	0	12550,14268,14359,17762,18053,18429,13038,56808,96875	Cdh1,Fn1,Fxr1,Mapt,Ngfr,Oxt,Ctsk,Cacna2d2,Prg4	9/-
3_Member	GO Biological Processes	GO:0051960	regulation of nervous system development	-3.14013	0	12550,14268,14359,17762,18053,18429	Cdh1,Fn1,Fxr1,Mapt,Ngfr,Oxt	6/581
3_Member	GO Biological Processes	GO:0030516	regulation of axon extension	-3.0251	0	12550,14268,17762	Cdh1,Fn1,Mapt	3/102
3_Member	GO Biological Processes	GO:0061387	regulation of extent of cell growth	-2.83204	0	12550,14268,17762	Cdh1,Fn1,Mapt	3/119
3_Member	Reactome Gene Sets	R-MMU-1474228	Degradation of the extracellular matrix	-2.7808	0	12550,13038,14268	Cdh1,Ctsk,Fn1	3/124
3_Member	GO Biological Processes	GO:0050804	modulation of chemical synaptic transmission	-2.51172	0	12550,14359,17762,18053,18429,56808	Cdh1,Fxr1,Mapt,Ngfr,Oxt,Cacna2d2	6/772
3_Member	GO Biological Processes	GO:0099177	regulation of trans-synaptic signaling	-2.50894	0	12550,14359,17762,18053,18429,56808	Cdh1,Fxr1,Mapt,Ngfr,Oxt,Cacna2d2	6/773
3_Member	GO Biological Processes	GO:0050770	regulation of axonogenesis	-2.3577	0	12550,14268,17762	Cdh1,Fn1,Mapt	3/175
3_Member	GO Biological Processes	GO:0051962	positive regulation of nervous system development	-2.23445	0	14268,14359,17762,18429	Fn1,Fxr1,Mapt,Oxt	4/384
3_Member	GO Biological Processes	GO:0048638	regulation of developmental growth	-2.18022	0	12550,14268,17762,56808	Cdh1,Fn1,Mapt,Cacna2d2	4/398
3_Member	GO Biological Processes	GO:0008361	regulation of cell size	-2.09967	0	12550,14268,17762	Cdh1,Fn1,Mapt	3/217
3_Member	GO Biological Processes	GO:0048639	positive regulation of developmental growth	-2.08339	0	14268,17762,56808	Fn1,Mapt,Cacna2d2	3/220
3_Member	GO Biological Processes	GO:0050767	regulation of neurogenesis	-1.92319	0	12550,14268,14359,17762	Cdh1,Fn1,Fxr1,Mapt	4/473
3_Member	Reactome Gene Sets	R-MMU-1474244	Extracellular matrix organization	-1.87843	0	12550,13038,14268	Cdh1,Ctsk,Fn1	3/262
3_Member	KEGG Pathway	mmu04010	MAPK signaling pathway - Mus musculus (house mouse)	-1.72647	0	17762,18053,56808	Mapt,Ngfr,Cacna2d2	3/299
3_Member	GO Biological Processes	GO:0034329	cell junction assembly	-1.70014	0	12550,14268,17762	Cdh1,Fn1,Mapt	3/306
3_Member	GO Biological Processes	GO:0001818	negative regulation of cytokine production	-1.65659	0	14268,14359,96875	Fn1,Fxr1,Prg4	3/318
3_Member	GO Biological Processes	GO:0050769	positive regulation of neurogenesis	-1.65304	0	14268,14359,17762	Fn1,Fxr1,Mapt	3/319
3_Member	GO Biological Processes	GO:0045927	positive regulation of growth	-1.63551	0	14268,17762,56808	Fn1,Mapt,Cacna2d2	3/324
3_Member	GO Biological Processes	GO:0010975	regulation of neuron projection development	-1.63525	0	12550,14268,17762,18053	Cdh1,Fn1,Mapt,Ngfr	4/578
3_Member	GO Biological Processes	GO:0034330	cell junction organization	-1.54202	0	12550,14268,17762,56808	Cdh1,Fn1,Mapt,Cacna2d2	4/618
3_Member	GO Biological Processes	GO:0010038	response to metal ion	-1.4442	0	12550,14268,17762	Cdh1,Fn1,Mapt	3/385
3_Member	GO Biological Processes	GO:0050808	synapse organization	-1.39724	0	12550,17762,56808	Cdh1,Mapt,Cacna2d2	3/402
3_Member	GO Biological Processes	GO:0040008	regulation of growth	-1.39006	0	12550,14268,17762,56808	Cdh1,Fn1,Mapt,Cacna2d2	4/691
3_Member	GO Biological Processes	GO:0032535	regulation of cellular component size	-1.37859	0	12550,14268,17762	Cdh1,Fn1,Mapt	3/409
4_Summary	GO Biological Processes	GO:0032890	regulation of organic acid transport	-2.97676	0	18429,22044,64051,19014,71760,12550,13038,17762	Oxt,Trh,Sv2a,Med1,Etnppl,Cdh1,Ctsk,Mapt	8/-
4_Member	GO Biological Processes	GO:0032890	regulation of organic acid transport	-2.97676	0	18429,22044,64051	Oxt,Trh,Sv2a	3/106
4_Member	GO Biological Processes	GO:0051952	regulation of amine transport	-2.89663	0	18429,22044,64051	Oxt,Trh,Sv2a	3/113
4_Member	GO Biological Processes	GO:0048545	response to steroid hormone	-2.65299	0	18429,19014,22044,71760	Oxt,Med1,Trh,Etnppl	4/293
4_Member	GO Biological Processes	GO:0051384	response to glucocorticoid	-2.44402	0	18429,22044,71760	Oxt,Trh,Etnppl	3/163
4_Member	GO Biological Processes	GO:0031960	response to corticosteroid	-2.30365	0	18429,22044,71760	Oxt,Trh,Etnppl	3/183
4_Member	GO Biological Processes	GO:0097305	response to alcohol	-2.22657	0	12550,13038,18429,22044	Cdh1,Ctsk,Oxt,Trh	4/386
4_Member	GO Biological Processes	GO:0031667	response to nutrient levels	-1.64501	0	13038,17762,18429,71760	Ctsk,Mapt,Oxt,Etnppl	4/574
5_Summary	KEGG Pathway	mmu04921	Oxytocin signaling pathway - Mus musculus (house mouse)	-2.52139	0	16524,18429,56808	Kcnj9,Oxt,Cacna2d2	3/-
5_Member	KEGG Pathway	mmu04921	Oxytocin signaling pathway - Mus musculus (house mouse)	-2.52139	0	16524,18429,56808	Kcnj9,Oxt,Cacna2d2	3/153
6_Summary	GO Biological Processes	GO:0051897	positive regulation of phosphatidylinositol 3-kinase/protein kinase B signal transduction	-2.14434	0	14268,18053,21832	Fn1,Ngfr,Thpo	3/-
6_Member	GO Biological Processes	GO:0051897	positive regulation of phosphatidylinositol 3-kinase/protein kinase B signal transduction	-2.14434	0	14268,18053,21832	Fn1,Ngfr,Thpo	3/209
6_Member	GO Biological Processes	GO:0051896	regulation of phosphatidylinositol 3-kinase/protein kinase B signal transduction	-1.73412	0	14268,18053,21832	Fn1,Ngfr,Thpo	3/297
7_Summary	GO Biological Processes	GO:0051603	proteolysis involved in protein catabolic process	-1.97111	0	13038,19185,66244,67615,78294,17762,22420	Ctsk,Psmd4,Nemf,Ube2r2,Rps27a,Mapt,Wnt6	7/-
7_Member	GO Biological Processes	GO:0051603	proteolysis involved in protein catabolic process	-1.97111	0	13038,19185,66244,67615,78294	Ctsk,Psmd4,Nemf,Ube2r2,Rps27a	5/714
7_Member	KEGG Pathway	mmu05022	Pathways of neurodegeneration - multiple diseases - Mus musculus (house mouse)	-1.89864	0	17762,19185,22420,78294	Mapt,Psmd4,Wnt6,Rps27a	4/481
7_Member	KEGG Pathway	mmu05012	Parkinson disease - Mus musculus (house mouse)	-1.8266	0	17762,19185,78294	Mapt,Psmd4,Rps27a	3/274
7_Member	GO Biological Processes	GO:0019941	modification-dependent protein catabolic process	-1.60883	0	19185,66244,67615,78294	Psmd4,Nemf,Ube2r2,Rps27a	4/589
7_Member	GO Biological Processes	GO:0043632	modification-dependent macromolecule catabolic process	-1.59702	0	19185,66244,67615,78294	Psmd4,Nemf,Ube2r2,Rps27a	4/594
7_Member	KEGG Pathway	mmu05010	Alzheimer disease - Mus musculus (house mouse)	-1.43293	0	17762,19185,22420	Mapt,Psmd4,Wnt6	3/389
8_Summary	GO Biological Processes	GO:0071363	cellular response to growth factor stimulus	-1.6623	0	13038,18053,19014,20340	Ctsk,Ngfr,Med1,Glg1	4/-
8_Member	GO Biological Processes	GO:0071363	cellular response to growth factor stimulus	-1.6623	0	13038,18053,19014,20340	Ctsk,Ngfr,Med1,Glg1	4/567
8_Member	GO Biological Processes	GO:0070848	response to growth factor	-1.59233	0	13038,18053,19014,20340	Ctsk,Ngfr,Med1,Glg1	4/596
9_Summary	GO Biological Processes	GO:0048598	embryonic morphogenesis	-1.41956	0	14268,19014,22420,242291	Fn1,Med1,Wnt6,Bpnt2	4/-
9_Member	GO Biological Processes	GO:0048598	embryonic morphogenesis	-1.41956	0	14268,19014,22420,242291	Fn1,Med1,Wnt6,Bpnt2	4/676

## Sheet: GSEA genes
NAME	SIZE	ES	NES	NOM p-val	FDR q-val	FWER p-val	RANK AT MAX LEADING EDGE
GOBP_NEURAL_PRECURSOR_CELL_PROLIFERATION	18	0.501382	1.78777	0.0122699	0.033284	0.011	72
GOBP_REGULATION_OF_APOPTOTIC_SIGNALING_PATHWAY	27	0.276748	1.1073	0.31761	0.490385	0.28	122
GOBP_REGULATION_OF_NEURON_DIFFERENTIATION	20	0.289757	1.08499	0.340984	0.345168	0.293	75
NAME	SYMBOL	RANK IN GENE LIST	RANK METRIC SCORE	RUNNING ES	CORE ENRICHMENT
row_0	Ngfr	0	2.85393	0.242874	Yes
row_1	Spint1	16	1.23521	0.332623	Yes
row_2	Dct	21	1.14762	0.426189	Yes
row_3	Tead3	56	0.778258	0.457584	Yes
row_4	Fabp7	72	0.695254	0.501382	Yes
GOBP_REGULATION_OF_APOPTOTIC_SIGNALING_PATHWAY
NAME	SYMBOL	RANK IN GENE LIST	RANK METRIC SCORE	RUNNING ES	CORE ENRICHMENT
row_0	Ngfr	0	2.85393	0.202041	Yes
row_1	Hmgb2	38	0.972528	0.232627	Yes
row_2	Ccar2	66	0.711077	0.255046	Yes
row_3	Bmf	102	0.57425	0.259505	Yes
row_4	Ackr3	122	0.521112	0.276748	Yes
GOBP_REGULATION_OF_NEURON_DIFFERENTIATION
NAME	SYMBOL	RANK IN GENE LIST	RANK METRIC SCORE	RUNNING ES	CORE ENRICHMENT
row_0	Ngfr	0	2.85393	0.241563	Yes
row_1	Med1	59	0.76706	0.246941	Yes
row_2	Dnmt3b	75	0.687798	0.289757	Yes
