# Supplementary material for: p75 Neurotrophin Receptor Shapes the Dynamics of Adult Hippocampal Neurogenesis in Alzheimer's Disease
Source: Research Square preprint supplement (doi:10.21203/rs.3.rs-7790527/v1), 2025-10-22
Supplement: Supplementary file 2 [file 60d9e5a974b17df62bcd643d.xlsx]

## Sheet: Up & Down Regulated Genes
Gene_ID	logFC	logCPM	LR	PValue	FDR
Wdfy1	1.73086	4.52728	33.7322	6.32445e-09	8.77517e-05
Tsc22d3	1.40936	6.51748	30.193	3.91123e-08	0.000271342
Thbs4	1.87066	3.47103	25.4183	4.61531e-07	0.00213458
Ly6c1	1.231	5.40242	21.1794	4.1824e-06	0.0145077
Hes5	-1.48768	6.04582	20.4069	6.26049e-06	0.0173729
Ccdc12	1.22971	4.46515	18.839	1.4223e-05	0.0328907
Etnppl	2.30144	4.44062	16.5392	4.7655e-05	0.094459
Ube2h	-0.87565	7.61202	15.5253	8.14098e-05	0.141195
4833411C07Rik	4.49523	0.685276	14.2728	0.000158136	0.160804
D630041G03Rik	1.50665	3.53019	14.0482	0.000178189	0.160804
Ezh2	1.1121	4.72582	14.0487	0.000178139	0.160804
Ide	0.960349	5.19158	14.4822	0.000141493	0.160804
Ngfr	-2.76789	2.27893	14.1247	0.00017108	0.160804
Plin4	3.74579	2.56278	14.2761	0.000157856	0.160804
Ramp2	1.26533	4.36039	13.9732	0.000185432	0.160804
Smim3	1.06745	5.25534	14.7302	0.000124046	0.160804
Sema4f	-1.43004	5.56955	13.491	0.000239707	0.195643
Txnip	1.4419	4.67786	13.1169	0.000292639	0.225576
Hist1h4h	2.99857	1.02499	12.977	0.000315341	0.230282
H2-Q1	7.8003	0.0485289	12.8403	0.00033924	0.235348
Zcchc24	0.864941	6.42703	12.5894	0.000387946	0.256321
Ankrd23	5.62601	-0.165405	12.1672	0.000486381	0.27313
Cpm	1.38519	3.36763	12.1453	0.000492126	0.27313
Mfsd2a	1.0739	6.17715	12.2532	0.000464454	0.27313
Mrap2	-1.66322	3.24588	12.2195	0.000472921	0.27313
1700012B09Rik	4.63585	0.314227	11.9547	0.000545101	0.280122
Fzd10	-5.16072	1.08962	12.0226	0.000525605	0.280122
Iqce	-1.79527	2.832	11.7855	0.000596923	0.295797
Srp54b	-5.19921	3.48582	11.7142	0.000620248	0.296757
Mt2	1.09449	8.9022	11.5518	0.000676833	0.308448
Ror2	-7.29248	0.385672	11.5183	0.000689144	0.308448
Ccdc151	3.22523	0.977035	10.7697	0.00103177	0.433813
Mthfd2	1.40227	4.28941	10.8002	0.00101488	0.433813
Klf15	0.758181	5.32284	10.6136	0.00112259	0.452157
Slc25a3	-0.737891	10.201	10.5842	0.00114058	0.452157
Dnajc1	0.826885	6.62928	10.2672	0.00135418	0.507818
Myo1f	-2.57113	1.55816	10.2895	0.00133792	0.507818
Zbtb38	1.79587	2.57592	10.1159	0.00146999	0.536739
Clgn	2.19582	1.67819	9.90853	0.00164514	0.584778
Thrsp	0.826987	4.83558	9.86356	0.00168585	0.584778
Slc2a1	0.63125	7.08005	9.80538	0.00174002	0.588849
6430573F11Rik	-1.11638	4.24812	9.48484	0.00207177	0.616872
Ccdc37	1.74726	1.82652	9.55571	0.00199328	0.616872
Fnip2	-1.1265	4.082	9.52878	0.00202275	0.616872
Gjb6	0.829185	6.51501	9.48919	0.00206686	0.616872
Gpank1	-1.0141	4.23429	9.39271	0.0021785	0.616872
Proca1	-4.264	0.4339	9.40255	0.00216684	0.616872
S1pr3	-6.40484	0.789116	9.41084	0.00215707	0.616872
Wnt2	1.28789	3.01222	9.50738	0.00204647	0.616872
Dio2	0.710721	7.6886	9.34509	0.00223584	0.620446
Mib1	2.64494	0.485759	9.26952	0.00232999	0.625274
Piezo2	3.59482	1.35353	9.19963	0.00242064	0.625274
Zbtb16	0.876534	5.06644	9.2521	0.00235226	0.625274
Zcchc7	0.769117	5.54656	9.18993	0.0024335	0.625274
1700094D03Rik	0.948072	4.35668	8.97627	0.00273508	0.630653
Arrdc3	1.04597	5.56394	8.89246	0.0028635	0.630653
Cdk19	0.698794	6.46447	8.9213	0.00281863	0.630653
Dnajc28	0.936489	4.02012	8.91835	0.0028232	0.630653
Gpt2	0.859517	5.72894	9.06079	0.0026115	0.630653
Mettl16	0.976023	4.06491	8.89711	0.00285622	0.630653
Ss18	0.622259	6.21586	9.05645	0.00261769	0.630653
Ubxn2b	0.823495	5.02855	8.98968	0.00271508	0.630653
Zfp937	1.07187	4.35622	8.95898	0.00276109	0.630653
Anxa1	2.91298	0.880664	8.77955	0.00304626	0.650909
Atf5	0.7	6.34907	8.77773	0.0030493	0.650909
Ly6a	0.789055	5.40835	8.67711	0.00322231	0.677418
Arhgef10	0.812152	5.66771	8.59784	0.00336562	0.685325
Fam83d	1.47146	2.45497	8.61182	0.00333988	0.685325
Proser3	-6.30075	0.357344	8.575	0.0034081	0.685325
Fam69b	-0.960503	5.40188	8.50799	0.00353589	0.692256
Myh7b	-3.8113	0.527041	8.50467	0.00354236	0.692256
Gm11681	1.74476	3.18734	8.47677	0.00359711	0.693193
Spag17	3.2355	0.470227	8.45139	0.00364764	0.693302
Ephx2	0.954815	4.59527	8.39584	0.00376081	0.699546
Fam150b	1.68964	1.61682	8.38595	0.00378133	0.699546
Cdc37l1	0.723881	7.1692	8.31644	0.00392877	0.707945
Pde1b	-0.816844	5.32775	8.31839	0.00392457	0.707945
Bcl2l15	3.05486	0.514389	8.2265	0.00412831	0.725067
Upf2	0.576566	6.3431	8.24822	0.0040792	0.725067
Arrdc1	-1.71928	2.42091	7.83922	0.00511248	0.739418
Cfap43	2.35851	1.489	8.06605	0.00451024	0.739418
Fabp7	-1.01692	6.24263	7.86781	0.00503225	0.739418
Fam107a	0.807893	7.19314	7.98319	0.00472136	0.739418
Fkbp5	0.844022	5.79461	7.83798	0.00511597	0.739418
Hsf4	-5.77929	0.422476	7.95244	0.00480225	0.739418
Hspb8	0.763249	6.07837	8.04592	0.00456061	0.739418
Htr7	-1.26085	3.12485	7.88792	0.00497662	0.739418
Impad1	0.760531	5.81394	8.04633	0.0045596	0.739418
Mmp14	-0.910936	4.43598	7.84293	0.00510199	0.739418
Myom3	-2.68228	1.39655	8.06903	0.00450282	0.739418
Nde1	0.994017	4.64484	7.85696	0.00506256	0.739418
Opa3	1.16035	4.0716	7.94697	0.00481678	0.739418
Oprk1	-3.10463	0.847345	7.98681	0.00471194	0.739418
Pifo	3.54595	0.203772	8.02017	0.00462593	0.739418
Slc35e4	-1.22156	3.34155	8.16065	0.0042809	0.739418
Tprkb	0.712947	6.47489	7.89283	0.00496311	0.739418
Gjc3	1.03361	5.22951	7.79977	0.00522528	0.747431
Coro1a	-0.73297	5.00602	7.75969	0.00534252	0.748763
Mobp	0.96621	7.12735	7.76417	0.00532928	0.748763
Lpin3	2.01775	1.33427	7.69876	0.00552586	0.766714
Eef1d	0.614252	6.2911	7.63045	0.00573911	0.779167
Hn1l	-2.25692	1.39015	7.60453	0.00582219	0.779167
Ino80e	-1.23223	2.71265	7.59895	0.00584024	0.779167
Sgk3	1.02226	4.14257	7.61525	0.00578766	0.779167
Spidr	1.88566	1.67051	7.5558	0.00598174	0.790444
Pglyrp1	2.38575	1.01013	7.47901	0.00624223	0.794596
Phka1	0.701225	5.201	7.48873	0.00620864	0.794596
Spock2	0.874474	4.61984	7.50585	0.00614991	0.794596
Zfp941	-0.913751	4.43218	7.50427	0.00615527	0.794596
Ezr	0.826622	6.20532	7.3922	0.00655072	0.804347
Hmbox1	-3.32507	0.543245	7.39891	0.00652634	0.804347
P4ha1	0.833996	5.21865	7.39474	0.00654147	0.804347
Sec14l3	-6.16405	1.45637	7.42186	0.00644363	0.804347
4930451G09Rik	-3.00238	0.594637	7.35671	0.00668131	0.813186
S100b	0.561355	8.39046	7.3012	0.00689086	0.82423
Topors	0.601437	5.69481	7.30706	0.0068684	0.82423
Ccdc66	1.13703	3.90396	7.21932	0.00721232	0.827972
Mvd	-1.02561	5.32781	7.21019	0.00724909	0.827972
Phyhd1	0.866471	4.36091	7.26109	0.00704643	0.827972
Ppp1r3b	1.55698	2.48821	7.2025	0.00728019	0.827972
Rspo3	-0.761896	4.80486	7.21223	0.00724085	0.827972
Slc13a5	-1.88431	2.3397	7.22275	0.00719854	0.827972
Gm13889	-0.654618	6.34992	7.18087	0.00736851	0.831204
Kcnh2	-1.24463	3.74712	7.12617	0.0075967	0.850034
Zfp839	0.816829	4.45299	7.08307	0.00778158	0.863755
Luc7l	0.622348	6.27389	7.06692	0.007852	0.864654
Supt20	2.13403	0.823889	7.04992	0.0079269	0.866029
Kcnk6	-2.38033	1.09536	7.01031	0.00810418	0.87848
Arsk	0.879407	3.90301	6.8172	0.00902839	0.897409
Ccdc173	1.1577	3.27725	6.74132	0.00942047	0.897409
Cyp2j9	0.822354	4.16087	6.92606	0.00849485	0.897409
Fam71e1	-2.90658	1.22267	6.73706	0.00944301	0.897409
Fcgrt	1.16511	3.08412	6.94711	0.00839548	0.897409
Htr5b	2.13005	0.97294	6.79706	0.00913081	0.897409
Kctd8	-1.4264	2.59418	6.80103	0.00911054	0.897409
Klf6	0.677947	6.31535	6.78492	0.00919314	0.897409
Morn1	-2.32682	1.2013	6.75403	0.0093536	0.897409
Ormdl3	0.657112	5.20644	6.7479	0.00938582	0.897409
Pard3	0.73533	5.89625	6.87172	0.00875701	0.897409
Plin3	0.833768	4.28147	6.75756	0.00933512	0.897409
Slc44a1	0.700561	5.60578	6.82528	0.00898764	0.897409
Snora30	3.06661	0.0541194	6.8909	0.00866355	0.897409
Spata13	0.716069	5.22533	6.78641	0.00918544	0.897409
Top2a	1.59489	2.17139	6.75157	0.0093665	0.897409
Tspan9	-1.00985	3.93479	6.87625	0.00873487	0.897409
Twf2	0.729462	5.17357	6.81627	0.00903309	0.897409
9630001P10Rik	-5.58262	0.639091	6.71317	0.00957033	0.903322
Ak7	1.86389	1.68031	6.69119	0.00968907	0.903999
Plcd4	1.04026	3.40338	6.68774	0.0097078	0.903999
Mast2	-0.892829	3.63813	6.66067	0.00985637	0.911714
Crebbp	0.496893	6.7642	6.6411	0.00996526	0.913831
Tmem159	-1.2117	2.78073	6.63294	0.010011	0.913831
Rn45s	1.20149	12.9812	6.5787	0.0103206	0.91794
Shcbp1	3.07807	0.146262	6.61161	0.0101316	0.91794
Usp9x	0.892842	4.07473	6.58524	0.0102828	0.91794
Zdhhc23	-3.15812	1.03622	6.58014	0.0103123	0.91794
1500026H17Rik	-1.72751	1.91956	6.56198	0.010418	0.920702
1700096K18Rik	-1.52155	2.01245	6.49129	0.0108404	0.945753
Bcas1	0.78472	7.92199	6.48057	0.010906	0.945753
Zfp873	-2.4731	0.779892	6.49184	0.0108371	0.945753
Phf13	-0.649346	5.48761	6.43297	0.0112021	0.963384
Stk32a	3.21781	0.224364	6.42568	0.0112482	0.963384
Gmeb1	0.70939	5.30451	6.39377	0.0114522	0.973086
Zfp358	-0.851165	4.37062	6.38611	0.0115017	0.973086
Irg1	-2.06223	1.23281	6.37511	0.0115732	0.973198
Fdft1	-1.03991	4.19907	6.36421	0.0116445	0.973298
Mt1	0.747206	9.65192	6.35255	0.0117213	0.973848
Efna2	-0.845677	3.88361	6.32676	0.0118929	0.980601
Man2c1	-0.91035	3.42748	6.31918	0.0119439	0.980601
Golgb1	0.677732	4.56069	6.26535	0.0123122	0.995127
Med13l	0.553387	6.95278	6.26193	0.012336	0.995127
Polr3b	1.3106	2.76572	6.28127	0.0122021	0.995127
0610007P14Rik	-0.0792438	6.80337	0.139637	0.708642	0.999956
0610009B22Rik	0.242511	3.64683	0.107122	0.743444	0.999956
0610009L18Rik	-1.26263	2.72531	5.84569	0.0156152	0.999956
0610009O20Rik	0.566917	3.60328	1.90669	0.167331	0.999956
0610010F05Rik	0.0893613	6.25373	0.176862	0.674084	0.999956
0610010K14Rik	0.43433	3.87182	1.40774	0.235433	0.999956
0610011F06Rik	-0.0311845	3.59531	0.00584671	0.93905	0.999956
0610012G03Rik	-0.132252	5.25623	0.252031	0.615649	0.999956
0610030E20Rik	0.568422	4.37867	3.45915	0.0629027	0.999956
0610037L13Rik	0.00558977	4.05174	0.000159258	0.989931	0.999956
0610040B10Rik	-1.02636	1.82355	2.32414	0.12738	0.999956
0610040F04Rik	0.683469	0.514968	0.47654	0.489994	0.999956
0610040J01Rik	-0.606968	2.02752	1.08043	0.298601	0.999956
0610043K17Rik	0.621775	1.00237	0.448192	0.503195	0.999956
1110001J03Rik	-0.282457	6.77643	1.59138	0.207129	0.999956
1110002L01Rik	-0.1809	3.07269	0.158132	0.690882	0.999956
1110004E09Rik	-0.0611096	4.04529	0.0335482	0.854671	0.999956
1110004F10Rik	-0.16505	6.85112	0.284626	0.593685	0.999956
1110007C09Rik	-0.229841	2.8862	0.207189	0.64898	0.999956
1110008F13Rik	-0.172384	5.5423	0.490974	0.483493	0.999956
1110008L16Rik	0.862225	1.50742	1.16797	0.279819	0.999956
1110008P14Rik	-0.578215	5.64683	1.014	0.313948	0.999956
1110012L19Rik	0.686568	1.67977	0.573219	0.448982	0.999956
1110017D15Rik	0.0918303	1.21984	0.00965317	0.921733	0.999956
1110020A21Rik	0.802056	0.276461	0.436179	0.508972	0.999956
1110032A03Rik	-0.0211679	4.91501	0.0036107	0.952085	0.999956
1110032F04Rik	-0.699406	4.80129	1.71234	0.190682	0.999956
1110034G24Rik	0.271431	2.20832	0.259542	0.610435	0.999956
1110037F02Rik	-0.0725247	5.461	0.0900469	0.764118	0.999956
1110038B12Rik	-0.110075	3.87865	0.0657757	0.79759	0.999956
1110038F14Rik	0.140591	5.69246	0.263965	0.607409	0.999956
1110046J04Rik	-0.349412	0.651426	0.141829	0.70647	0.999956
1110051M20Rik	0.0812712	6.74795	0.124579	0.72412	0.999956
1110059E24Rik	0.027708	5.46004	0.011466	0.914726	0.999956
1110059G10Rik	0.0808711	5.68459	0.113487	0.736208	0.999956
1110065P20Rik	-0.038226	6.84002	0.0281591	0.866735	0.999956
1190002N15Rik	-0.303519	5.54589	0.976161	0.323148	0.999956
1190007I07Rik	0.192423	3.64111	0.236603	0.62667	0.999956
1200014J11Rik	0.213931	5.27993	0.705473	0.400951	0.999956
1300002E11Rik	-0.431225	3.46995	0.652863	0.419091	0.999956
1500004A13Rik	0.168734	4.59295	0.352803	0.552531	0.999956
1500009C09Rik	-0.26987	5.51501	1.05114	0.305244	0.999956
1500009L16Rik	-0.109608	4.9304	0.102552	0.748788	0.999956
1500011B03Rik	0.0374304	7.94338	0.018073	0.893058	0.999956
1500011K16Rik	0.0893675	6.55827	0.144002	0.704334	0.999956
1500012F01Rik	0.113619	6.87757	0.227755	0.633194	0.999956
1500015A07Rik	-0.238228	2.91607	0.305005	0.580762	0.999956
1500015O10Rik	-0.248828	5.24622	0.0263153	0.871133	0.999956
1600002H07Rik	-0.637051	2.58148	1.6828	0.194553	0.999956
1600002K03Rik	0.732709	2.12604	1.80497	0.179113	0.999956
1600012H06Rik	-0.0904974	4.03161	0.0828954	0.773411	0.999956
1600014C10Rik	-0.127221	4.27415	0.143981	0.704355	0.999956
1600020E01Rik	-0.318902	2.35678	0.277409	0.598405	0.999956
1600029O15Rik	0.287623	2.01897	0.237058	0.626339	0.999956
1700001L05Rik	-0.76092	1.3973	0.718686	0.396575	0.999956
1700001L19Rik	-0.237475	3.52183	0.259339	0.610575	0.999956
1700003E16Rik	-0.183426	2.17238	0.0769709	0.781445	0.999956
1700003M07Rik	-0.502627	4.95217	1.96297	0.161197	0.999956
1700007G11Rik	0.721879	0.274134	0.384688	0.535105	0.999956
1700007K09Rik	0.3089	0.61046	0.0635454	0.800978	0.999956
1700007K13Rik	-0.838673	0.826934	0.987033	0.320469	0.999956
1700008J07Rik	0.0515157	1.50606	0.00305717	0.955906	0.999956
1700012D01Rik	0.315079	2.1641	0.310081	0.57763	0.999956
1700012D14Rik	-2.16719	-0.0153684	2.53904	0.111062	0.999956
1700016K19Rik	0.899214	1.50368	1.87359	0.171065	0.999956
1700017B05Rik	0.373863	4.27984	1.51557	0.218291	0.999956
1700019D03Rik	0.733616	2.06572	1.14433	0.284739	0.999956
1700019G17Rik	0.308941	2.29959	0.322454	0.570137	0.999956
1700020I14Rik	-1.15323	2.62729	3.7734	0.0520737	0.999956
1700021F05Rik	0.249897	4.23766	0.59195	0.441666	0.999956
1700021K19Rik	-0.200836	5.01802	0.525211	0.468627	0.999956
1700024P16Rik	0.717049	2.07293	1.39628	0.237347	0.999956
1700025G04Rik	0.150329	6.45057	0.589068	0.44278	0.999956
1700026D08Rik	1.28334	1.32281	2.22369	0.135908	0.999956
1700026L06Rik	0.970575	0.0875012	0.48627	0.485596	0.999956
1700028K03Rik	1.38633	0.545473	2.04291	0.152917	0.999956
1700028P14Rik	-0.098305	0.99358	0.00916171	0.923745	0.999956
1700029J07Rik	0.269544	2.98177	0.163607	0.685857	0.999956
1700030C10Rik	-0.528634	2.50465	0.598954	0.438977	0.999956
1700030J22Rik	0.0161565	2.33658	0.000651235	0.979641	0.999956
1700030K09Rik	-0.631195	1.9086	0.983585	0.321315	0.999956
1700034H15Rik	-0.342284	0.611435	0.0923581	0.7612	0.999956
1700037C18Rik	-0.793627	0.943738	0.748409	0.38698	0.999956
1700037H04Rik	-0.454127	5.47149	1.943	0.163343	0.999956
1700040L02Rik	0.203566	1.85472	0.0637432	0.800675	0.999956
1700042G15Rik	4.10323	2.20084	2.36827	0.123824	0.999956
1700047M11Rik	0.324729	2.45547	0.355919	0.550782	0.999956
1700048O20Rik	0.0184458	2.26866	0.000639831	0.97982	0.999956
1700049G17Rik	-0.0283475	3.11037	0.00327357	0.954374	0.999956
1700052K11Rik	0.635045	2.61946	1.30894	0.252586	0.999956
1700066M21Rik	-0.45193	4.15142	1.66655	0.196721	0.999956
1700084C01Rik	-0.215754	3.33458	0.212895	0.644508	0.999956
1700086L19Rik	-1.31727	2.73441	3.28952	0.0697235	0.999956
1700086O06Rik	-0.554343	3.3049	1.49699	0.221135	0.999956
1700088E04Rik	0.880779	1.13103	1.41124	0.234851	0.999956
1700093K21Rik	0.0535863	0.188876	0.00216088	0.962923	0.999956
1700101I11Rik	-0.758918	0.666036	0.374697	0.540455	0.999956
1700102P08Rik	-0.464995	2.02535	0.438752	0.507725	0.999956
1700109H08Rik	-1.7469	1.34239	5.42272	0.0198764	0.999956
1700112J16Rik	-0.223172	0.43942	0.0369442	0.847579	0.999956
1700113A16Rik	0.320472	0.439482	0.116759	0.732577	0.999956
1700123M08Rik	0.610524	0.838516	0.410873	0.521527	0.999956
1700123O20Rik	0.410503	4.01234	1.02852	0.310507	0.999956
1700124L16Rik	0.0508114	3.47334	0.010183	0.919621	0.999956
1810010D01Rik	-0.270266	0.217875	0.0381243	0.845194	0.999956
1810010H24Rik	0.103715	1.87595	0.0203504	0.886563	0.999956
1810011H11Rik	-1.93769	0.25599	1.62913	0.201823	0.999956
1810011O10Rik	2.48375	1.19038	4.53139	0.0332785	0.999956
1810013L24Rik	-0.186161	5.77489	0.571499	0.449664	0.999956
1810014B01Rik	0.780915	2.01606	1.76088	0.184515	0.999956
1810020O05Rik	-1.14732	1.31439	1.24449	0.264608	0.999956
1810021B22Rik	-0.0427456	0.960603	0.00223044	0.962332	0.999956
1810022K09Rik	-0.189693	5.39374	0.667738	0.413841	0.999956
1810026B05Rik	-0.0394846	4.42003	0.0148562	0.902989	0.999956
1810026J23Rik	-0.0874975	5.93488	0.160455	0.688738	0.999956
1810030O07Rik	0.15705	6.50231	0.409016	0.522469	0.999956
1810032O08Rik	0.18267	0.821177	0.0514329	0.820588	0.999956
1810037I17Rik	-0.119413	7.06601	0.30165	0.58285	0.999956
1810041H14Rik	-0.10489	0.573531	0.0123315	0.911579	0.999956
1810041L15Rik	-0.291107	6.00317	0.770251	0.38014	0.999956
1810043G02Rik	-0.0793285	3.88631	0.0427555	0.836186	0.999956
1810043H04Rik	-0.0886153	6.61754	0.0681505	0.794049	0.999956
1810044D09Rik	-1.29458	0.457741	0.851497	0.356129	0.999956
1810055G02Rik	0.319191	2.11226	0.249933	0.617122	0.999956
1810058I24Rik	0.0815861	4.53562	0.0525064	0.818758	0.999956
1810062O18Rik	0.685392	0.608187	0.282108	0.595323	0.999956
2010001A14Rik	-0.12437	1.77062	0.025347	0.873506	0.999956
2010005H15Rik	0.631791	0.732531	0.566545	0.451635	0.999956
2010012O05Rik	-0.0581372	5.00031	0.0278658	0.867425	0.999956
2010107E04Rik	-0.117216	8.27372	0.41505	0.519418	0.999956
2010107G23Rik	-0.18907	5.30888	0.411091	0.521416	0.999956
2010111I01Rik	-0.185382	5.40733	0.691012	0.40582	0.999956
2010204K13Rik	0.133415	5.89835	0.369248	0.543414	0.999956
2010300C02Rik	-0.0698817	7.01718	0.0625202	0.802556	0.999956
2010315B03Rik	-0.280828	3.38644	0.296728	0.585941	0.999956
2010320M18Rik	-0.128654	3.61696	0.109139	0.741126	0.999956
2210013O21Rik	-0.346438	4.67847	1.07359	0.300136	0.999956
2210015D19Rik	0.713662	2.45058	1.70533	0.191593	0.999956
2210016F16Rik	0.0658818	2.72189	0.0111974	0.915727	0.999956
2210016L21Rik	-0.125424	5.54931	0.200729	0.654133	0.999956
2210018M11Rik	0.163003	6.17934	0.299769	0.584027	0.999956
2210404O09Rik	0.280117	1.90721	0.198518	0.65592	0.999956
2210406O10Rik	-1.11782	1.23406	1.57179	0.209947	0.999956
2210408F21Rik	0.860224	3.54431	4.24968	0.0392577	0.999956
2210408I21Rik	-0.964797	2.29279	2.98579	0.0839983	0.999956
2210416O15Rik	-2.41702	-0.0563161	2.52815	0.111832	0.999956
2300009A05Rik	-0.475935	5.46402	3.23838	0.0719316	0.999956
2310002F09Rik	0.262043	3.7721	0.206748	0.649328	0.999956
2310009A05Rik	-0.239948	4.56042	0.653776	0.418766	0.999956
2310009B15Rik	-0.167036	4.04252	0.211732	0.645414	0.999956
2310010G23Rik	-2.00888	0.168412	2.13162	0.144288	0.999956
2310010J17Rik	-0.539161	4.02417	2.08939	0.148325	0.999956
2310011J03Rik	0.0495341	4.26278	0.0256877	0.872665	0.999956
2310015A10Rik	-0.368049	2.85316	0.645474	0.421735	0.999956
2310022A10Rik	-0.00143129	4.43357	1.92203e-05	0.996502	0.999956
2310022B05Rik	-0.272882	6.71425	1.39083	0.238265	0.999956
2310030G06Rik	-1.00865	0.106604	0.602214	0.437735	0.999956
2310033P09Rik	0.663323	5.07983	5.57313	0.0182381	0.999956
2310034G01Rik	0.357275	1.10665	0.125933	0.722686	0.999956
2310034O05Rik	1.10621	-0.104121	0.414112	0.51989	0.999956
2310035C23Rik	0.0314446	6.50523	0.023035	0.879366	0.999956
2310036O22Rik	0.138622	6.52082	0.346343	0.556191	0.999956
2310039H08Rik	-0.403892	1.85791	0.459529	0.497844	0.999956
2310045N01Rik	0.210064	4.61434	0.548357	0.45899	0.999956
2310047M10Rik	-0.270217	6.5805	1.27477	0.258873	0.999956
2310057M21Rik	0.240445	6.60873	0.863786	0.352681	0.999956
2310061I04Rik	0.203186	5.15239	0.677979	0.410284	0.999956
2310067B10Rik	-0.20688	4.43988	0.320699	0.571188	0.999956
2310069G16Rik	0.0267733	1.57052	0.00126941	0.971578	0.999956
2410002F23Rik	-0.398171	5.41232	1.36976	0.241853	0.999956
2410004B18Rik	0.132851	4.54327	0.217705	0.640794	0.999956
2410004P03Rik	1.22375	1.62733	3.23534	0.0720654	0.999956
2410006H16Rik	0.0432622	5.7788	0.0320434	0.857932	0.999956
2410015M20Rik	0.330466	5.27317	1.82033	0.177274	0.999956
2410016O06Rik	-0.145076	6.45093	0.211115	0.645895	0.999956
2410018L13Rik	-0.699532	0.127011	0.405712	0.524154	0.999956
2410089E03Rik	0.0690435	4.30077	0.0370645	0.847334	0.999956
2410127L17Rik	-0.152081	2.62284	0.0711498	0.78967	0.999956
2410131K14Rik	-0.239362	3.06722	0.333033	0.563879	0.999956
2500002B13Rik	0.89332	0.709123	0.71196	0.398794	0.999956
2500004C02Rik	0.303636	1.88717	0.252975	0.614988	0.999956
2510002D24Rik	-0.354334	5.23386	1.5419	0.214335	0.999956
2510009E07Rik	-0.500574	5.6972	3.60624	0.0575631	0.999956
2510039O18Rik	-0.152002	6.06172	0.444536	0.504941	0.999956
2610001J05Rik	-0.168045	5.68453	0.256297	0.612676	0.999956
2610002M06Rik	-0.33682	5.56023	1.60363	0.20539	0.999956
2610008E11Rik	0.110889	4.50112	0.160812	0.68841	0.999956
2610015P09Rik	0.730424	3.82025	3.76412	0.0523633	0.999956
2610035D17Rik	-0.481755	3.65655	1.27015	0.259738	0.999956
2610044O15Rik8	-0.204412	3.08561	0.192899	0.660515	0.999956
2610100L16Rik	-0.367809	5.39838	0.918109	0.337972	0.999956
2610301B20Rik	0.432121	3.7526	1.20037	0.273248	0.999956
2610306M01Rik	-0.073379	2.95216	0.0302376	0.861952	0.999956
2610316D01Rik	-0.542442	1.96764	0.76702	0.381141	0.999956
2610507B11Rik	-0.0386259	7.88269	0.0350455	0.8515	0.999956
2610507I01Rik	0.36211	2.96221	0.458187	0.498473	0.999956
2610524H06Rik	-0.740447	4.25299	4.55157	0.0328885	0.999956
2700029M09Rik	0.100916	6.25397	0.133551	0.714778	0.999956
2700038G22Rik	-1.66074	0.067175	0.711408	0.398977	0.999956
2700046G09Rik	0.976764	1.29334	1.90167	0.167891	0.999956
2700049A03Rik	0.98911	3.18608	5.39839	0.0201554	0.999956
2700054A10Rik	-0.685822	1.47729	0.906341	0.341087	0.999956
2700060E02Rik	0.0940382	4.91623	0.142849	0.705465	0.999956
2700062C07Rik	-0.418823	2.70795	0.892565	0.344783	0.999956
2700081O15Rik	0.208754	4.06413	0.274258	0.60049	0.999956
2700094K13Rik	-0.297702	4.13074	0.72619	0.394121	0.999956
2700097O09Rik	-0.0885002	3.77066	0.0587116	0.808544	0.999956
2700099C18Rik	0.19214	-0.0547491	0.0172158	0.89561	0.999956
2810001G20Rik	0.283691	3.46264	0.564093	0.452616	0.999956
2810002D19Rik	-0.0611647	2.36201	0.0131453	0.90872	0.999956
2810004N23Rik	0.510144	4.76881	2.51164	0.113008	0.999956
2810006K23Rik	0.39098	2.87096	0.585093	0.444323	0.999956
2810013P06Rik	0.179589	4.27521	0.249286	0.617578	0.999956
2810021J22Rik	0.798797	2.41815	1.64755	0.199292	0.999956
2810025M15Rik	0.588401	3.80329	2.88472	0.0894234	0.999956
2810029C07Rik	-1.12056	2.6028	5.69428	0.0170203	0.999956
2810032G03Rik	-0.823575	2.84152	2.59214	0.107395	0.999956
2810049E08Rik	-0.532527	3.82505	1.19932	0.273458	0.999956
2810403A07Rik	0.0236762	6.44326	0.00938773	0.922814	0.999956
2810403D21Rik	-0.334274	1.82718	0.260563	0.609733	0.999956
2810410L24Rik	0.277006	1.71409	0.100963	0.750677	0.999956
2810417H13Rik	-0.075537	1.06924	0.00713077	0.932703	0.999956
2810428I15Rik	-0.0115335	4.99359	0.00158037	0.968289	0.999956
2810454H06Rik	-3.94383	-0.0136394	2.5962	0.10712	0.999956
2810459M11Rik	-0.314799	3.60418	0.416105	0.518887	0.999956
2810468N07Rik	-0.0165087	4.74905	0.00410371	0.948922	0.999956
2810474O19Rik	0.179917	4.98156	0.465556	0.495039	0.999956
2900005J15Rik	-0.800417	1.40028	0.918453	0.337882	0.999956
2900008C10Rik	-0.341369	2.10591	0.224208	0.635852	0.999956
2900009J06Rik	0.311644	1.6456	0.169499	0.680558	0.999956
2900011O08Rik	-0.158203	7.27358	0.403337	0.525371	0.999956
2900026A02Rik	0.104337	5.11254	0.120436	0.728563	0.999956
2900041M22Rik	1.66104	0.470682	2.02235	0.155	0.999956
2900052N01Rik	-0.192063	4.85955	0.124258	0.724461	0.999956
2900055J20Rik	-0.118543	4.91818	0.121394	0.727528	0.999956
2900060B14Rik	0.38419	2.90343	0.532913	0.465385	0.999956
2900076A07Rik	-0.652278	2.98974	1.20201	0.272921	0.999956
2900079G21Rik	-0.829873	1.9827	1.45947	0.227014	0.999956
2900092D14Rik	-0.0811993	5.13976	0.0333058	0.855191	0.999956
2900097C17Rik	0.718455	5.11802	4.13207	0.0420779	0.999956
3010026O09Rik	-0.354746	1.84189	0.321302	0.570826	0.999956
3110001I22Rik	0.118553	2.30663	0.0357242	0.850086	0.999956
3110002H16Rik	0.626265	1.7606	0.685085	0.407841	0.999956
3110009E18Rik	0.0403925	1.6259	0.00361174	0.952078	0.999956
3110021A11Rik	-0.859519	1.22573	1.23306	0.266812	0.999956
3110021N24Rik	0.475741	0.0106908	0.0569565	0.811373	0.999956
3110035E14Rik	-0.0334022	9.1498	0.0101518	0.919744	0.999956
3110039I08Rik	-0.320254	6.20071	1.87244	0.171196	0.999956
3110039M20Rik	-0.487209	4.86406	2.49689	0.114072	0.999956
3110040N11Rik	-0.11245	2.55091	0.0434401	0.834899	0.999956
3110043O21Rik	0.0380463	5.98505	0.027811	0.867554	0.999956
3110052M02Rik	0.463672	3.24295	1.08152	0.298358	0.999956
3110056K07Rik	1.7706	1.19795	4.54398	0.0330346	0.999956
3110057O12Rik	-0.223877	3.23222	0.239486	0.624577	0.999956
3110062M04Rik	0.149065	3.91455	0.185945	0.666314	0.999956
3110070M22Rik	0.348207	0.897715	0.163044	0.686369	0.999956
3110082I17Rik	-0.0116457	3.34024	0.000726988	0.978489	0.999956
3110082J24Rik	0.921921	1.59239	1.60879	0.204661	0.999956
3300002I08Rik	-1.01475	0.222993	0.896532	0.343713	0.999956
3632451O06Rik	0.29484	3.53809	0.50625	0.476767	0.999956
3632454L22Rik	-0.0194696	1.04564	0.000608957	0.980313	0.999956
3830406C13Rik	-0.118853	4.99347	0.163402	0.686043	0.999956
4430402I18Rik	-0.943136	1.89947	1.07419	0.300001	0.999956
4632404H12Rik	-0.108396	3.92915	0.0555475	0.813677	0.999956
4632415L05Rik	0.0282563	4.40829	0.00834545	0.927212	0.999956
4632428N05Rik	-0.0665602	4.78632	0.0410634	0.839416	0.999956
4732471J01Rik	-0.718016	1.62464	1.01285	0.314221	0.999956
4732491K20Rik	-0.633297	0.974599	0.605047	0.436659	0.999956
4831440E17Rik	-0.277256	3.04889	0.276749	0.59884	0.999956
4833420G17Rik	0.148736	5.30843	0.292233	0.588793	0.999956
4833422C13Rik	0.718777	3.07683	2.27283	0.13166	0.999956
4833427G06Rik	0.181532	-0.100566	0.00905434	0.924192	0.999956
4833439L19Rik	-0.115972	6.23299	0.103289	0.747918	0.999956
4921504A21Rik	0.505396	-0.145768	0.0816224	0.775111	0.999956
4921524J17Rik	-0.434975	3.71489	0.413289	0.520305	0.999956
4921531C22Rik	-0.43025	2.34034	0.329658	0.56586	0.999956
4930402H24Rik	0.378651	6.81288	3.16728	0.0751277	0.999956
4930412C18Rik	-0.581866	0.701458	0.384701	0.535098	0.999956
4930429B21Rik	-0.953743	0.909061	1.2574	0.262143	0.999956
4930430F08Rik	0.617506	2.9281	2.04988	0.152218	0.999956
4930432K21Rik	-0.893821	2.29743	2.12658	0.144763	0.999956
4930444P10Rik	-0.881328	1.01758	1.43796	0.23047	0.999956
4930447C04Rik	0.0716353	1.76787	0.00504135	0.943396	0.999956
4930447M23Rik	-1.05064	1.98109	1.59126	0.207147	0.999956
4930452B06Rik	-0.686801	4.02941	4.00944	0.0452461	0.999956
4930453N24Rik	-0.288727	3.29443	0.408379	0.522793	0.999956
4930480K23Rik	0.578479	0.955664	0.185147	0.666987	0.999956
4930488L21Rik	-1.12289	0.0691066	0.769192	0.380467	0.999956
4930503L19Rik	-0.438678	2.14929	0.360071	0.548467	0.999956
4930506C21Rik	0.207528	0.225352	0.0279613	0.8672	0.999956
4930507D05Rik	-0.220652	0.167968	0.0515304	0.820421	0.999956
4930520O04Rik	-4.95291	-0.00972628	4.16231	0.0413329	0.999956
4930523C07Rik	-0.665884	1.17354	0.4382	0.507993	0.999956
4930526I15Rik	0.295968	4.24871	0.82451	0.363865	0.999956
4930528A17Rik	0.842126	0.327834	0.593528	0.441058	0.999956
4930538K18Rik	0.0349767	0.942187	0.00184406	0.965747	0.999956
4930539E08Rik	-1.34626	2.84162	3.26686	0.0706929	0.999956
4930539J05Rik	0.930476	1.2486	1.35727	0.244011	0.999956
4930546K05Rik	0.648963	3.22944	1.0018	0.316875	0.999956
4930550C14Rik	1.45313	0.311451	1.54646	0.213658	0.999956
4930563E22Rik	-0.771853	3.46154	3.2259	0.072482	0.999956
4930570G19Rik	-0.780815	3.409	4.02386	0.044861	0.999956
4930578M01Rik	0.309808	2.48184	0.187714	0.664826	0.999956
4930579G24Rik	0.396167	0.622587	0.117117	0.732182	0.999956
4930579K19Rik	-0.108103	1.11622	0.0187007	0.891228	0.999956
4930581F22Rik	-1.28474	0.0877936	0.578849	0.446764	0.999956
4931406C07Rik	-0.0055672	4.4074	0.000284224	0.986549	0.999956
4931406P16Rik	0.28521	4.78022	0.410523	0.521704	0.999956
4931408D14Rik	-0.627818	2.8589	0.21081	0.646133	0.999956
4931414P19Rik	0.0822281	4.10026	0.0518746	0.819833	0.999956
4931428F04Rik	-0.0926867	4.07347	0.0657995	0.797554	0.999956
4931440F15Rik	-0.0187727	1.45521	0.000670932	0.979335	0.999956
4931440P22Rik	0.19893	0.783658	0.0409021	0.839727	0.999956
4932416H05Rik	-0.551107	1.95707	0.828186	0.362798	0.999956
4932438A13Rik	-0.111903	7.65104	0.31266	0.576052	0.999956
4932438H23Rik	-0.665118	1.22518	0.441992	0.506163	0.999956
4932443I19Rik	0.548749	0.910145	0.325406	0.568377	0.999956
4933404O12Rik	-0.267035	4.0854	0.401955	0.526082	0.999956
4933407L21Rik	-0.141782	1.55186	0.0272465	0.868893	0.999956
4933408B17Rik	0.285325	1.71133	0.142493	0.705815	0.999956
4933412E12Rik	-0.990526	1.27203	1.49653	0.221206	0.999956
4933412O06Rik	1.30796	1.58293	2.77269	0.0958846	0.999956
4933417D19Rik	0.0626655	0.3406	0.00243506	0.960643	0.999956
4933421O10Rik	-0.274821	2.5774	0.287455	0.591856	0.999956
4933427D14Rik	0.146002	4.79092	0.292282	0.588762	0.999956
4933427G17Rik	0.0587586	0.129411	0.00331052	0.954117	0.999956
4933429O19Rik	-0.650747	0.323573	0.161992	0.687329	0.999956
4933431E20Rik	-0.0298389	6.43053	0.017556	0.89459	0.999956
4933434E20Rik	-0.101716	6.50822	0.205334	0.650449	0.999956
4933439C10Rik	-0.0826031	3.56376	0.0316866	0.858717	0.999956
5031414D18Rik	0.782336	0.512235	0.632297	0.426514	0.999956
5031425E22Rik	0.239141	4.71591	0.495215	0.48161	0.999956
5031426D15Rik	-0.249432	9.24332	0.701566	0.402258	0.999956
5031434O11Rik	0.368043	3.61044	0.933538	0.333945	0.999956
5031439G07Rik	-0.0836209	5.96426	0.122892	0.725919	0.999956
5330413P13Rik	-1.11255	0.339155	1.01589	0.313495	0.999956
5330417C22Rik	-0.864825	2.91713	2.20406	0.137648	0.999956
5330426P16Rik	0.0352054	0.571691	0.00174851	0.966646	0.999956
5330434G04Rik	-0.299155	3.6201	0.350365	0.553906	0.999956
5430402O13Rik	0.779157	0.919071	0.789374	0.374289	0.999956
5430405H02Rik	-2.06226	1.75134	6.18762	0.0128647	0.999956
5430416N02Rik	-0.122385	3.64014	0.0798436	0.777509	0.999956
5530601H04Rik	-0.104334	2.40912	0.0430493	0.835632	0.999956
5730405O15Rik	1.03171	0.581286	1.11805	0.290339	0.999956
5730408K05Rik	0.570869	3.17563	1.45264	0.228105	0.999956
5730409E04Rik	0.0362906	8.02199	0.0273074	0.868748	0.999956
5730455P16Rik	0.225189	5.46355	0.804352	0.369795	0.999956
5730480H06Rik	-0.129818	0.602138	0.0162492	0.898567	0.999956
5730508B09Rik	-0.711467	2.54142	2.45968	0.116802	0.999956
5730522E02Rik	4.69045	-0.240483	4.64623	0.0311219	0.999956
5730559C18Rik	0.0589077	1.13972	0.00443122	0.946926	0.999956
5830416P10Rik	-0.112594	0.456239	0.010947	0.916671	0.999956
5830417I10Rik	0.215301	5.03335	0.478261	0.489211	0.999956
5830454E08Rik	-0.805421	1.13696	1.03577	0.308808	0.999956
5930403L14Rik	0.286866	5.84402	1.30739	0.252867	0.999956
5930412G12Rik	-1.84942	0.787611	2.71556	0.0993743	0.999956
5930430L01Rik	-0.432642	1.2996	0.208574	0.647887	0.999956
6030419C18Rik	-0.340757	6.78432	0.902832	0.342023	0.999956
6030458C11Rik	0.0635074	5.35239	0.0548561	0.814819	0.999956
6230400D17Rik	0.130946	1.30106	0.0346273	0.852379	0.999956
6330403A02Rik	-0.150388	7.45192	0.169084	0.680927	0.999956
6330403K07Rik	0.259251	7.29182	1.18418	0.276506	0.999956
6330407A03Rik	0.120666	1.73834	0.0395913	0.842282	0.999956
6330408A02Rik	-0.132978	4.31361	0.143568	0.70476	0.999956
6330409D20Rik	0.875359	0.75301	0.59838	0.439197	0.999956
6330415B21Rik	0.249335	5.73804	0.90035	0.342688	0.999956
6330415G19Rik	-0.492241	1.25066	0.269626	0.603583	0.999956
6330416G13Rik	0.236375	2.89662	0.150998	0.697583	0.999956
6330418K02Rik	-0.0684507	3.34317	0.0311121	0.85999	0.999956
6330549D23Rik	0.241191	0.961284	0.0498613	0.823305	0.999956
6430411K18Rik	-1.31862	1.56813	2.33156	0.126775	0.999956
6430503K07Rik	0.76498	0.144455	0.251355	0.616123	0.999956
6430548M08Rik	-0.314277	7.26721	1.46616	0.225952	0.999956
6430571L13Rik	0.0250096	2.52392	0.00174285	0.9667	0.999956
6430584L05Rik	0.211835	0.389524	0.0390624	0.843325	0.999956
6530402F18Rik	-0.345615	0.571666	0.0923702	0.761185	0.999956
6530403H02Rik	0.560269	1.23138	0.474388	0.490975	0.999956
6720489N17Rik	0.0607647	1.9852	0.00707172	0.932982	0.999956
6820408C15Rik	0.82992	1.49946	1.2195	0.269458	0.999956
6820431F20Rik	-0.920312	1.39008	1.41	0.235056	0.999956
8430408G22Rik	1.10231	1.37061	0.876071	0.34928	0.999956
8430419L09Rik	0.150487	6.13695	0.365747	0.545332	0.999956
8430426J06Rik	2.03243	0.376589	2.66816	0.102374	0.999956
8430429K09Rik	-0.443528	3.34152	0.643255	0.422534	0.999956
8430431K14Rik	1.42396	1.52158	2.82754	0.0926602	0.999956
9030612E09Rik	-0.0606524	2.16309	0.00907182	0.924119	0.999956
9030617O03Rik	-0.532285	2.16912	0.939167	0.332492	0.999956
9030624J02Rik	-0.118589	3.95133	0.14284	0.705474	0.999956
9130011E15Rik	1.45982	0.795543	2.46013	0.116769	0.999956
9130019O22Rik	-0.159858	1.53126	0.055035	0.814523	0.999956
9130023H24Rik	-0.390785	1.83246	0.409635	0.522155	0.999956
9130024F11Rik	-0.774229	3.23236	0.81848	0.365625	0.999956
9130221H12Rik	0.484702	2.4245	1.13428	0.286865	0.999956
9130401M01Rik	-0.222042	5.49362	0.743426	0.388566	0.999956
9230110C19Rik	1.19554	0.937479	2.43774	0.118447	0.999956
9230114K14Rik	0.640127	2.58633	1.72365	0.189224	0.999956
9330020H09Rik	-0.866664	1.66691	0.858728	0.354095	0.999956
9330102E08Rik	0.457573	4.60248	1.2611	0.261444	0.999956
9330133O14Rik	-0.500576	4.17027	1.42139	0.233175	0.999956
9330136K24Rik	0.567071	1.00785	0.393608	0.530409	0.999956
9330151L19Rik	-0.0141472	3.76075	0.00144143	0.969715	0.999956
9330159F19Rik	0.187084	7.38951	0.78523	0.375546	0.999956
9330159M07Rik	-1.72526	0.960244	1.91554	0.16635	0.999956
9330162012Rik	-1.51877	1.08099	2.11729	0.145644	0.999956
9330179D12Rik	-0.072288	1.44947	0.00753574	0.930824	0.999956
9330182L06Rik	-0.36147	4.42292	0.808914	0.368441	0.999956
9430015G10Rik	-0.1494	3.46745	0.132407	0.715949	0.999956
9430016H08Rik	0.0170308	3.22971	0.000933887	0.975621	0.999956
9430020K01Rik	0.608645	6.35302	4.90035	0.0268512	0.999956
9430021M05Rik	-0.693569	2.35826	0.638174	0.424373	0.999956
9430038I01Rik	-0.583815	2.34406	0.850129	0.356516	0.999956
9430060I03Rik	-0.992629	1.12549	1.14818	0.28393	0.999956
9430065F17Rik	-0.717454	0.950495	0.768681	0.380626	0.999956
9430083A17Rik	-0.429767	3.87116	1.17871	0.277618	0.999956
9430091E24Rik	-0.313431	1.343	0.143371	0.704952	0.999956
9530051G07Rik	0.22705	1.8355	0.108834	0.741475	0.999956
9530052E02Rik	-1.99085	1.05171	3.92465	0.047583	0.999956
9530059O14Rik	0.771733	3.00794	1.53628	0.215173	0.999956
9530062K07Rik	0.212889	2.3942	0.160676	0.688535	0.999956
9530068E07Rik	-0.458676	5.58713	2.29987	0.129385	0.999956
9530077C05Rik	0.167348	2.12592	0.0538302	0.816528	0.999956
9530080O11Rik	1.25644	1.68057	3.11217	0.0777093	0.999956
9530091C08Rik	0.642183	6.56206	4.87136	0.027306	0.999956
9630013A20Rik	0.588285	1.73143	0.384406	0.535254	0.999956
9830147E19Rik	0.34451	1.37878	0.23481	0.62798	0.999956
9830166K06Rik	0.19145	1.16263	0.063818	0.80056	0.999956
9930012K11Rik	-0.896293	0.754737	0.695612	0.404262	0.999956
9930014A18Rik	-0.0778252	0.715131	0.00558992	0.940401	0.999956
9930021J03Rik	0.0314509	7.38694	0.0274197	0.86848	0.999956
9930104L06Rik	0.598736	3.27384	1.97728	0.159677	0.999956
A130010J15Rik	0.27858	4.14259	0.500872	0.479117	0.999956
A230009B12Rik	1.92399	1.07005	4.68933	0.0303505	0.999956
A230046K03Rik	0.343017	5.53038	1.18538	0.276263	0.999956
A230050P20Rik	-0.021964	4.48212	0.00467008	0.945517	0.999956
A230056J06Rik	0.406718	1.05002	0.225885	0.634592	0.999956
A230057D06Rik	-0.909828	2.00458	1.70869	0.191155	0.999956
A230070E04Rik	0.47055	4.82207	1.52639	0.216656	0.999956
A230072C01Rik	-0.0501067	4.35321	0.0157369	0.90017	0.999956
A230077H06Rik	-0.48053	3.05465	0.759857	0.383373	0.999956
A2m	1.27641	1.90492	1.17613	0.278145	0.999956
A330009N23Rik	-0.322019	2.70782	0.284658	0.593665	0.999956
A330015K06Rik	1.53051	0.436387	1.50448	0.219984	0.999956
A330023F24Rik	0.331591	7.64187	0.935032	0.333559	0.999956
A330040F15Rik	0.868901	0.488355	0.650116	0.420071	0.999956
A330041J22Rik	-1.36941	1.48805	3.9372	0.0472293	0.999956
A330048O09Rik	-0.0434407	1.90635	0.00535481	0.941666	0.999956
A330050F15Rik	-0.0815918	4.53559	0.0768035	0.781677	0.999956
A330069E16Rik	0.37239	1.68991	0.287855	0.591599	0.999956
A330070K13Rik	1.50138	0.392707	1.43664	0.230684	0.999956
A330076C08Rik	0.879488	1.18312	1.46112	0.226752	0.999956
A330076H08Rik	-0.339411	2.94633	0.484831	0.486242	0.999956
A330102I10Rik	-0.0316811	3.51103	0.00411983	0.948822	0.999956
A430005L14Rik	-0.428378	4.5914	1.58509	0.208029	0.999956
A430033K04Rik	-0.0431538	2.42593	0.00593746	0.93858	0.999956
A430035B10Rik	-0.806036	1.837	1.34135	0.246797	0.999956
A430046D13Rik	-0.790569	4.51232	5.70814	0.0168864	0.999956
A430105I19Rik	0.392106	2.38522	0.51492	0.473017	0.999956
A4galt	-0.806615	0.180091	0.374277	0.540682	0.999956
A530058N18Rik	-0.366067	3.14706	0.711462	0.398959	0.999956
A530072M11Rik	-1.40288	-0.0104303	1.10223	0.293778	0.999956
A630023P12Rik	0.769625	0.985051	0.431914	0.511051	0.999956
A630072M18Rik	1.04825	2.89297	4.2531	0.0391788	0.999956
A630089N07Rik	0.58177	1.73512	0.708951	0.399792	0.999956
A730017C20Rik	-0.266741	5.85597	1.22869	0.267661	0.999956
A730017L22Rik	-0.00062084	3.07544	7.81958e-07	0.999294	0.999956
A730020E08Rik	-0.616511	2.26812	0.937299	0.332973	0.999956
A730020M07Rik	0.0622714	0.220356	0.00232965	0.961504	0.999956
A730056A06Rik	0.712033	0.714605	0.5117	0.474404	0.999956
A830010M20Rik	-0.134231	5.79808	0.150401	0.698152	0.999956
A830011K09Rik	-1.3165	0.40722	0.997363	0.317949	0.999956
A830018L16Rik	-0.296242	5.95548	1.75906	0.184742	0.999956
A830019L24Rik	1.23551	0.816673	1.86561	0.171979	0.999956
A830052D11Rik	0.400105	0.486871	0.120806	0.728162	0.999956
A830080D01Rik	0.612457	3.88456	2.93093	0.0868973	0.999956
A830082K12Rik	-0.982884	3.11708	3.3681	0.0664705	0.999956
A830082N09Rik	0.0563425	5.30393	0.0480371	0.826515	0.999956
A930003A15Rik	-0.636157	0.870188	0.349635	0.55432	0.999956
A930004D18Rik	0.116522	1.6389	0.0304579	0.861455	0.999956
A930005H10Rik	-0.62353	3.33411	2.52063	0.112366	0.999956
A930006K02Rik	0.00227365	0.107754	1.37331e-06	0.999065	0.999956
A930009A15Rik	0.243165	0.784682	0.0609973	0.804927	0.999956
A930012L18Rik	0.116487	1.09107	0.0163563	0.898235	0.999956
A930013F10Rik	0.239998	6.3451	1.01041	0.314805	0.999956
A930015D03Rik	1.05272	0.113083	0.786494	0.375162	0.999956
A930017M01Rik	0.157469	3.19072	0.16613	0.683574	0.999956
A930024E05Rik	-0.586283	2.37575	1.21689	0.269972	0.999956
AA387883	2.20075	0.828699	5.05464	0.02456	0.999956
AA388235	0.0267238	2.83972	0.00192146	0.965036	0.999956
AA414768	-0.183302	4.69737	0.355743	0.55088	0.999956
AA415398	0.324942	4.31002	0.855178	0.355092	0.999956
AA467197	2.02818	0.590153	3.51949	0.060651	0.999956
AA986860	-0.393283	1.34009	0.164852	0.684728	0.999956
AF251705	0.340635	1.31828	0.17876	0.672441	0.999956
AF357355	0.684323	1.87675	0.795867	0.372332	0.999956
AF357425	0.42099	0.762269	0.0992642	0.752714	0.999956
AF529169	-0.879559	1.02566	0.772353	0.37949	0.999956
AI115009	-1.40418	3.11892	5.37897	0.0203809	0.999956
AI182371	1.49721	0.238753	1.13396	0.286932	0.999956
AI314180	0.158019	5.40082	0.294495	0.587355	0.999956
AI413582	-0.0840772	5.328	0.0540297	0.816194	0.999956
AI414108	-0.386397	4.90465	0.431442	0.511282	0.999956
AI429214	-0.327564	0.908202	0.145195	0.70317	0.999956
AI464131	0.471507	3.80415	1.72202	0.189433	0.999956
AI467606	0.758585	1.04129	0.832822	0.361458	0.999956
AI504432	-0.710424	4.94648	4.40738	0.0357838	0.999956
AI593442	-0.136094	8.14604	0.290656	0.589801	0.999956
AI597479	0.206524	4.6749	0.447386	0.503579	0.999956
AI607873	-0.954964	0.660297	0.920063	0.337458	0.999956
AI662270	-0.0991404	0.833211	0.00683237	0.934123	0.999956
AI837181	-0.0371737	5.41559	0.0185125	0.891773	0.999956
AI839979	-0.66716	0.357987	0.335698	0.562323	0.999956
AI846148	0.0932024	3.66874	0.0458813	0.830392	0.999956
AI854517	-0.61053	5.36123	3.41506	0.0646041	0.999956
AI854703	-0.101667	3.85469	0.0808937	0.77609	0.999956
AI987944	0.493202	5.15241	3.00369	0.0830753	0.999956
AK010878	0.19409	5.63866	0.501179	0.478983	0.999956
AU019823	0.14506	4.92063	0.152519	0.69614	0.999956
AU021092	0.542226	1.3189	0.56458	0.452421	0.999956
AU022252	0.573561	2.5904	1.00457	0.316207	0.999956
AU023762	-1.20738	1.89454	2.66814	0.102375	0.999956
AU040320	-0.277385	5.25955	1.16166	0.281122	0.999956
AU041133	1.04676	1.72227	3.2557	0.0711754	0.999956
AW011738	-0.49489	1.05131	0.243805	0.621471	0.999956
AW046200	0.211347	0.93181	0.0559233	0.813059	0.999956
AW112010	-1.07937	0.942871	1.43731	0.230575	0.999956
AW146154	0.45556	4.08293	2.10272	0.147038	0.999956
AW209491	-0.368644	4.61221	1.47304	0.224866	0.999956
AW495222	0.0653945	1.01733	0.004063	0.949176	0.999956
AW549542	0.519273	0.129168	0.162956	0.686449	0.999956
AW549877	0.0908715	5.65231	0.0820261	0.77457	0.999956
AW551984	-0.796333	2.40243	1.38898	0.238577	0.999956
AW554918	0.0419461	4.17769	0.0172717	0.895441	0.999956
AW822252	-0.912254	1.04443	1.00366	0.316426	0.999956
Aaas	-0.700386	2.89728	1.86022	0.172599	0.999956
Aacs	-0.558053	5.08811	3.73575	0.0532599	0.999956
Aagab	0.0226259	6.97159	0.0118299	0.913389	0.999956
Aak1	-0.0871903	8.8331	0.217615	0.640863	0.999956
Aamdc	0.238214	6.68812	1.20233	0.272856	0.999956
Aamp	-0.0438524	8.52706	0.0424968	0.836676	0.999956
Aar2	-0.455637	3.79756	1.41379	0.234429	0.999956
Aard	0.204173	2.19848	0.0926252	0.760866	0.999956
Aars	-0.00956838	5.34582	0.00109989	0.973543	0.999956
Aars2	0.472403	2.87373	1.18132	0.277087	0.999956
Aarsd1	-0.0502394	5.39146	0.032447	0.85705	0.999956
Aasdh	0.151879	4.18249	0.182321	0.669386	0.999956
Aasdhppt	0.274697	4.81762	0.932856	0.334122	0.999956
Aass	0.360943	2.17601	0.424867	0.514519	0.999956
Aatf	-0.94201	0.798653	1.02314	0.311774	0.999956
Aatk	-0.0228777	9.90241	0.00787213	0.9293	0.999956
Abat	0.136479	6.69948	0.231195	0.630639	0.999956
Abca1	0.0251133	4.65801	0.00303214	0.956087	0.999956
Abca2	-0.392553	5.96547	1.69236	0.19329	0.999956
Abca3	-0.019256	4.58874	0.00303262	0.956083	0.999956
Abca4	-0.0480073	1.77008	0.00188623	0.965358	0.999956
Abca5	0.049027	5.39364	0.0477429	0.827038	0.999956
Abca7	0.387273	2.24256	0.334087	0.563263	0.999956
Abca8a	0.312549	4.49863	0.452823	0.500997	0.999956
Abca8b	0.323955	1.56777	0.265133	0.606615	0.999956
Abca9	-0.16887	0.696495	0.0171424	0.895831	0.999956
Abcb10	-0.25066	4.47746	0.753635	0.385328	0.999956
Abcb1a	0.663051	5.79975	6.04694	0.0139304	0.999956
Abcb1b	-0.118826	1.80027	0.0247707	0.87494	0.999956
Abcb4	-0.319625	2.79986	0.242353	0.622512	0.999956
Abcb6	-0.478932	3.83006	1.27908	0.258069	0.999956
Abcb7	0.251184	4.85992	0.659235	0.41683	0.999956
Abcb8	-0.0773333	3.89689	0.0540896	0.816094	0.999956
Abcb9	-0.124674	5.05317	0.116531	0.732827	0.999956
Abcc1	0.16142	3.53469	0.145943	0.702443	0.999956
Abcc10	-1.50905	1.12537	3.15266	0.0758034	0.999956
Abcc4	0.513882	4.31152	1.97799	0.159602	0.999956
Abcc5	-0.159623	6.88857	0.499279	0.479817	0.999956
Abcc8	0.033339	2.91934	0.00267021	0.958788	0.999956
Abcc9	0.67258	2.91666	1.91953	0.165909	0.999956
Abcd1	-1.52652	0.876608	2.36189	0.124331	0.999956
Abcd2	0.15749	4.06337	0.195288	0.658551	0.999956
Abcd3	0.0395737	6.41807	0.0237955	0.877406	0.999956
Abcd4	-0.975537	3.40383	3.72416	0.0536307	0.999956
Abce1	0.0304734	5.33954	0.00946822	0.922484	0.999956
Abcf1	0.193282	5.21225	0.601339	0.438067	0.999956
Abcf2	0.156882	3.69824	0.202853	0.652428	0.999956
Abcf3	-0.351992	4.68808	1.39965	0.236783	0.999956
Abcg1	-0.112839	5.29778	0.0987077	0.753386	0.999956
Abcg2	0.171623	3.7896	0.209763	0.646953	0.999956
Abcg4	-0.442188	5.62169	3.39837	0.065261	0.999956
Abhd1	0.656801	0.978491	0.624737	0.429292	0.999956
Abhd10	-0.0471686	3.74156	0.0198886	0.887849	0.999956
Abhd11	-0.263276	4.24261	0.554578	0.456453	0.999956
Abhd11os	-0.00767863	1.58258	8.05676e-05	0.992838	0.999956
Abhd12	-0.171827	7.07137	0.741948	0.389038	0.999956
Abhd13	-0.024233	5.5531	0.0114545	0.914769	0.999956
Abhd14a	0.327006	3.56581	0.356791	0.550294	0.999956
Abhd14b	0.369962	3.35857	0.50201	0.478618	0.999956
Abhd15	-0.146163	0.152629	0.0120846	0.912465	0.999956
Abhd16a	-0.0199171	6.22784	0.00962998	0.921827	0.999956
Abhd17a	-0.464371	4.9482	2.16374	0.1413	0.999956
Abhd17b	0.269995	6.52045	1.79572	0.180231	0.999956
Abhd17c	0.461019	6.47341	3.75276	0.0527203	0.999956
Abhd2	-0.450013	0.901585	0.260572	0.609727	0.999956
Abhd3	0.275681	6.4665	0.939104	0.332508	0.999956
Abhd4	0.425513	5.28159	1.78297	0.181785	0.999956
Abhd5	0.278623	4.75924	1.04312	0.307097	0.999956
Abhd6	0.268636	4.79259	0.684122	0.408171	0.999956
Abhd8	-0.10437	6.51474	0.21607	0.642051	0.999956
Abi1	0.0180089	8.10017	0.00342254	0.953348	0.999956
Abi2	-0.185553	8.70818	0.793116	0.37316	0.999956
Abi3	-0.387956	2.47284	0.636928	0.424826	0.999956
Abi3bp	-1.81673	0.608583	1.80569	0.179026	0.999956
Abl1	-0.316971	4.40498	0.719277	0.396381	0.999956
Abl2	0.0459033	6.99127	0.0431273	0.835486	0.999956
Ablim1	0.246501	5.29086	0.960414	0.327083	0.999956
Ablim2	-0.138804	5.89577	0.229662	0.631774	0.999956
Ablim3	0.389586	4.03512	1.25623	0.262366	0.999956
Abr	0.0163565	8.51671	0.00607883	0.937854	0.999956
Abracl	0.20792	4.43349	0.134841	0.713464	0.999956
Abt1	-0.200137	4.64977	0.453684	0.500591	0.999956
Abtb1	-0.0578703	3.58288	0.023762	0.877492	0.999956
Abtb2	-0.534302	3.61783	2.28292	0.130806	0.999956
Acaa1a	0.00948544	4.9303	0.000908813	0.97595	0.999956
Acaa2	0.106724	4.35022	0.0693317	0.792312	0.999956
Acaca	0.0903257	4.98526	0.0857405	0.769664	0.999956
Acacb	0.812088	1.51737	1.32178	0.250274	0.999956
Acad10	-0.604356	0.612901	0.334301	0.563137	0.999956
Acad11	0.569099	4.56212	3.74347	0.0530142	0.999956
Acad8	0.64051	5.26022	4.83122	0.0279489	0.999956
Acad9	-0.0351329	4.28971	0.0115647	0.914361	0.999956
Acadl	0.621458	5.66506	5.63186	0.0176369	0.999956
Acadm	0.38867	5.06655	1.0094	0.315046	0.999956
Acads	0.356018	4.3699	1.44962	0.228589	0.999956
Acadsb	0.192776	5.40892	0.396789	0.528752	0.999956
Acadvl	0.0148885	3.79979	0.00121271	0.97222	0.999956
Acan	0.288974	1.31699	0.115096	0.734416	0.999956
Acap2	0.186952	6.17194	0.162889	0.68651	0.999956
Acap3	-0.6386	4.40585	3.8756	0.0489929	0.999956
Acat1	0.00998435	6.17985	0.000505496	0.982062	0.999956
Acat2	-0.317564	5.34635	1.16837	0.279737	0.999956
Acat3	0.245192	1.96171	0.145445	0.702927	0.999956
Acbd3	0.220288	6.63702	1.04802	0.305964	0.999956
Acbd4	-0.427636	4.93354	2.23963	0.134513	0.999956
Acbd5	0.0229275	6.45164	0.00989327	0.920769	0.999956
Acbd6	-0.0112701	4.61363	0.00116301	0.972795	0.999956
Acbd7	-1.20398	0.584959	1.74317	0.186738	0.999956
Accs	-0.499903	0.905895	0.307783	0.579044	0.999956
Acd	-0.181028	5.67732	0.380591	0.537287	0.999956
Ace	-0.141601	3.1499	0.0227012	0.880237	0.999956
Acer2	0.191497	2.95742	0.13523	0.71307	0.999956
Acer3	-0.0169231	3.62084	0.0012512	0.971783	0.999956
Ache	0.0285967	3.75586	0.00748214	0.931069	0.999956
Acin1	0.184592	6.5632	0.53629	0.463975	0.999956
Ackr1	-0.587253	4.93187	5.21192	0.0224326	0.999956
Ackr2	0.0557079	0.130144	0.00193307	0.964931	0.999956
Ackr3	0.381333	4.23168	1.5069	0.219613	0.999956
Acly	0.104246	5.84773	0.209198	0.647397	0.999956
Aco1	0.136556	3.71004	0.112391	0.737438	0.999956
Aco2	-0.0925572	7.64377	0.218209	0.640408	0.999956
Acot1	0.62603	4.20826	3.03362	0.0815559	0.999956
Acot11	0.198102	4.03691	0.410509	0.521711	0.999956
Acot13	-0.0181201	6.35244	0.00541907	0.941317	0.999956
Acot2	0.212645	4.71652	0.376087	0.539705	0.999956
Acot4	-1.31204	1.05109	1.75937	0.184703	0.999956
Acot5	0.224664	3.23854	0.260469	0.609798	0.999956
Acot7	-0.137771	7.25774	0.377204	0.539103	0.999956
Acot8	-0.147447	4.07409	0.186845	0.665556	0.999956
Acot9	-0.611315	2.91652	1.69922	0.19239	0.999956
Acox1	0.15325	6.61645	0.570306	0.450137	0.999956
Acox3	-0.482876	5.63628	2.30894	0.128632	0.999956
Acp1	0.0223935	7.28544	0.0126983	0.910279	0.999956
Acp2	0.100573	6.49134	0.261247	0.609265	0.999956
Acp6	-0.341592	3.03215	0.39483	0.529771	0.999956
Acr	-0.927862	0.627443	0.795184	0.372537	0.999956
Acrbp	0.524169	2.39519	0.763486	0.38224	0.999956
Acsbg1	0.293965	4.75077	1.08773	0.296975	0.999956
Acsf2	-2.69869	0.128509	4.05656	0.0440001	0.999956
Acsf3	0.543061	1.2637	0.399381	0.527409	0.999956
Acsl1	-0.214103	5.67627	0.708529	0.399932	0.999956
Acsl3	0.28742	9.09894	1.04917	0.305698	0.999956
Acsl4	-0.120671	7.73885	0.351503	0.553264	0.999956
Acsl5	0.0634795	5.2973	0.0342597	0.853156	0.999956
Acsl6	0.197741	4.94253	0.208331	0.648079	0.999956
Acss1	0.23362	6.59981	0.840565	0.359235	0.999956
Acss2	0.433146	4.26258	2.08039	0.149202	0.999956
Acta1	-0.430881	2.55967	0.339842	0.55992	0.999956
Acta2	0.0829403	3.37932	0.0165991	0.897486	0.999956
Actb	0.0186762	10.7045	0.00447906	0.946641	0.999956
Actg1	-0.20686	3.43957	0.274093	0.600599	0.999956
Actl6a	0.0379245	5.03846	0.0228275	0.879907	0.999956
Actl6b	-0.367034	5.73179	1.69316	0.193185	0.999956
Actn1	0.149288	6.62416	0.374555	0.540532	0.999956
Actn2	-0.149845	1.53307	0.0304994	0.861362	0.999956
Actn4	0.0530641	6.54099	0.0569586	0.811369	0.999956
Actr10	-0.0639023	7.56345	0.10015	0.75165	0.999956
Actr1a	-0.122149	5.38406	0.233696	0.628797	0.999956
Actr1b	-0.400313	5.50631	2.47853	0.11541	0.999956
Actr2	-0.165906	8.42926	0.283629	0.594333	0.999956
Actr3	-0.203272	7.75151	0.656063	0.417953	0.999956
Actr3b	0.199727	2.32362	0.0840229	0.771918	0.999956
Actr5	-0.692571	1.93259	1.18413	0.276517	0.999956
Actr6	-0.0359962	4.11025	0.00448567	0.946601	0.999956
Actr8	-0.258395	5.964	1.24993	0.263565	0.999956
Actrt3	-0.751928	0.932908	0.763846	0.382128	0.999956
Acvr1	0.0152559	4.53814	0.000563778	0.981057	0.999956
Acvr1b	-0.272731	0.642752	0.0889686	0.765493	0.999956
Acvr1c	-0.319708	4.56385	0.737055	0.390606	0.999956
Acvr2a	-0.0277107	5.09838	0.00544101	0.941199	0.999956
Acvr2b	-0.300316	2.53977	0.287015	0.59214	0.999956
Acvrl1	0.786299	2.30429	1.23735	0.265983	0.999956
Acy1	-0.444126	3.33379	0.827488	0.363	0.999956
Acy3	-0.516615	0.756261	0.245387	0.620342	0.999956
Acyp1	-0.196052	5.08962	0.479564	0.48862	0.999956
Acyp2	0.0802599	4.08389	0.0168464	0.89673	0.999956
Adal	-0.963366	2.45959	3.71165	0.0540341	0.999956
Adam10	-0.0957016	5.7144	0.101792	0.749689	0.999956
Adam11	-0.044983	6.86865	0.0360914	0.849327	0.999956
Adam12	0.903948	1.88822	1.86407	0.172156	0.999956
Adam15	0.326165	7.50529	1.78922	0.181022	0.999956
Adam17	0.204872	6.08775	0.732052	0.392219	0.999956
Adam19	-0.418362	3.19402	0.884382	0.347004	0.999956
Adam1a	0.487477	4.31789	2.52875	0.111789	0.999956
Adam22	-0.112505	8.33102	0.195915	0.658038	0.999956
Adam23	-0.128568	5.56099	0.274545	0.600299	0.999956
Adam33	2.45566	0.477291	1.91868	0.166002	0.999956
Adam8	0.131465	3.05917	0.0771205	0.781238	0.999956
Adam9	-0.242716	4.25655	0.124105	0.724624	0.999956
Adamts1	-0.63735	4.89175	2.57394	0.108637	0.999956
Adamts10	0.189353	2.87866	0.112297	0.737544	0.999956
Adamts13	-2.40435	0.0447865	2.14472	0.143061	0.999956
Adamts15	-0.533634	2.58027	0.525756	0.468397	0.999956
Adamts16	-0.341093	2.39955	0.235922	0.627167	0.999956
Adamts17	-0.420132	2.66763	0.693288	0.405048	0.999956
Adamts2	-0.172269	2.81939	0.0729631	0.78707	0.999956
Adamts20	0.409204	3.84755	1.334	0.248094	0.999956
Adamts3	-1.40559	2.3637	4.58952	0.0321681	0.999956
Adamts4	-0.386288	3.35465	0.79471	0.37268	0.999956
Adamts5	-0.26948	1.99071	0.116885	0.732438	0.999956
Adamts8	0.451602	2.48457	0.68903	0.406495	0.999956
Adamts9	-0.156059	0.721792	0.0245515	0.87549	0.999956
Adamtsl1	-0.917359	3.36906	3.29625	0.0694383	0.999956
Adamtsl4	-0.0220363	2.19525	0.00123724	0.971941	0.999956
Adamtsl5	-0.383903	0.653016	0.149508	0.699006	0.999956
Adap1	0.190822	6.14249	0.446388	0.504055	0.999956
Adar	-0.0987579	6.14251	0.13448	0.713832	0.999956
Adarb1	-0.214339	6.77363	0.619032	0.431407	0.999956
Adarb2	-0.424342	4.55901	1.7312	0.188258	0.999956
Adat1	0.561	2.65213	0.814371	0.366831	0.999956
Adat2	0.380825	1.54682	0.302574	0.582273	0.999956
Adck1	-0.00519474	5.72023	0.000395679	0.98413	0.999956
Adck2	-0.161866	4.91779	0.194892	0.658876	0.999956
Adck3	-0.0657732	4.02696	0.0229951	0.87947	0.999956
Adck4	0.188469	3.27495	0.172854	0.677588	0.999956
Adck5	-0.192486	2.54534	0.0913463	0.762473	0.999956
Adcy1	0.0707811	9.34793	0.0597229	0.806934	0.999956
Adcy2	0.0953699	6.09629	0.12024	0.728774	0.999956
Adcy3	0.0301114	4.53253	0.0106694	0.917731	0.999956
Adcy4	0.802713	1.20733	1.09411	0.295562	0.999956
Adcy5	-0.208305	4.15453	0.268321	0.60446	0.999956
Adcy6	-0.00252019	5.76528	8.22072e-05	0.992766	0.999956
Adcy7	-0.837753	2.07337	1.81773	0.177584	0.999956
Adcy8	0.588483	0.515083	0.358952	0.549089	0.999956
Adcy9	-0.0652025	7.46435	0.0875546	0.767309	0.999956
Adcyap1	-1.12758	3.12326	2.13139	0.14431	0.999956
Adcyap1r1	-0.10292	6.85258	0.236356	0.626851	0.999956
Add1	-0.129164	8.14001	0.388743	0.532961	0.999956
Add2	0.138958	9.30467	0.23167	0.630288	0.999956
Add3	0.18807	7.26161	0.414313	0.519789	0.999956
Adgb	0.469072	0.256157	0.181652	0.669957	0.999956
Adgra1	0.286341	5.19252	0.563952	0.452672	0.999956
Adgra2	0.229524	3.12909	0.218598	0.64011	0.999956
Adgra3	-0.110097	1.18138	0.015705	0.90027	0.999956
Adgrb1	0.0862984	7.45164	0.139088	0.70919	0.999956
Adgrb2	-0.256216	5.36863	0.760308	0.383232	0.999956
Adgrb3	-0.00629067	6.03328	0.000325908	0.985597	0.999956
Adgrd1	-0.473903	3.03734	0.364704	0.545905	0.999956
Adgre1	-0.69525	3.2309	1.90629	0.167376	0.999956
Adgre5	-0.562139	2.05353	0.583567	0.444918	0.999956
Adgrf4	0.172227	1.86092	0.106304	0.744391	0.999956
Adgrf5	0.0434978	4.66003	0.0197267	0.888303	0.999956
Adgrg1	-0.327032	6.47139	1.94754	0.162852	0.999956
Adgrg2	-0.582067	1.95908	0.839314	0.359593	0.999956
Adgrg6	-1.59684	0.537962	2.1819	0.139642	0.999956
Adgrl1	-0.0553536	10.3988	0.0669845	0.795779	0.999956
Adgrl2	0.155459	4.57017	0.194618	0.659101	0.999956
Adgrl3	-0.239956	2.50971	0.181987	0.669671	0.999956
Adgrl4	0.693603	4.62825	3.97261	0.046246	0.999956
Adgrv1	2.04853	0.784462	4.53598	0.0331895	0.999956
Adh5	-0.32683	5.20684	1.02093	0.312299	0.999956
Adhfe1	0.819246	4.38526	4.63481	0.0313296	0.999956
Adi1	0.218177	3.63364	0.234757	0.628019	0.999956
Adipor1	-0.0380872	4.73697	0.0135182	0.90744	0.999956
Adipor2	0.469601	6.01978	2.97679	0.0844668	0.999956
Adk	0.131139	5.19806	0.276032	0.599314	0.999956
Adm	0.685328	2.92267	0.777271	0.377977	0.999956
Adnp2	0.947503	0.905478	1.11843	0.290258	0.999956
Ado	0.0575226	6.39236	0.055307	0.814073	0.999956
Adora1	0.15632	8.45351	0.534799	0.464596	0.999956
Adora2a	0.489476	2.15273	0.556664	0.455607	0.999956
Adora2b	-0.44178	1.74748	0.416962	0.518457	0.999956
Adpgk	0.478091	3.36249	1.15327	0.282866	0.999956
Adprh	-0.385796	6.55264	2.76756	0.0961929	0.999956
Adprhl2	-1.03237	0.167534	0.55762	0.455221	0.999956
Adprm	-0.416991	3.71322	1.34253	0.246588	0.999956
Adra1a	-1.61641	0.705819	1.97646	0.159764	0.999956
Adra1b	-0.768212	5.00415	1.8393	0.175033	0.999956
Adra1d	-0.279812	4.68482	0.593597	0.441032	0.999956
Adra2a	0.132048	4.33599	0.0548381	0.814849	0.999956
Adra2b	-1.45694	0.372235	0.765308	0.381673	0.999956
Adra2c	0.134547	4.10381	0.100282	0.751491	0.999956
Adrb1	-0.384384	5.47715	1.11494	0.29101	0.999956
Adrb3	0.813933	0.904812	0.573215	0.448984	0.999956
Adrbk1	-0.150001	7.11489	0.276378	0.599085	0.999956
Adrbk2	0.0716816	7.31238	0.0713652	0.789359	0.999956
Adrm1	0.0629808	3.0993	0.02364	0.877804	0.999956
Adsl	-0.133768	2.85543	0.0788215	0.778901	0.999956
Adss	-0.0218322	5.63603	0.00490598	0.94416	0.999956
Adssl1	-0.214471	2.49917	0.139844	0.708436	0.999956
Aebp1	0.752274	1.88548	0.5235	0.469352	0.999956
Aebp2	-0.161053	6.09417	0.297774	0.585281	0.999956
Aen	0.855711	1.18071	1.06852	0.301279	0.999956
Aes	-0.11973	9.21967	0.299326	0.584305	0.999956
Afap1	0.158804	4.33847	0.24495	0.620654	0.999956
Afap1l1	-0.460071	2.96586	0.861831	0.353227	0.999956
Afap1l2	0.0572383	2.78132	0.00863627	0.925958	0.999956
Aff1	0.123529	2.72983	0.0619082	0.803505	0.999956
Aff3	0.231131	5.59477	0.604306	0.43694	0.999956
Aff4	0.0181599	7.94553	0.00471594	0.94525	0.999956
Afg3l1	0.287829	5.39013	1.09502	0.295362	0.999956
Afg3l2	-0.339421	5.9883	2.05892	0.151317	0.999956
Afmid	-0.573502	2.28609	0.717871	0.396843	0.999956
Aftph	0.286154	7.83978	0.897464	0.343463	0.999956
Aga	0.0449071	3.68085	0.0074691	0.931129	0.999956
Agap1	-0.0348202	7.29524	0.0354053	0.850749	0.999956
Agap2	0.0972677	7.85769	0.223488	0.636395	0.999956
Agap3	0.0646284	8.98545	0.0590691	0.807973	0.999956
Agbl2	0.854144	2.97264	2.84239	0.0918076	0.999956
Agbl3	0.327723	2.48117	0.406006	0.524004	0.999956
Agbl4	0.747187	0.49689	0.249899	0.617146	0.999956
Agbl5	-0.0620259	2.43063	0.0118181	0.913432	0.999956
Agfg1	0.107974	4.78957	0.115053	0.734464	0.999956
Agfg2	-0.101872	5.46986	0.0924161	0.761128	0.999956
Aggf1	-0.0109241	5.89229	0.00244096	0.960596	0.999956
Agk	-0.0741016	3.61291	0.0343806	0.8529	0.999956
Agl	0.0643838	4.84577	0.0442953	0.833305	0.999956
Agmo	0.668992	0.0934401	0.306029	0.580127	0.999956
Ago1	0.188086	5.13715	0.553454	0.45691	0.999956
Ago2	0.717455	2.58923	1.55743	0.212041	0.999956
Ago3	0.748073	1.31048	0.745939	0.387765	0.999956
Ago4	0.15028	4.66396	0.234144	0.628468	0.999956
Agpat1	0.118335	7.55821	0.261095	0.609369	0.999956
Agpat3	-0.04453	5.4787	0.024839	0.874769	0.999956
Agpat4	0.06532	6.76441	0.08189	0.774752	0.999956
Agpat5	0.150324	5.45493	0.346609	0.556039	0.999956
Agpat6	0.0335793	6.76795	0.0120033	0.912759	0.999956
Agpat9	-0.346544	1.6595	0.240345	0.623957	0.999956
Agps	0.156482	4.95916	0.212429	0.64487	0.999956
Agrn	-0.15309	6.5184	0.490442	0.48373	0.999956
Agt	-0.944457	3.64162	1.96637	0.160834	0.999956
Agtpbp1	0.0611609	8.16784	0.0760309	0.78275	0.999956
Agtrap	0.799007	3.54499	5.0561	0.0245394	0.999956
Ahctf1	0.0574093	4.36727	0.0220551	0.881941	0.999956
Ahcy	0.298952	3.78427	0.603812	0.437127	0.999956
Ahcyl1	0.0641299	7.55692	0.0918113	0.761887	0.999956
Ahcyl2	-0.00532201	6.64457	0.000292115	0.986364	0.999956
Ahdc1	-0.288081	5.54002	1.23972	0.265524	0.999956
Ahi1	0.0466738	7.55633	0.046134	0.829932	0.999956
Ahnak	0.394442	4.51807	0.629887	0.427397	0.999956
Ahr	-0.149375	3.09503	0.145687	0.702692	0.999956
Ahrr	1.39296	0.680568	2.15504	0.142103	0.999956
Ahsa1	-0.0596269	6.47821	0.0474531	0.827556	0.999956
Ahsa2	-0.265161	5.18405	1.01535	0.313626	0.999956
Aida	0.0615786	4.47673	0.0378642	0.845716	0.999956
Aif1	-0.443075	3.64848	1.31022	0.252356	0.999956
Aif1l	-0.391956	4.49106	1.66507	0.19692	0.999956
Aifm1	0.12711	3.84897	0.114988	0.734535	0.999956
Aifm2	-0.18362	2.5599	0.135626	0.712668	0.999956
Aifm3	0.505104	3.97521	1.79573	0.180229	0.999956
Aig1	1.7066	1.48439	4.84049	0.0277989	0.999956
Aim1	-0.364927	1.117	0.129374	0.719082	0.999956
Aim1l	-1.5845	0.233451	1.03437	0.309135	0.999956
Aim2	-0.0123918	3.99918	0.000843442	0.976831	0.999956
Aimp1	-0.026635	6.09616	0.015913	0.899616	0.999956
Aimp2	-0.195665	4.91274	0.448341	0.503124	0.999956
Aip	0.201028	4.35124	0.466881	0.494426	0.999956
Airn	-0.307371	0.516435	0.0985153	0.753619	0.999956
Ajap1	-0.140317	6.1008	0.305888	0.580214	0.999956
Ajuba	0.0284681	0.481695	0.000421511	0.98362	0.999956
Ak1	-0.18079	5.57142	0.419574	0.51715	0.999956
Ak2	0.0726031	4.94654	0.0695139	0.792046	0.999956
Ak3	0.560766	5.72322	4.82079	0.0281184	0.999956
Ak4	0.0466392	6.88059	0.023403	0.878414	0.999956
Ak5	-0.0285626	4.33735	0.00456665	0.946122	0.999956
Ak6	0.485546	3.08137	1.31306	0.251842	0.999956
Ak8	1.04656	1.0416	1.627	0.202119	0.999956
Akap1	-0.220694	4.97052	0.473553	0.491357	0.999956
Akap10	-0.188757	3.40512	0.193018	0.660416	0.999956
Akap11	-0.46133	8.52992	3.50324	0.0612489	0.999956
Akap12	-0.495405	5.51568	1.72551	0.188985	0.999956
Akap13	-0.0459016	5.72007	0.0112509	0.915527	0.999956
Akap17b	0.231602	6.09927	0.939731	0.332347	0.999956
Akap5	-0.096107	5.8001	0.126403	0.722192	0.999956
Akap6	-0.0750841	7.03527	0.134303	0.714012	0.999956
Akap7	-0.0106884	5.41437	0.00163018	0.967794	0.999956
Akap8	0.0935109	7.17127	0.163185	0.686241	0.999956
Akap8l	0.492203	5.06874	3.73029	0.053434	0.999956
Akap9	0.534953	6.31073	5.97979	0.0144707	0.999956
Akip1	0.880616	1.94203	1.35421	0.244544	0.999956
Akirin1	0.276954	5.80059	1.32594	0.249528	0.999956
Akirin2	-0.11791	7.4541	0.1364	0.711887	0.999956
Akna	0.449002	3.51998	1.07958	0.298791	0.999956
Akr1a1	-0.22423	9.03517	1.11744	0.29047	0.999956
Akr1b10	0.614448	2.95572	1.28839	0.256345	0.999956
Akr1c14	-0.162887	1.07277	0.0313046	0.859563	0.999956
Akr1c18	-0.90715	1.68798	1.06284	0.302569	0.999956
Akr1e1	-0.000313227	4.75123	1.03542e-06	0.999188	0.999956
Akr7a5	-0.312481	4.25434	0.703432	0.401633	0.999956
Akt1	-0.0920884	6.31876	0.124092	0.724639	0.999956
Akt1s1	-0.312547	2.2452	0.232571	0.629624	0.999956
Akt2	0.355577	6.04984	1.05975	0.303272	0.999956
Akt3	0.332042	5.25377	1.29757	0.254657	0.999956
Aktip	0.0756186	7.23776	0.107232	0.743318	0.999956
Alad	0.456338	3.62172	1.2514	0.263285	0.999956
Alas1	-0.11712	4.30232	0.0827993	0.773539	0.999956
Alcam	0.243943	6.69876	1.26778	0.260184	0.999956
Aldh16a1	0.152894	1.03099	0.0241794	0.876429	0.999956
Aldh18a1	-0.535604	2.23756	0.707197	0.400376	0.999956
Aldh1a1	-0.206152	5.18331	0.451611	0.501571	0.999956
Aldh1a2	-0.226059	1.9941	0.0410349	0.839471	0.999956
Aldh1a3	0.090097	0.20224	0.00547467	0.941018	0.999956
Aldh1b1	-0.369829	4.68373	1.42201	0.233074	0.999956
Aldh1l1	-0.223892	3.12571	0.237082	0.626322	0.999956
Aldh1l2	-0.691834	1.48465	0.642858	0.422678	0.999956
Aldh2	0.343462	6.07301	1.60928	0.204593	0.999956
Aldh3a2	0.00670443	5.09531	0.000462218	0.982847	0.999956
Aldh3b1	0.439241	1.55195	0.408704	0.522628	0.999956
Aldh3b2	-1.32607	0.421894	1.38137	0.239867	0.999956
Aldh4a1	0.0490351	4.20585	0.0179513	0.893416	0.999956
Aldh5a1	0.0881329	6.27507	0.13175	0.716625	0.999956
Aldh6a1	0.402857	6.69416	3.21333	0.0730407	0.999956
Aldh7a1	0.532793	4.07097	2.56993	0.108912	0.999956
Aldh9a1	0.327168	3.79519	0.914691	0.338873	0.999956
Aldoa	0.101927	9.4758	0.130785	0.71762	0.999956
Aldob	-0.0903527	2.61312	0.0235489	0.878038	0.999956
Aldoc	0.0610979	10.5192	0.0677277	0.794674	0.999956
Alg1	-0.216824	5.36286	0.613894	0.433325	0.999956
Alg10b	-0.0946355	1.08297	0.0149563	0.902665	0.999956
Alg11	0.0535967	5.6784	0.0529446	0.818016	0.999956
Alg12	0.175424	3.45698	0.183724	0.668192	0.999956
Alg13	-0.269075	3.13794	0.37824	0.538547	0.999956
Alg14	0.318221	3.15346	0.576183	0.447812	0.999956
Alg2	-0.173471	6.01924	0.55806	0.455043	0.999956
Alg3	0.522791	1.9984	0.653931	0.418711	0.999956
Alg5	0.382722	4.18025	1.09105	0.296238	0.999956
Alg6	-0.335441	3.67069	0.587163	0.443518	0.999956
Alg8	0.234371	5.2793	0.791138	0.373756	0.999956
Alg9	0.0284015	3.633	0.00431894	0.947602	0.999956
Alk	0.0773174	0.222643	0.00574691	0.939572	0.999956
Alkbh1	-0.309935	2.28706	0.299512	0.584189	0.999956
Alkbh2	1.42696	0.95743	3.18323	0.0743976	0.999956
Alkbh3	-0.843507	2.4545	2.14975	0.142593	0.999956
Alkbh4	-0.493569	1.98152	0.48143	0.487775	0.999956
Alkbh5	-0.0152912	5.94608	0.00201704	0.964178	0.999956
Alkbh6	0.171386	2.9212	0.141842	0.706457	0.999956
Alkbh7	-0.350195	4.25875	1.09856	0.294583	0.999956
Alkbh8	0.830143	2.96997	2.61497	0.105859	0.999956
Alms1	0.636102	1.5465	0.463157	0.496152	0.999956
Alox12b	0.178426	1.5552	0.0699094	0.791469	0.999956
Alox5	-1.00036	0.0542862	0.547145	0.459487	0.999956
Alox5ap	-0.0669147	4.4367	0.0471234	0.828147	0.999956
Alox8	-1.11836	1.12664	1.52367	0.217066	0.999956
Aloxe3	0.441049	3.01395	0.594065	0.440851	0.999956
Alpk1	0.480109	1.34269	0.260267	0.609937	0.999956
Alpl	-0.213672	2.2765	0.115008	0.734513	0.999956
Als2	0.173081	1.26852	0.0485484	0.825609	0.999956
Als2cl	-0.806355	2.42045	1.39038	0.238341	0.999956
Alyref	0.13121	6.34334	0.238554	0.625252	0.999956
Alyref2	-0.139275	3.48609	0.123902	0.72484	0.999956
Amacr	0.260471	3.27162	0.383104	0.535947	0.999956
Ambra1	0.0906666	5.33788	0.127185	0.721369	0.999956
Amdhd2	-0.679041	3.33814	1.72163	0.189484	0.999956
Amer1	-0.323483	4.1372	0.624678	0.429314	0.999956
Amer2	-0.0346531	5.40537	0.0143227	0.904739	0.999956
Amer3	0.411496	2.98969	0.904341	0.34162	0.999956
Amfr	0.0404052	7.58235	0.0442489	0.833391	0.999956
Amigo1	-0.208605	4.92621	0.323018	0.569799	0.999956
Amigo2	0.0821277	5.08861	0.0258324	0.87231	0.999956
Ammecr1	-0.0389592	2.20468	0.00399637	0.949594	0.999956
Ammecr1l	0.137317	6.17504	0.492421	0.482849	0.999956
Amn	-1.68086	3.10963	3.14446	0.0761851	0.999956
Amn1	-0.514214	3.17516	0.910272	0.340042	0.999956
Amot	0.301358	5.47423	1.0317	0.309761	0.999956
Amotl1	-0.205442	6.22746	0.143991	0.704345	0.999956
Amotl2	-0.213253	4.12775	0.38521	0.534828	0.999956
Ampd2	-0.147742	5.57428	0.348396	0.555023	0.999956
Ampd3	0.494808	2.94665	0.892056	0.344921	0.999956
Amph	-0.153165	8.25443	0.404998	0.524519	0.999956
Amy1	0.09043	4.40556	0.0729873	0.787036	0.999956
Amz1	-0.572161	3.92918	1.67401	0.195722	0.999956
Amz2	0.0251618	4.18978	0.00529144	0.942011	0.999956
Anapc1	-0.289975	4.6622	0.591296	0.441918	0.999956
Anapc10	-0.102072	3.29213	0.0572333	0.810924	0.999956
Anapc11	0.148673	6.9537	0.325705	0.568199	0.999956
Anapc13	-0.121759	5.4232	0.195751	0.658173	0.999956
Anapc15	-0.0591564	0.729212	0.00364103	0.951884	0.999956
Anapc16	0.187519	4.59475	0.339387	0.560183	0.999956
Anapc2	-0.444487	4.93113	2.03847	0.153364	0.999956
Anapc4	-0.0720344	6.9395	0.105508	0.745317	0.999956
Anapc5	-0.0447505	6.24164	0.0231451	0.87908	0.999956
Anapc7	-0.120082	3.76773	0.107396	0.743129	0.999956
Ang	0.638549	0.663885	0.386681	0.534049	0.999956
Angel1	-1.00558	1.53254	1.7705	0.18332	0.999956
Angel2	0.0526548	6.28544	0.0558773	0.813135	0.999956
Angpt1	-0.530455	3.30565	1.80904	0.178623	0.999956
Angpt2	0.62378	0.854807	0.453853	0.500511	0.999956
Angptl2	0.942884	3.34597	1.73129	0.188246	0.999956
Angptl4	1.69462	0.66709	3.14862	0.0759912	0.999956
Angptl6	-0.0279572	3.5888	0.00422016	0.948204	0.999956
Ank	-0.0504582	7.94816	0.0615636	0.804042	0.999956
Ank1	-0.527435	4.37977	2.42375	0.119508	0.999956
Ank2	-0.0535203	9.03528	0.074096	0.785464	0.999956
Ank3	0.0122337	9.99114	0.0038262	0.950677	0.999956
Ankfy1	0.311583	5.3195	1.83144	0.175958	0.999956
Ankhd1	0.206239	6.37739	0.861832	0.353227	0.999956
Ankib1	0.0140195	4.94887	0.00172466	0.966874	0.999956
Ankle2	-0.294207	4.61866	1.16872	0.279664	0.999956
Ankmy2	-0.0266522	5.04052	0.00901324	0.924364	0.999956
Ankra2	0.0603504	7.48888	0.0767015	0.781818	0.999956
Ankrd10	0.135892	6.67919	0.471749	0.492184	0.999956
Ankrd11	0.266055	7.28341	1.51983	0.217645	0.999956
Ankrd12	0.310706	7.069	2.02329	0.154903	0.999956
Ankrd13a	0.271068	3.4993	0.434959	0.509566	0.999956
Ankrd13b	0.261966	4.00992	0.423566	0.515163	0.999956
Ankrd13c	-0.754504	1.60977	1.07303	0.300263	0.999956
Ankrd13d	-0.147205	3.71969	0.0923689	0.761187	0.999956
Ankrd16	0.144232	5.29528	0.330536	0.565344	0.999956
Ankrd17	0.139983	8.06514	0.587816	0.443265	0.999956
Ankrd24	-0.388853	5.205	1.68315	0.194506	0.999956
Ankrd26	0.665407	3.00765	1.7716	0.183184	0.999956
Ankrd27	-0.168377	6.21325	0.254656	0.613815	0.999956
Ankrd28	0.0837785	3.99574	0.0636084	0.800881	0.999956
Ankrd29	0.169172	4.20034	0.122514	0.726324	0.999956
Ankrd32	-0.114038	4.91269	0.14034	0.707943	0.999956
Ankrd33b	0.101949	4.61186	0.120133	0.72889	0.999956
Ankrd34a	-0.516711	4.98569	1.55031	0.21309	0.999956
Ankrd34b	-0.48856	3.78178	1.75948	0.184689	0.999956
Ankrd34c	-5.84933	0.127134	5.83256	0.0157322	0.999956
Ankrd35	0.0834359	2.8763	0.0252064	0.873854	0.999956
Ankrd37	0.582723	2.7374	1.65373	0.198452	0.999956
Ankrd39	0.082477	4.3194	0.073796	0.785888	0.999956
Ankrd40	-0.0599848	6.58317	0.0915788	0.76218	0.999956
Ankrd42	-0.28543	2.29907	0.275356	0.599761	0.999956
Ankrd44	-0.622791	3.31336	2.03804	0.153408	0.999956
Ankrd45	-0.0855567	6.54908	0.100403	0.751346	0.999956
Ankrd46	0.0287649	7.28064	0.0233826	0.878466	0.999956
Ankrd49	-0.534417	3.6513	1.32942	0.248908	0.999956
Ankrd50	-0.185523	5.22638	0.507688	0.476141	0.999956
Ankrd54	0.00232723	4.19152	4.36813e-05	0.994727	0.999956
Ankrd55	-1.68135	0.325869	2.27788	0.131232	0.999956
Ankrd6	-0.1068	6.70622	0.126734	0.721842	0.999956
Ankrd63	0.200507	4.49298	0.230164	0.631403	0.999956
Ankrd66	0.294553	0.782182	0.122457	0.726384	0.999956
Ankrd9	-0.198437	4.26837	0.306326	0.579944	0.999956
Anks1	-0.00106089	4.54986	1.079e-05	0.997379	0.999956
Anks1b	0.105856	9.25199	0.218444	0.640228	0.999956
Anks3	0.0147608	4.57032	0.00262433	0.959144	0.999956
Anks6	0.0254859	2.00757	0.0018102	0.966063	0.999956
Ankzf1	-0.375233	3.36798	0.574797	0.448359	0.999956
Anln	0.769007	5.27283	3.12673	0.0770181	0.999956
Ano1	1.59582	0.965872	1.58871	0.207511	0.999956
Ano10	-0.33477	3.7911	0.902261	0.342176	0.999956
Ano2	-0.603122	0.826137	0.313582	0.57549	0.999956
Ano3	-0.0393197	6.53057	0.0276336	0.867973	0.999956
Ano4	0.0828766	3.83492	0.0506726	0.821897	0.999956
Ano5	0.00181863	0.29734	5.71621e-06	0.998092	0.999956
Ano6	0.115361	4.62295	0.152017	0.696615	0.999956
Ano8	-0.414978	5.72382	2.31403	0.128211	0.999956
Anp32a	0.152838	7.21775	0.477654	0.489487	0.999956
Anp32b	0.0284386	5.34094	0.0115368	0.914464	0.999956
Anp32e	0.10271	7.72202	0.269917	0.603387	0.999956
Anpep	-0.386245	0.259831	0.079694	0.777713	0.999956
Antxr1	-0.0349282	3.9627	0.00522487	0.942377	0.999956
Antxr2	0.105718	0.939475	0.0128208	0.909849	0.999956
Anxa2	0.397646	3.42822	0.946586	0.33059	0.999956
Anxa3	0.703234	3.35851	3.26768	0.0706575	0.999956
Anxa4	0.931762	2.11348	1.50298	0.220214	0.999956
Anxa5	-0.0835801	5.49824	0.0665305	0.796457	0.999956
Anxa6	0.127629	7.28874	0.356614	0.550393	0.999956
Anxa7	0.0922911	5.93007	0.161075	0.688168	0.999956
Aoc2	0.659114	0.529277	0.438977	0.507617	0.999956
Aox1	0.536253	2.03916	0.609788	0.434868	0.999956
Aox3	0.398015	0.645262	0.124537	0.724164	0.999956
Ap1ar	0.0927157	4.152	0.0201409	0.887144	0.999956
Ap1b1	-0.292597	6.63965	1.52485	0.216887	0.999956
Ap1g1	-0.130472	6.98959	0.476815	0.489869	0.999956
Ap1g2	0.071703	1.869	0.011362	0.915112	0.999956
Ap1m1	-0.00414055	4.71444	0.000215839	0.988278	0.999956
Ap1s1	-0.312994	7.21439	1.76262	0.184298	0.999956
Ap1s2	-0.0503323	6.24795	0.0370756	0.847311	0.999956
Ap1s3	0.111493	1.79219	0.0270577	0.869344	0.999956
Ap2a1	0.314028	5.91324	0.983803	0.321262	0.999956
Ap2a2	-0.3675	6.28544	2.14749	0.142803	0.999956
Ap2b1	0.338316	6.09602	1.04975	0.305565	0.999956
Ap2m1	0.0217343	6.8485	0.00878158	0.925339	0.999956
Ap2s1	-0.325419	7.32008	0.965872	0.325712	0.999956
Ap3b1	0.303985	5.38736	1.08818	0.296874	0.999956
Ap3b2	0.149773	7.46654	0.422509	0.515688	0.999956
Ap3d1	0.08035	6.98737	0.172751	0.677678	0.999956
Ap3m1	0.189581	4.74917	0.427033	0.513449	0.999956
Ap3m2	-0.156206	7.23191	0.377233	0.539088	0.999956
Ap3s1	0.109707	3.14734	0.0342032	0.853275	0.999956
Ap3s2	-0.21434	5.27192	0.706635	0.400563	0.999956
Ap4b1	0.00104355	5.50907	1.46704e-05	0.996944	0.999956
Ap4e1	-0.313216	4.2202	0.991741	0.319317	0.999956
Ap4m1	-0.924044	0.236361	0.517305	0.471993	0.999956
Ap4s1	-0.0468568	5.57955	0.0339935	0.853721	0.999956
Ap5m1	0.835094	3.50619	2.14398	0.143131	0.999956
Ap5s1	0.455119	3.1036	0.61269	0.433777	0.999956
Ap5z1	0.473217	3.55056	1.58175	0.208508	0.999956
Apaf1	0.228015	6.11898	0.517433	0.471939	0.999956
Apba1	-0.182868	7.79014	0.362865	0.54692	0.999956
Apba2	-0.131513	6.03864	0.281756	0.595553	0.999956
Apba3	0.402834	2.61616	0.556741	0.455576	0.999956
Apbb1	0.123551	6.64876	0.168651	0.681314	0.999956
Apbb1ip	-0.0467779	3.92175	0.0160741	0.899112	0.999956
Apbb2	-0.110994	6.44706	0.256328	0.612654	0.999956
Apbb3	-0.232757	5.00205	0.480873	0.488027	0.999956
Apc	-0.194441	9.17237	0.603042	0.43742	0.999956
Apc2	-0.343166	5.02881	1.19175	0.274977	0.999956
Apeh	0.133706	2.86151	0.0559289	0.81305	0.999956
Apela	-0.307899	1.89821	0.205566	0.650265	0.999956
Apex1	0.0599068	4.9238	0.0346107	0.852414	0.999956
Apex2	-0.506091	0.527506	0.260892	0.609508	0.999956
Aph1a	0.147487	6.11696	0.493141	0.482529	0.999956
Aph1b	0.333569	4.36882	0.748456	0.386966	0.999956
Aph1c	0.0985394	3.28035	0.0307455	0.860809	0.999956
Api5	0.0285582	5.41703	0.0120633	0.912542	0.999956
Apip	0.621503	3.6229	2.20457	0.137602	0.999956
Apitd1	0.588539	1.98369	1.01926	0.312694	0.999956
Aplf	-0.254197	2.00738	0.126702	0.721877	0.999956
Apln	0.586696	5.13173	3.14502	0.0761592	0.999956
Aplp1	-0.153649	7.86289	0.607048	0.435901	0.999956
Aplp2	0.191539	7.77131	0.916422	0.338416	0.999956
Apmap	-0.0156061	6.4331	0.00412797	0.948772	0.999956
Apoa1bp	0.0875118	6.58163	0.153675	0.695048	0.999956
Apobec1	-0.280358	1.48227	0.134361	0.713953	0.999956
Apobec3	-0.123092	2.74935	0.032434	0.857079	0.999956
Apoc1	-1.54036	0.50904	1.4446	0.229397	0.999956
Apod	0.627086	6.78238	1.57353	0.209695	0.999956
Apoe	0.129133	10.0082	0.350677	0.55373	0.999956
Apold1	0.469965	2.37414	0.386826	0.533973	0.999956
Apoo	-0.769884	3.09874	2.83359	0.0923117	0.999956
Apool	-1.14698	0.769439	1.13676	0.286339	0.999956
Apopt1	0.146168	3.97527	0.187609	0.664914	0.999956
App	0.0138137	9.95735	0.00288354	0.957175	0.999956
Appbp2	0.247027	5.46427	0.438345	0.507922	0.999956
Appl1	0.172429	7.7069	0.708765	0.399854	0.999956
Appl2	-0.132043	5.96445	0.288049	0.591473	0.999956
Aprt	-0.75911	4.29737	4.75056	0.0292887	0.999956
Aptx	0.126245	4.62543	0.174897	0.675796	0.999956
Aqp1	-1.25303	3.56991	0.520172	0.470768	0.999956
Aqp11	-0.155226	3.83002	0.139603	0.708676	0.999956
Aqp4	-0.279284	7.14188	0.772715	0.379378	0.999956
Aqp9	1.85172	0.809733	2.3862	0.122411	0.999956
Aqr	0.375058	3.85891	0.924127	0.336394	0.999956
Ar	0.0388935	6.23662	0.0199655	0.887634	0.999956
Araf	-0.146709	8.54654	0.0594108	0.80743	0.999956
Arap1	-0.580299	3.15007	1.48555	0.222908	0.999956
Arap2	0.261426	7.37777	0.889188	0.345698	0.999956
Arap3	0.0397697	3.92023	0.0116384	0.91409	0.999956
Arc	-1.00799	5.79308	1.10104	0.294039	0.999956
Arcn1	-0.00132462	4.66513	2.98742e-06	0.998621	0.999956
Arel1	0.0242153	6.41054	0.0127106	0.910236	0.999956
Arf1	0.0300456	9.14291	0.0249501	0.874491	0.999956
Arf2	0.409586	5.24541	2.47305	0.115813	0.999956
Arf3	0.104393	9.5482	0.144478	0.703869	0.999956
Arf4	-0.0792238	6.84859	0.0787186	0.779041	0.999956
Arf5	-0.866709	2.82999	2.74194	0.097746	0.999956
Arf6	0.0213735	6.63715	0.012189	0.912089	0.999956
Arfgap1	-0.115068	5.79427	0.186946	0.665471	0.999956
Arfgap2	-0.632131	2.79546	1.84213	0.174702	0.999956
Arfgap3	0.0772967	5.19941	0.0962352	0.756395	0.999956
Arfgef1	0.0739994	7.53492	0.144185	0.704156	0.999956
Arfgef2	0.0211006	4.53798	0.00389401	0.950243	0.999956
Arfgef3	-0.237531	6.16872	0.91733	0.338177	0.999956
Arfip1	0.206314	4.79924	0.391699	0.531408	0.999956
Arfip2	0.0347271	5.86925	0.018573	0.891598	0.999956
Arfrp1	0.110153	6.07524	0.239307	0.624707	0.999956
Arg2	0.792282	1.09288	1.03454	0.309094	0.999956
Arglu1	-0.0599341	6.74391	0.0678362	0.794514	0.999956
Arhgap1	-0.507354	4.82987	3.36761	0.0664901	0.999956
Arhgap10	0.740086	1.98679	1.34072	0.246907	0.999956
Arhgap11a	0.350675	2.11478	0.269229	0.603849	0.999956
Arhgap12	0.373147	7.28122	1.99852	0.157453	0.999956
Arhgap15	0.403084	4.09277	1.67711	0.195309	0.999956
Arhgap17	-0.00683222	3.60767	0.000255935	0.987236	0.999956
Arhgap18	0.474468	3.57979	1.328	0.249162	0.999956
Arhgap19	0.0413627	0.601367	0.00164454	0.967652	0.999956
Arhgap20	-0.468501	3.7855	1.06715	0.30159	0.999956
Arhgap21	-0.148893	7.60901	0.473723	0.491279	0.999956
Arhgap22	0.427652	1.53421	0.275775	0.599484	0.999956
Arhgap23	0.204245	7.36915	0.968547	0.325043	0.999956
Arhgap24	-0.448093	1.79685	0.167624	0.682232	0.999956
Arhgap25	-0.759226	1.70135	0.775981	0.378373	0.999956
Arhgap26	0.0239437	6.38636	0.00501976	0.943517	0.999956
Arhgap27	-0.343226	3.16133	0.524758	0.468819	0.999956
Arhgap28	0.222009	0.529576	0.0409003	0.83973	0.999956
Arhgap29	-0.27083	3.9967	0.472584	0.491801	0.999956
Arhgap30	-0.785024	2.32924	1.18253	0.276842	0.999956
Arhgap31	0.347251	3.45878	0.632222	0.426541	0.999956
Arhgap32	-0.335883	8.32897	0.493513	0.482364	0.999956
Arhgap33	-0.419318	3.86035	0.615633	0.432675	0.999956
Arhgap35	-0.047031	6.49151	0.0514568	0.820547	0.999956
Arhgap36	-5.24196	0.914084	5.45578	0.0195037	0.999956
Arhgap39	0.537873	4.99664	2.24005	0.134477	0.999956
Arhgap4	-0.191004	1.21489	0.0569704	0.81135	0.999956
Arhgap42	-0.697341	1.19045	0.508197	0.47592	0.999956
Arhgap44	-0.250637	6.4012	1.27332	0.259145	0.999956
Arhgap5	0.492647	4.85695	2.00428	0.156856	0.999956
Arhgap6	0.241478	3.75094	0.11206	0.737811	0.999956
Arhgap9	0.243193	0.904583	0.0504896	0.822214	0.999956
Arhgdia	-0.139687	5.49388	0.316858	0.573502	0.999956
Arhgdib	-0.446086	2.84403	0.572789	0.449153	0.999956
Arhgdig	-0.425595	4.53821	1.46373	0.226338	0.999956
Arhgef1	-0.050722	4.72589	0.0219193	0.882302	0.999956
Arhgef10l	-0.477533	4.51021	0.645411	0.421758	0.999956
Arhgef11	-0.159424	4.61092	0.331432	0.564817	0.999956
Arhgef12	-0.0807016	6.81368	0.140518	0.707767	0.999956
Arhgef15	-0.77907	3.55335	1.09263	0.29589	0.999956
Arhgef17	0.045402	7.96468	0.0343354	0.852995	0.999956
Arhgef18	0.233545	4.2996	0.590708	0.442145	0.999956
Arhgef19	0.334974	2.22982	0.309423	0.578035	0.999956
Arhgef2	-0.0727081	5.85857	0.0809614	0.775999	0.999956
Arhgef25	0.208038	8.52884	0.479447	0.488673	0.999956
Arhgef26	0.0519952	5.05719	0.0295326	0.863555	0.999956
Arhgef28	0.764112	4.70623	1.99238	0.158092	0.999956
Arhgef3	0.0590314	6.45161	0.0629034	0.801964	0.999956
Arhgef39	0.457939	0.124689	0.131924	0.716446	0.999956
Arhgef4	0.0684579	5.55775	0.0612264	0.804568	0.999956
Arhgef40	-0.19353	3.85442	0.23761	0.625938	0.999956
Arhgef5	1.05412	1.74433	2.17264	0.140485	0.999956
Arhgef6	-0.474619	4.17788	1.75783	0.184896	0.999956
Arhgef7	-0.0520497	7.95508	0.0394863	0.842488	0.999956
Arhgef9	0.0374994	8.02771	0.0218566	0.882469	0.999956
Arid1a	-0.353304	6.23468	2.57691	0.108433	0.999956
Arid1b	-0.0761121	7.21012	0.0672181	0.795431	0.999956
Arid2	0.144196	5.81574	0.258493	0.611158	0.999956
Arid3a	-0.523736	3.89283	2.19875	0.138123	0.999956
Arid3b	-0.213334	2.49977	0.169536	0.680525	0.999956
Arid4a	0.432291	7.03164	4.02973	0.044705	0.999956
Arid4b	0.336045	7.49328	1.41944	0.233496	0.999956
Arid5a	-0.247113	2.09519	0.122341	0.726509	0.999956
Arid5b	0.816614	4.13153	4.48765	0.0341405	0.999956
Arih1	0.099333	6.88757	0.252383	0.615402	0.999956
Arih2	-0.121763	5.79671	0.265547	0.606334	0.999956
Arl13b	0.0265633	2.86252	0.00249311	0.960177	0.999956
Arl14ep	0.0802947	6.36806	0.0702611	0.790957	0.999956
Arl15	-0.161153	5.58951	0.11244	0.737383	0.999956
Arl16	0.124612	5.13801	0.202545	0.652675	0.999956
Arl2	-0.228692	4.65048	0.213653	0.643919	0.999956
Arl2bp	-0.0421479	7.70633	0.0390836	0.843283	0.999956
Arl3	0.144241	6.41313	0.280154	0.5966	0.999956
Arl4a	0.0541402	6.78405	0.0415238	0.83853	0.999956
Arl4c	-0.367573	6.28755	1.0182	0.312945	0.999956
Arl4d	1.25072	1.04608	0.976693	0.323017	0.999956
Arl5a	-0.163209	5.19243	0.187225	0.665237	0.999956
Arl5b	0.467708	0.861468	0.199717	0.654949	0.999956
Arl5c	-0.311759	1.30736	0.220198	0.638889	0.999956
Arl6	0.100616	6.51858	0.215219	0.642707	0.999956
Arl6ip1	0.247354	9.25929	1.20745	0.271837	0.999956
Arl6ip4	-0.0410513	5.64111	0.0277805	0.867626	0.999956
Arl6ip5	0.179998	5.77502	0.553873	0.456739	0.999956
Arl6ip6	-0.0396144	4.62979	0.00649721	0.935756	0.999956
Arl8a	-0.68965	6.78927	4.82768	0.0280064	0.999956
Arl8b	-0.0659188	6.98321	0.113069	0.736676	0.999956
Armc1	0.151219	7.97362	0.574038	0.448659	0.999956
Armc10	-0.134082	5.02007	0.151932	0.696696	0.999956
Armc2	0.0598511	1.71769	0.00708081	0.932939	0.999956
Armc3	-0.0813542	0.309354	0.00609408	0.937777	0.999956
Armc5	-0.0887774	4.50716	0.0853249	0.770207	0.999956
Armc6	0.164353	3.285	0.202713	0.65254	0.999956
Armc7	-1.33016	1.93217	3.07577	0.0794668	0.999956
Armc8	-0.0756895	7.18347	0.14305	0.705268	0.999956
Armc9	-0.267655	4.66031	0.657914	0.417297	0.999956
Armcx1	-0.0340559	6.56491	0.0215959	0.883167	0.999956
Armcx2	-0.156867	7.44306	0.532876	0.4654	0.999956
Armcx3	0.160244	3.47821	0.142792	0.705521	0.999956
Armcx4	-0.251105	5.9905	1.04815	0.305935	0.999956
Armcx5	-0.280899	6.20108	0.916623	0.338363	0.999956
Armcx6	-2.57263	1.07603	5.93732	0.0148235	0.999956
Armt1	0.262618	3.90806	0.615084	0.43288	0.999956
Arnt	0.165751	3.98843	0.211453	0.645631	0.999956
Arnt2	-0.269706	8.80715	1.15902	0.281669	0.999956
Arntl	-0.0835226	5.26901	0.039071	0.843308	0.999956
Arntl2	-0.733502	1.69567	1.19525	0.274272	0.999956
Arpc1a	-0.0660982	7.61515	0.105113	0.745778	0.999956
Arpc1b	0.0262822	5.45342	0.0101895	0.919596	0.999956
Arpc2	0.28388	8.83237	0.994429	0.318662	0.999956
Arpc3	0.136078	7.4614	0.419069	0.517402	0.999956
Arpc4	0.0737508	5.34188	0.0987164	0.753375	0.999956
Arpc5	0.06815	6.67366	0.0357847	0.849961	0.999956
Arpc5l	-0.106523	7.6771	0.220594	0.638588	0.999956
Arpin	-1.02359	2.19464	3.71651	0.0538768	0.999956
Arpp19	-0.252208	7.5037	0.14586	0.702524	0.999956
Arpp21	-0.285684	8.5528	0.551758	0.4576	0.999956
Arrb1	-0.00812551	7.93297	0.000788183	0.977603	0.999956
Arrb2	-0.261318	5.74406	0.954249	0.32864	0.999956
Arrdc2	1.55676	2.56484	6.22991	0.012561	0.999956
Arrdc4	-0.24793	1.9613	0.124216	0.724506	0.999956
Arsa	-0.248524	3.72118	0.126143	0.722465	0.999956
Arsb	-0.00558068	5.80096	0.000227625	0.987963	0.999956
Arsg	0.757399	3.77982	1.78114	0.182009	0.999956
Arsj	0.70536	3.13657	1.54493	0.213886	0.999956
Art3	0.0706185	1.89025	0.0127844	0.909977	0.999956
Arv1	0.00316257	2.63801	2.87079e-05	0.995725	0.999956
Arvcf	0.178627	2.85768	0.115178	0.734324	0.999956
Arx	-0.173034	4.53183	0.147013	0.701406	0.999956
Arxes1	0.121169	4.9872	0.181356	0.67021	0.999956
Arxes2	-0.140232	6.48018	0.344285	0.557366	0.999956
As3mt	-0.482155	1.99653	0.571896	0.449506	0.999956
Asah1	0.319862	3.76452	0.726256	0.394099	0.999956
Asah2	0.989058	1.67524	1.77913	0.182257	0.999956
Asap1	0.275353	6.38264	0.476426	0.490046	0.999956
Asap2	0.288003	5.89392	1.35541	0.244334	0.999956
Asap3	-0.787076	0.798521	0.715693	0.39756	0.999956
Asb1	-0.164224	5.73198	0.426139	0.51389	0.999956
Asb10	-0.949599	0.186072	0.515598	0.472725	0.999956
Asb11	-1.29344	0.221798	1.20622	0.272082	0.999956
Asb13	-0.11429	5.16774	0.197308	0.656902	0.999956
Asb2	-1.00813	0.408793	0.781059	0.376817	0.999956
Asb3	0.714253	4.42694	3.21512	0.0729609	0.999956
Asb4	-3.10318	1.22955	6.06191	0.0138128	0.999956
Asb5	0.885782	0.340103	0.648124	0.420784	0.999956
Asb6	-0.44542	3.57582	1.40979	0.235091	0.999956
Asb7	-0.135947	4.85536	0.20408	0.651447	0.999956
Asb8	-0.189947	5.4142	0.561403	0.453696	0.999956
Ascc1	0.370979	2.60982	0.656356	0.417849	0.999956
Ascc3	0.07063	4.14338	0.0365247	0.848436	0.999956
Ascl1	0.641533	0.876444	0.357707	0.549783	0.999956
Ascl2	0.469996	0.350044	0.150448	0.698108	0.999956
Ascl4	-1.13835	0.0691066	0.475339	0.490541	0.999956
Asf1a	0.664394	3.63862	2.40713	0.120784	0.999956
Asf1b	-1.07369	0.629706	0.962025	0.326677	0.999956
Asgr1	0.474207	3.07515	0.306891	0.579595	0.999956
Ash1l	0.194545	7.1175	0.618928	0.431446	0.999956
Ash2l	0.120166	6.73398	0.255094	0.613511	0.999956
Asic1	0.0103017	4.14616	0.00027595	0.986746	0.999956
Asic2	-0.118417	6.85245	0.0942341	0.758862	0.999956
Asic4	-0.139776	2.6828	0.0412793	0.839	0.999956
Asl	0.592456	2.47512	1.47506	0.224549	0.999956
Asna1	0.135181	4.30749	0.190479	0.662519	0.999956
Asns	-0.231438	4.77987	0.664622	0.414933	0.999956
Asnsd1	0.362877	3.50782	1.01135	0.31458	0.999956
Aspa	-0.280048	4.35502	0.337466	0.561296	0.999956
Aspdh	-0.388664	0.544045	0.130899	0.717502	0.999956
Aspg	-0.643546	0.733928	0.323943	0.569247	0.999956
Asph	0.189515	7.17564	0.59697	0.439736	0.999956
Asphd1	-0.185128	4.49498	0.111138	0.738852	0.999956
Asphd2	-0.139707	6.6554	0.32715	0.567342	0.999956
Aspm	-0.616292	0.186869	0.280554	0.596338	0.999956
Aspn	-0.00874289	0.581322	8.79787e-05	0.992516	0.999956
Asprv1	-0.659326	0.487294	0.217279	0.641121	0.999956
Aspscr1	-0.00828833	1.80372	0.000125323	0.991068	0.999956
Asrgl1	0.339359	5.11783	1.7369	0.187532	0.999956
Aste1	-0.671323	1.33644	0.69041	0.406025	0.999956
Astn1	-0.101978	5.90671	0.123988	0.724749	0.999956
Astn2	-0.167549	3.92313	0.0910332	0.762868	0.999956
Asun	0.141061	4.30468	0.185481	0.666705	0.999956
Asxl1	-0.482213	4.86275	2.54661	0.110531	0.999956
Asxl2	-0.0506343	5.76604	0.0462631	0.829698	0.999956
Asxl3	0.0311944	3.32712	0.00615434	0.93747	0.999956
Atad1	-0.157581	8.22713	0.577926	0.447126	0.999956
Atad2	0.31566	3.29698	0.384935	0.534974	0.999956
Atad2b	0.0999308	6.36187	0.230996	0.630786	0.999956
Atad3a	0.0590379	3.67285	0.0242962	0.876134	0.999956
Atad3aos	0.0418008	1.52264	0.00424876	0.948029	0.999956
Atad5	0.827605	3.22039	2.66706	0.102445	0.999956
Atat1	0.18886	4.63046	0.443332	0.505519	0.999956
Atcay	-0.0834554	5.5855	0.129358	0.719098	0.999956
Ate1	0.245416	7.12206	1.35664	0.24412	0.999956
Atf1	-0.290343	4.84191	0.574783	0.448365	0.999956
Atf2	-0.219715	6.73703	1.00156	0.316932	0.999956
Atf3	0.415396	0.712168	0.179331	0.671949	0.999956
Atf4	0.36437	8.41175	1.30646	0.253037	0.999956
Atf6	0.115906	5.91445	0.112533	0.737278	0.999956
Atf6b	-0.0142172	7.22047	0.00421155	0.948256	0.999956
Atf7	0.148924	4.0671	0.213426	0.644095	0.999956
Atf7ip	-0.111978	4.86125	0.154198	0.694555	0.999956
Atg10	-0.205685	3.74588	0.21381	0.643797	0.999956
Atg101	0.0981418	5.77552	0.128068	0.720444	0.999956
Atg12	0.166481	7.5582	0.500914	0.479099	0.999956
Atg13	0.17324	4.98756	0.385981	0.534419	0.999956
Atg14	-0.302197	3.70725	0.494592	0.481886	0.999956
Atg16l1	0.0605809	4.80449	0.04304	0.83565	0.999956
Atg16l2	-0.337578	5.19505	0.606509	0.436105	0.999956
Atg2a	0.0912181	5.11903	0.0908447	0.763106	0.999956
Atg2b	0.1789	5.95058	0.402526	0.525787	0.999956
Atg3	-0.0800197	5.83127	0.0980947	0.754128	0.999956
Atg4b	0.149428	6.29419	0.4014	0.526367	0.999956
Atg4c	-0.223195	6.34505	1.04836	0.305885	0.999956
Atg4d	-0.0392294	3.28347	0.00679849	0.934287	0.999956
Atg5	0.136631	4.56867	0.23786	0.625756	0.999956
Atg7	-0.144605	3.93182	0.158585	0.690463	0.999956
Atg9a	-0.196438	5.06585	0.505717	0.476999	0.999956
Atg9b	1.27912	0.973539	1.99186	0.158147	0.999956
Athl1	-0.610695	1.51713	0.571257	0.44976	0.999956
Atic	-0.173137	5.27892	0.349788	0.554233	0.999956
Atl1	-0.195025	6.41488	0.643962	0.42228	0.999956
Atl2	-0.158551	6.0736	0.282337	0.595173	0.999956
Atl3	-0.118039	4.16032	0.139809	0.708471	0.999956
Atm	-0.0629518	6.6516	0.0511123	0.821139	0.999956
Atmin	-0.021049	5.56198	0.00737478	0.931565	0.999956
Atn1	-0.334572	5.69935	1.31649	0.251223	0.999956
Atoh8	0.976026	1.35681	1.06602	0.301847	0.999956
Atox1	0.0194048	4.86688	0.004892	0.944239	0.999956
Atp10a	-0.494689	1.81542	0.499818	0.47958	0.999956
Atp10b	0.187043	1.29554	0.0557692	0.813312	0.999956
Atp10d	-1.62537	0.361669	2.2129	0.136862	0.999956
Atp11a	0.063284	5.32907	0.0443758	0.833156	0.999956
Atp11b	-0.0158891	5.48689	0.00270667	0.958508	0.999956
Atp11c	0.302133	4.03757	0.866549	0.351912	0.999956
Atp13a1	-0.802503	3.95968	3.84932	0.0497662	0.999956
Atp13a2	0.12335	5.12173	0.16813	0.681779	0.999956
Atp13a3	-0.0991665	5.9189	0.0836669	0.772388	0.999956
Atp13a4	0.663549	0.277771	0.175773	0.675031	0.999956
Atp13a5	0.314697	3.66166	0.589655	0.442553	0.999956
Atp1a1	-0.296575	9.93028	1.22082	0.2692	0.999956
Atp1a2	0.190627	10.8111	0.849301	0.35675	0.999956
Atp1a3	0.0479725	7.82107	0.0323764	0.857204	0.999956
Atp1b1	-0.105531	11.7629	0.267715	0.604869	0.999956
Atp1b2	-0.0342045	7.7025	0.0199936	0.887555	0.999956
Atp1b3	0.000709018	7.08904	7.66016e-06	0.997792	0.999956
Atp2a2	-0.16656	8.85202	0.818407	0.365646	0.999956
Atp2a3	1.02839	1.62041	2.47481	0.115683	0.999956
Atp2b1	0.245185	10.95	0.541678	0.461738	0.999956
Atp2b2	-0.107882	8.30012	0.133119	0.715219	0.999956
Atp2b3	-0.00487604	7.8141	0.000279386	0.986664	0.999956
Atp2b4	-0.272949	7.74159	0.145008	0.703352	0.999956
Atp2c1	-0.150441	7.12804	0.553658	0.456827	0.999956
Atp2c2	-1.46126	0.129743	1.53791	0.214929	0.999956
Atp5a1	-0.0689674	9.72546	0.0784995	0.779341	0.999956
Atp5b	-0.0806681	8.35389	0.146713	0.701696	0.999956
Atp5c1	-0.259529	6.74056	1.51435	0.218477	0.999956
Atp5d	-0.303077	6.61849	2.24102	0.134392	0.999956
Atp5e	0.0214129	6.85527	0.010108	0.919917	0.999956
Atp5f1	-0.153273	8.06735	0.522703	0.469691	0.999956
Atp5g1	-0.0485747	6.20508	0.0521412	0.819378	0.999956
Atp5g2	-0.346063	3.01747	0.501688	0.478759	0.999956
Atp5g3	-0.0691516	10.6021	0.140349	0.707934	0.999956
Atp5h	-0.0759141	7.95159	0.139758	0.708521	0.999956
Atp5j	-0.120289	7.40954	0.108297	0.742091	0.999956
Atp5j2	-0.221104	7.26644	1.20238	0.272846	0.999956
Atp5k	0.00907411	8.4267	0.00181008	0.966064	0.999956
Atp5l	0.240264	6.79271	0.162765	0.686623	0.999956
Atp5o	-0.157864	8.2403	0.569138	0.450602	0.999956
Atp5s	-0.0269383	3.30224	0.0041562	0.948597	0.999956
Atp5sl	0.076623	4.44658	0.0564934	0.812127	0.999956
Atp6ap1	-0.00198789	9.58745	5.75022e-05	0.99395	0.999956
Atp6ap1l	-0.681016	1.11839	0.120813	0.728154	0.999956
Atp6ap2	-0.0800529	10.3547	0.104877	0.746054	0.999956
Atp6v0a1	0.00844609	7.73446	0.00104669	0.974191	0.999956
Atp6v0a2	0.393273	4.90432	2.23581	0.134846	0.999956
Atp6v0b	-0.0667796	7.76667	0.0934532	0.759832	0.999956
Atp6v0d1	-0.30204	7.88048	2.15027	0.142545	0.999956
Atp6v0e	0.260551	5.0196	0.572041	0.449449	0.999956
Atp6v0e2	-0.189403	8.57232	0.63574	0.425258	0.999956
Atp6v1a	-0.172918	10.1348	0.444548	0.504935	0.999956
Atp6v1b2	-0.124898	10.4329	0.220934	0.638329	0.999956
Atp6v1c1	-0.109828	8.49365	0.2671	0.605284	0.999956
Atp6v1c2	-2.90898	0.00554026	1.26315	0.261056	0.999956
Atp6v1d	0.00379085	8.08171	0.000278776	0.986679	0.999956
Atp6v1e1	-0.0624059	8.43561	0.110549	0.73952	0.999956
Atp6v1f	-0.13572	8.45709	0.273243	0.601164	0.999956
Atp6v1g1	-0.051891	6.04935	0.0513952	0.820653	0.999956
Atp6v1g2	-0.107535	8.5784	0.230477	0.63117	0.999956
Atp6v1h	-0.103606	8.19123	0.287493	0.591832	0.999956
Atp7a	0.299888	4.94137	0.675695	0.411073	0.999956
Atp8a1	0.0321611	7.88359	0.0200562	0.88738	0.999956
Atp8b1	-0.691074	1.61863	0.783041	0.376213	0.999956
Atp8b2	-0.307076	3.94846	0.818259	0.36569	0.999956
Atp8b5	0.59727	0.204523	0.287161	0.592046	0.999956
Atp9a	-0.137102	9.85503	0.278587	0.597629	0.999956
Atp9b	0.0301601	4.1355	0.00640978	0.936189	0.999956
Atpaf1	-1.07774	2.38997	3.65002	0.0560685	0.999956
Atpaf2	0.387538	3.15313	0.90199	0.342249	0.999956
Atpif1	-0.270301	8.05382	1.76398	0.184129	0.999956
Atr	0.185928	2.7003	0.106446	0.744227	0.999956
Atraid	-0.2357	5.8943	1.04046	0.307714	0.999956
Atrip	-0.574274	2.61643	1.25526	0.26255	0.999956
Atrn	-0.100991	7.81011	0.0972558	0.755148	0.999956
Atrnl1	-0.233821	5.9571	0.861308	0.353373	0.999956
Atrx	0.0579633	8.47368	0.0872489	0.767704	0.999956
Atxn1	0.177553	6.65137	0.359294	0.548899	0.999956
Atxn10	-0.0222779	8.17985	0.0108486	0.917045	0.999956
Atxn1l	0.172039	4.91368	0.248879	0.617866	0.999956
Atxn2	0.348922	5.34714	0.427374	0.51328	0.999956
Atxn2l	0.438641	3.89755	0.302437	0.582359	0.999956
Atxn3	0.44917	4.94152	1.67014	0.196239	0.999956
Atxn7	0.0626548	5.98349	0.0503451	0.822464	0.999956
Atxn7l1	-0.0954984	4.6169	0.109159	0.741103	0.999956
Atxn7l2	0.340161	2.13343	0.366678	0.54482	0.999956
Atxn7l3	-0.586114	7.29408	3.13212	0.0767638	0.999956
Atxn7l3b	-0.0603625	9.3545	0.101904	0.749556	0.999956
Auh	-0.127871	7.02391	0.420631	0.516622	0.999956
Aunip	-1.63986	0.29661	1.47669	0.224294	0.999956
Aup1	0.29139	5.77834	1.38971	0.238455	0.999956
Aurka	0.0228718	1.23175	0.000743283	0.97825	0.999956
Aurkaip1	0.074267	5.96449	0.117989	0.731226	0.999956
Auts2	0.0687373	6.71121	0.0765741	0.781995	0.999956
Aven	0.175279	3.77998	0.159473	0.689642	0.999956
Avl9	-0.158797	6.65485	0.527695	0.467577	0.999956
Avpi1	-0.338856	4.40307	1.0719	0.300516	0.999956
Avpr1b	1.40278	0.0943424	1.64651	0.199435	0.999956
Axin1	0.222434	4.24243	0.364779	0.545864	0.999956
Axin2	-0.121462	4.40773	0.0744536	0.784959	0.999956
Axl	-0.161112	4.12287	0.235938	0.627155	0.999956
Azi2	-0.0846998	5.30084	0.0727485	0.787376	0.999956
Azin1	0.287651	7.76531	2.33341	0.126624	0.999956
Azin2	-0.0797565	1.57979	0.0105473	0.918201	0.999956
B130006D01Rik	0.0486402	2.34939	0.00616552	0.937414	0.999956
B130024G19Rik	-0.196902	0.47157	0.020972	0.884855	0.999956
B130034C11Rik	-0.284707	1.04855	0.10757	0.742927	0.999956
B230118H07Rik	-0.2104	5.17707	0.541876	0.461656	0.999956
B230206H07Rik	0.534232	2.81245	0.591648	0.441783	0.999956
B230208H11Rik	-0.858357	0.645053	0.534439	0.464747	0.999956
B230209E15Rik	0.174493	5.61352	0.387444	0.533646	0.999956
B230216N24Rik	-0.516928	3.76609	0.715979	0.397466	0.999956
B230217C12Rik	-0.154995	4.7991	0.322844	0.569904	0.999956
B230217O12Rik	-0.503851	2.55361	0.941771	0.331823	0.999956
B230219D22Rik	-0.113462	7.21336	0.378843	0.538223	0.999956
B230307C23Rik	-0.564233	2.54874	0.862571	0.35302	0.999956
B230354K17Rik	0.286439	5.2364	1.1469	0.2842	0.999956
B2m	-0.156022	7.57106	0.328131	0.566762	0.999956
B330016D10Rik	-0.0520057	3.28194	0.018687	0.891268	0.999956
B3galnt1	-0.227632	6.25916	0.780533	0.376978	0.999956
B3galnt2	-0.22982	5.10422	0.316003	0.57402	0.999956
B3galt1	-0.0152767	4.96856	0.00244135	0.960593	0.999956
B3galt2	0.0794072	5.43306	0.10873	0.741595	0.999956
B3galt4	-4.6946	0.0908245	3.68511	0.0549002	0.999956
B3galt5	0.71151	6.98871	3.22232	0.0726407	0.999956
B3galt6	-0.491806	4.07208	2.05113	0.152093	0.999956
B3gat1	-0.280957	7.37251	1.32833	0.249102	0.999956
B3gat2	0.529365	1.63982	0.578711	0.446818	0.999956
B3gat3	0.143724	5.88227	0.294786	0.58717	0.999956
B3glct	0.313238	4.42775	0.909797	0.340168	0.999956
B3gnt2	-0.303392	5.33823	1.55666	0.212154	0.999956
B3gnt8	0.115774	0.681996	0.0120809	0.912478	0.999956
B3gnt9	1.24161	0.766792	1.1006	0.294134	0.999956
B3gntl1	-0.25055	2.25282	0.201117	0.653821	0.999956
B430319G15Rik	-1.66412	0.818608	2.10034	0.147267	0.999956
B4galnt1	-0.0671123	3.59467	0.0225807	0.880553	0.999956
B4galnt4	-0.590858	2.55635	1.34253	0.246588	0.999956
B4galt1	0.139797	4.57665	0.246095	0.619839	0.999956
B4galt2	-0.363584	6.6614	1.41867	0.233623	0.999956
B4galt3	0.0800314	5.52774	0.067742	0.794653	0.999956
B4galt4	0.269041	5.23431	0.672413	0.412212	0.999956
B4galt5	-0.547164	5.11918	3.50544	0.0611677	0.999956
B4galt6	0.0136922	7.90404	0.00418951	0.948392	0.999956
B4gat1	-0.261811	7.0546	1.67739	0.195271	0.999956
B630005N14Rik	-0.0908064	6.75076	0.141728	0.706569	0.999956
B630019K06Rik	-0.333067	5.90982	1.97671	0.159737	0.999956
B830017H08Rik	-0.433093	1.64495	0.45524	0.499857	0.999956
B930025P03Rik	0.424553	1.4813	0.277241	0.598515	0.999956
B930041F14Rik	-0.00384526	4.09632	0.000130561	0.990883	0.999956
B930059L03Rik	-0.093531	1.16387	0.0112504	0.915528	0.999956
B9d1	0.537706	2.19342	0.858461	0.35417	0.999956
B9d2	-0.106296	3.91546	0.0946008	0.758408	0.999956
BB557941	0.692927	0.374458	0.480837	0.488043	0.999956
BC002163	-0.331729	5.68341	0.510491	0.474927	0.999956
BC003331	0.391688	6.12422	2.56929	0.108957	0.999956
BC003965	0.140654	5.46139	0.3072	0.579404	0.999956
BC004004	-0.0790831	5.29096	0.0935472	0.759715	0.999956
BC005537	-0.0214007	1.88295	0.00108017	0.973781	0.999956
BC005561	0.15456	6.58621	0.516001	0.472552	0.999956
BC005624	-0.320844	4.5864	1.35404	0.244574	0.999956
BC006965	-0.723917	0.908029	0.392933	0.530762	0.999956
BC017158	-0.0187912	3.34442	0.00203399	0.964028	0.999956
BC017643	0.40437	5.42939	2.45167	0.1174	0.999956
BC020402	-1.16394	1.00434	1.43642	0.230719	0.999956
BC021891	-0.775626	0.745494	0.476986	0.489791	0.999956
BC022687	0.0782967	2.55674	0.0257733	0.872455	0.999956
BC023829	-0.476123	0.219834	0.113309	0.736408	0.999956
BC024978	0.388519	1.55718	0.253905	0.614339	0.999956
BC025920	0.653749	0.895455	0.489858	0.483991	0.999956
BC027231	-0.720648	0.588743	0.518578	0.471449	0.999956
BC029214	-0.343993	3.70412	0.921447	0.337095	0.999956
BC029722	-0.0344458	5.34091	0.0152006	0.901877	0.999956
BC030336	-0.0235676	6.02399	0.0028821	0.957186	0.999956
BC030499	0.616426	1.77535	0.641916	0.423018	0.999956
BC030500	-0.513113	2.59903	0.486079	0.485682	0.999956
BC031181	0.204594	7.22984	1.01634	0.31339	0.999956
BC031361	0.528535	0.792634	0.328272	0.566678	0.999956
BC035044	1.50545	0.659696	2.13289	0.144168	0.999956
BC037034	-0.102316	6.27776	0.109054	0.741224	0.999956
BC037704	-0.444384	0.615544	0.221209	0.63812	0.999956
BC039966	1.92668	0.216776	0.934937	0.333583	0.999956
BC048403	-0.424999	2.45037	0.618958	0.431435	0.999956
BC048546	-0.763145	4.86569	1.79351	0.180499	0.999956
BC051142	0.29094	2.24846	0.126414	0.72218	0.999956
BC051226	0.240698	3.7202	0.263869	0.607474	0.999956
BC052040	0.700288	4.11173	4.32966	0.0374537	0.999956
BC055324	-1.82003	1.01216	3.14104	0.076345	0.999956
BC055402	2.72565	0.28087	4.35161	0.0369739	0.999956
BC064078	0.72116	0.957637	0.696922	0.40382	0.999956
BC065397	0.205766	3.57568	0.233589	0.628876	0.999956
BC068281	0.310388	0.66483	0.0676683	0.794763	0.999956
Baalc	-0.229885	7.14303	0.782935	0.376245	0.999956
Babam1	-0.210708	5.24818	0.66676	0.414183	0.999956
Bace1	-0.0755511	5.81279	0.0880147	0.766716	0.999956
Bace2	-1.63379	1.6261	3.81182	0.050892	0.999956
Bach1	0.0210685	3.62374	0.00253937	0.95981	0.999956
Bach2	-0.0501082	4.62417	0.0237798	0.877446	0.999956
Bad	0.198843	6.46866	0.692963	0.405158	0.999956
Bag1	-0.0663201	5.47253	0.0688269	0.793053	0.999956
Bag2	-0.168041	3.71116	0.172009	0.678333	0.999956
Bag3	0.141462	4.73618	0.268007	0.604672	0.999956
Bag4	0.299971	6.84645	0.566029	0.451841	0.999956
Bag5	0.233061	6.08186	0.918049	0.337988	0.999956
Bag6	-0.108122	5.53989	0.153234	0.695464	0.999956
Bahcc1	-0.324103	2.58633	0.361055	0.547921	0.999956
Bahd1	-0.101513	5.19463	0.118026	0.731186	0.999956
Baiap2	0.252978	7.00661	1.20715	0.271897	0.999956
Baiap2l1	-1.26031	0.754881	0.754165	0.385161	0.999956
Baiap2l2	-1.45704	0.1082	0.913046	0.339307	0.999956
Baiap3	-1.48731	2.56321	2.30524	0.128938	0.999956
Bak1	0.0749328	3.8875	0.0479209	0.826721	0.999956
Bambi	-0.270909	2.41149	0.1888	0.663917	0.999956
Bambi-ps1	0.89906	1.25094	1.64784	0.199253	0.999956
Banf1	-0.0869032	5.1798	0.110756	0.739285	0.999956
Bank1	0.789797	0.473794	0.736763	0.3907	0.999956
Banp	0.186765	5.82655	0.349778	0.554239	0.999956
Bap1	-0.166026	5.91558	0.388664	0.533002	0.999956
Bard1	-0.0801548	0.305821	0.00681504	0.934207	0.999956
Barx2	-0.625854	1.53232	0.466843	0.494443	0.999956
Basp1	-0.092801	9.96152	0.233203	0.629159	0.999956
Bax	0.352545	3.3799	0.739926	0.389685	0.999956
Baz1a	0.619524	2.00827	1.43041	0.231697	0.999956
Baz1b	0.502269	7.23338	5.41877	0.0199213	0.999956
Baz2a	0.454682	4.25271	1.46057	0.226839	0.999956
Baz2b	0.489918	5.68898	2.67795	0.101747	0.999956
Bbc3	-0.665045	5.73609	5.76663	0.0163333	0.999956
Bbip1	0.039612	4.94291	0.0151394	0.902074	0.999956
Bbox1	0.409064	0.502557	0.100556	0.751164	0.999956
Bbs1	-0.261909	4.67374	0.64534	0.421784	0.999956
Bbs10	1.35568	1.79175	2.85509	0.091085	0.999956
Bbs12	-0.303552	1.58785	0.225891	0.634588	0.999956
Bbs2	0.138266	3.88635	0.179166	0.672091	0.999956
Bbs4	-0.23988	4.68477	0.480325	0.488275	0.999956
Bbs5	0.244799	3.84148	0.0980844	0.754141	0.999956
Bbs7	-0.132013	3.09022	0.10796	0.742479	0.999956
Bbs9	0.0353924	4.18383	0.0113315	0.915226	0.999956
Bbx	0.63092	4.7153	1.88258	0.170041	0.999956
Bc1	0.356545	4.62048	0.790774	0.373866	0.999956
Bcam	0.378603	1.33459	0.141506	0.706788	0.999956
Bcan	-0.0669633	6.74956	0.107251	0.743296	0.999956
Bcap29	0.209071	5.87158	0.996333	0.318199	0.999956
Bcap31	-0.157411	5.39961	0.341482	0.558975	0.999956
Bcar1	-0.0767632	4.67795	0.0466556	0.828988	0.999956
Bcar3	0.502289	2.96097	1.20911	0.271509	0.999956
Bcas2	0.194575	6.18382	0.357298	0.55001	0.999956
Bcas3	0.0597262	4.17651	0.0288852	0.865044	0.999956
Bcat1	0.45651	5.62768	4.11941	0.0423939	0.999956
Bcat2	1.21442	1.22054	1.48656	0.222751	0.999956
Bccip	-0.667358	4.55531	3.42213	0.0643282	0.999956
Bcdin3d	0.360821	2.21315	0.456942	0.499056	0.999956
Bche	-0.0742173	1.84115	0.00729216	0.931948	0.999956
Bckdha	-0.249889	2.89	0.223062	0.636717	0.999956
Bckdhb	0.259269	5.98427	1.18333	0.27668	0.999956
Bckdk	-0.385385	4.08638	1.19451	0.274422	0.999956
Bcl10	-0.0933169	3.6562	0.0383226	0.844797	0.999956
Bcl11a	-0.015926	7.96216	0.00680706	0.934245	0.999956
Bcl11b	0.554865	8.40074	2.74538	0.0975357	0.999956
Bcl2	-0.18925	5.35442	0.225099	0.635182	0.999956
Bcl2a1b	-0.577781	2.10921	1.01338	0.314094	0.999956
Bcl2a1d	0.352291	0.588357	0.143166	0.705154	0.999956
Bcl2l1	0.142955	6.94818	0.32766	0.56704	0.999956
Bcl2l11	0.292958	3.17424	0.506134	0.476817	0.999956
Bcl2l13	-0.208856	4.38617	0.431412	0.511297	0.999956
Bcl2l2	-0.528001	5.59993	1.94887	0.162709	0.999956
Bcl3	-0.326703	0.512578	0.0763408	0.782319	0.999956
Bcl6	0.410896	6.46828	2.04859	0.152348	0.999956
Bcl6b	-1.46193	1.14424	2.306	0.128876	0.999956
Bcl7a	-0.141524	5.64019	0.200133	0.654614	0.999956
Bcl7b	0.0748832	3.79305	0.0316055	0.858896	0.999956
Bcl7c	-0.219332	0.106932	0.0172192	0.8956	0.999956
Bcl9	0.587766	4.1558	2.01748	0.155497	0.999956
Bcl9l	0.291323	5.40977	0.978119	0.322664	0.999956
Bclaf1	0.118977	8.33045	0.294174	0.587558	0.999956
Bco2	1.67815	0.953323	2.16307	0.141362	0.999956
Bcor	-0.0226851	4.32291	0.00394907	0.949893	0.999956
Bcorl1	0.195387	4.14276	0.264605	0.606974	0.999956
Bcr	0.106463	6.47271	0.227236	0.633581	0.999956
Bcs1l	0.220675	4.69577	0.552272	0.457391	0.999956
Bdh1	-0.344778	6.32976	2.70349	0.100129	0.999956
Bdh2	0.453455	2.12734	0.448141	0.503219	0.999956
Bdnf	-0.374967	6.50239	1.25565	0.262476	0.999956
Bdp1	0.00225761	5.0181	5.59605e-05	0.994031	0.999956
Bean1	0.160148	3.41738	0.0875003	0.767379	0.999956
Becn1	-0.109485	7.43715	0.212703	0.644657	0.999956
Begain	0.307086	4.84565	0.82617	0.363382	0.999956
Bend3	0.0919294	1.07127	0.00957021	0.922069	0.999956
Bend4	-0.54505	3.05709	1.27225	0.259345	0.999956
Bend5	-0.0409362	3.32993	0.0121836	0.912109	0.999956
Bend6	-0.0918936	7.55779	0.109601	0.740599	0.999956
Bend7	1.00406	0.626821	0.933419	0.333976	0.999956
Best1	1.49179	0.130148	1.66263	0.197249	0.999956
Bet1	0.0536263	3.56271	0.00958493	0.92201	0.999956
Bet1l	-0.0402605	6.2249	0.0308778	0.860513	0.999956
Bex1	-0.0482854	6.81219	0.0292781	0.864139	0.999956
Bex2	-0.130179	8.77362	0.377273	0.539067	0.999956
Bex4	0.242599	4.46413	0.287913	0.591561	0.999956
Bfar	0.343359	6.92925	2.71484	0.0994187	0.999956
Bfsp1	0.922851	0.376228	0.831286	0.361901	0.999956
Bfsp2	0.503971	1.29778	0.346881	0.555884	0.999956
Bgn	0.354742	4.04588	0.725755	0.394263	0.999956
Bhlha9	-0.305663	3.06369	0.36224	0.547265	0.999956
Bhlhb9	0.0206559	5.88876	0.00799188	0.928766	0.999956
Bhlhe22	0.187347	8.37102	0.50661	0.47661	0.999956
Bhlhe40	0.115497	7.05531	0.171687	0.678617	0.999956
Bhlhe41	-0.0513734	6.19666	0.0279318	0.867269	0.999956
Bicc1	1.33843	1.77048	2.40217	0.121167	0.999956
Bicd1	0.0438395	6.17462	0.0414003	0.838767	0.999956
Bicd2	0.0163607	5.27365	0.00499503	0.943656	0.999956
Bid	-0.215102	4.3386	0.567577	0.451223	0.999956
Bin1	0.196363	6.56991	0.612947	0.43368	0.999956
Bin2	-0.502307	2.31858	0.601133	0.438146	0.999956
Bin3	0.513073	2.24619	0.792975	0.373202	0.999956
Birc2	0.246104	5.6548	0.573576	0.448841	0.999956
Birc3	-1.53961	0.582727	1.50602	0.219748	0.999956
Birc5	-0.0288181	3.01972	0.00258467	0.959453	0.999956
Birc6	0.0459482	6.3145	0.0365708	0.848341	0.999956
Bivm	-0.268897	4.44099	0.52635	0.468146	0.999956
Blcap	-0.355746	6.85104	1.75339	0.185451	0.999956
Blm	0.164555	1.54183	0.0647223	0.799182	0.999956
Blmh	0.0701303	6.70716	0.0638875	0.800454	0.999956
Blnk	-0.164952	2.70419	0.101186	0.75041	0.999956
Bloc1s1	0.0902641	4.63865	0.100481	0.751253	0.999956
Bloc1s2	0.0105695	3.81298	0.000819266	0.977165	0.999956
Bloc1s3	0.0111817	3.38766	0.000277731	0.986704	0.999956
Bloc1s4	0.158984	6.00076	0.453649	0.500607	0.999956
Bloc1s5	-0.577388	4.36169	2.64557	0.103839	0.999956
Bloc1s6	-0.434626	4.13758	2.14002	0.1435	0.999956
Blvra	0.18212	4.39398	0.35697	0.550194	0.999956
Blvrb	0.274666	2.68346	0.266844	0.605456	0.999956
Blzf1	-0.26869	4.85588	0.849941	0.356569	0.999956
Bmf	-0.404547	1.75323	0.344357	0.557325	0.999956
Bmi1	-0.122896	5.63962	0.140109	0.708173	0.999956
Bmp1	-0.383599	4.55088	1.16201	0.281049	0.999956
Bmp2	-0.389131	3.34279	0.811569	0.367657	0.999956
Bmp2k	0.311588	1.49828	0.125323	0.723332	0.999956
Bmp3	-2.99678	0.16497	4.47787	0.0343365	0.999956
Bmp4	0.892271	3.06688	2.36801	0.123845	0.999956
Bmp7	0.0153565	3.31822	0.000537914	0.981496	0.999956
Bmper	0.657089	2.51632	1.03137	0.309837	0.999956
Bmpr1a	0.0953198	4.87745	0.124757	0.723931	0.999956
Bmpr1b	0.219318	4.3095	0.546544	0.459733	0.999956
Bmpr2	0.008342	8.28154	0.00194374	0.964834	0.999956
Bms1	0.247704	5.57496	0.807473	0.368868	0.999956
Bmx	0.0890457	0.578168	0.00706993	0.932991	0.999956
Bmyc	-0.287622	5.62518	1.04425	0.306834	0.999956
Bnip1	-0.888952	3.22497	4.16502	0.0412669	0.999956
Bnip2	-0.0109921	6.15037	0.00265961	0.95887	0.999956
Bnip3	0.176152	7.38012	0.715405	0.397655	0.999956
Bnip3l	0.314119	5.75558	1.5329	0.215678	0.999956
Boc	-0.662434	3.34421	1.99455	0.157866	0.999956
Bod1	0.076524	7.31988	0.107839	0.742618	0.999956
Bod1l	0.257726	6.55869	1.11349	0.291325	0.999956
Bok	0.491588	5.2475	1.58069	0.208661	0.999956
Bola1	0.161356	4.47744	0.302252	0.582474	0.999956
Bola2	-0.13837	5.41454	0.336124	0.562075	0.999956
Bola3	0.198388	4.801	0.279151	0.597258	0.999956
Bop1	0.0359159	3.43645	0.00555107	0.940608	0.999956
Bpgm	-0.150499	6.08331	0.360077	0.548463	0.999956
Bphl	0.0773707	4.1119	0.0629589	0.801879	0.999956
Bpnt1	-0.0801557	6.21886	0.0344542	0.852744	0.999956
Bptf	0.0210259	8.01002	0.0118124	0.913452	0.999956
Braf	0.184138	7.23922	0.587481	0.443395	0.999956
Brap	-0.135088	4.86807	0.219418	0.639483	0.999956
Brat1	-0.279205	2.24576	0.0860321	0.769283	0.999956
Brca1	-0.12749	0.951985	0.0246141	0.875332	0.999956
Brca2	-0.278723	2.0297	0.222504	0.637139	0.999956
Brcc3	-0.0377132	4.58539	0.0170508	0.896109	0.999956
Brd1	0.0153337	6.16967	0.00276222	0.958085	0.999956
Brd2	-0.21277	8.55002	0.582344	0.445395	0.999956
Brd3	0.161054	6.78343	0.709571	0.399586	0.999956
Brd4	-0.175269	6.14561	0.395266	0.529544	0.999956
Brd7	0.298864	6.27289	1.26543	0.260626	0.999956
Brd8	0.0376381	6.31554	0.0282559	0.866509	0.999956
Brd9	0.0622933	7.43966	0.0693126	0.79234	0.999956
Brdt	-0.231227	4.75005	0.619912	0.43108	0.999956
Bre	-0.158393	1.47552	0.0415066	0.838563	0.999956
Brf1	-0.289578	5.01533	1.08558	0.297453	0.999956
Brf2	-0.376893	2.88264	0.437737	0.508217	0.999956
Bri3	-0.479216	4.25139	2.20325	0.13772	0.999956
Bri3bp	-0.308976	7.37692	2.15741	0.141884	0.999956
Brinp1	-0.184342	8.57415	0.789724	0.374184	0.999956
Brinp2	0.281753	4.88851	0.571493	0.449666	0.999956
Brinp3	-0.238675	6.17366	0.10946	0.74076	0.999956
Brip1os	-0.535929	3.4301	1.61748	0.203444	0.999956
Brix1	0.453389	5.1032	2.84838	0.0914662	0.999956
Brk1	-0.171066	6.96449	0.672324	0.412243	0.999956
Brms1	0.670835	1.27123	0.661983	0.415861	0.999956
Brms1l	0.303012	4.65349	1.05158	0.305143	0.999956
Brox	0.132936	5.42214	0.351989	0.552989	0.999956
Brpf1	-0.146345	5.28194	0.236162	0.626992	0.999956
Brpf3	-0.214416	4.50524	0.344818	0.557061	0.999956
Brsk1	-0.320363	7.07394	1.65184	0.198709	0.999956
Brsk2	-0.390814	6.30373	2.90211	0.0884635	0.999956
Brwd1	0.23903	6.71103	1.01472	0.313774	0.999956
Brwd3	0.992747	3.11565	4.92873	0.0264137	0.999956
Bscl2	0.213109	4.85819	0.707136	0.400396	0.999956
Bsdc1	-0.255706	3.94238	0.262926	0.608117	0.999956
Bsg	0.168701	7.36673	0.512871	0.473899	0.999956
Bsn	-0.0999378	7.59723	0.0890037	0.765448	0.999956
Bst2	-0.0867972	3.61521	0.0278069	0.867564	0.999956
Btaf1	0.484327	4.27643	2.13752	0.143734	0.999956
Btbd1	-0.320777	5.76022	0.848131	0.357082	0.999956
Btbd10	-0.0778981	7.18795	0.0541537	0.815987	0.999956
Btbd11	-0.278545	3.90567	0.49579	0.481356	0.999956
Btbd16	1.82165	1.10508	4.28847	0.0383717	0.999956
Btbd17	-0.745033	5.32273	5.07115	0.0243272	0.999956
Btbd19	0.181401	3.24555	0.132036	0.716331	0.999956
Btbd2	-0.0618634	4.11413	0.0299182	0.862676	0.999956
Btbd3	-0.350442	6.36321	1.27941	0.258009	0.999956
Btbd6	-0.0470791	3.46935	0.0126768	0.910355	0.999956
Btbd7	0.465955	0.900931	0.176604	0.674308	0.999956
Btbd9	-0.0719385	7.59774	0.0687179	0.793213	0.999956
Btc	1.23408	-0.0312427	0.505332	0.477166	0.999956
Btd	-0.538381	2.83979	0.864459	0.352494	0.999956
Btf3	-0.125711	5.32005	0.187431	0.665064	0.999956
Btf3l4	-0.449241	5.3965	2.60334	0.106639	0.999956
Btg1	0.963982	5.86937	2.37329	0.123427	0.999956
[truncated: 11,876 more rows]

## Sheet: GSEA genes
	SIZE	ES	NES	NOM p-val	FDR q-val	FWER p-val	RANK AT MAX LEADING EDGE
GOBP_DNA_DAMAGE_RESPONSE	32	0.288938	1.1286	0.286842	1	0.53	120
GOBP_REGULATION_OF_PROGRAMMED_CELL_DEATH	38	0.264321	1.08204	0.315789	0.680178	0.601	162
GOBP_REGULATION_OF_RESPONSE_TO_STRESS	38	0.231947	0.964815	0.521472	0.659619	0.742	72
GOBP_REGULATION_OF_INFLAMMATORY_RESPONSE	15	0.286472	0.90045	0.586698	0.586698	0.247	68
GOBP_LIPID_BIOSYNTHETIC_PROCESS	20	0.243	0.871731	0.645078	0.642212	0.847	48
GOBP_REGULATION_OF_NEUROGENESIS	19	-0.274294	-0.850739	0.659396	0.66772	0.983	34
GOBP_POSITIVE_REGULATION_OF_CELL_DIFFERENTIATION	32	-0.418485	-1.49939	0.046875	0.0740884	0.208	55
GOBP_WNT_SIGNALING_PATHWAY	18	-0.545077	-1.64615	0.02589	0.0659088	0.095	94
GOBP_DNA_DAMAGE_RESPONSE
NAME	SYMBOL	RANK IN GENE LIST	RANK METRIC SCORE	RUNNING ES	CORE ENRICHMENT
row_0	Supt20	41	2.13403	-0.0164057	Yes
row_1	Rfc4	45	2.07139	0.0385692	Yes
row_2	Spidr	55	1.88566	0.0765356	Yes
row_3	Zbtb38	62	1.79587	0.117649	Yes
row_4	Top2a	77	1.59489	0.137453	Yes
row_5	Hipk2	84	1.49561	0.169759	Yes
row_6	Polg2	90	1.45423	0.202779	Yes
row_7	Zbtb40	112	1.18568	0.197093	Yes
row_8	Sgk1	116	1.16149	0.22538	Yes
row_9	Mcrs1	119	1.15235	0.255326	Yes
row_10	Crip1	120	1.14599	0.288938	Yes
GOBP_REGULATION_OF_PROGRAMMED_CELL_DEATH
NAME	SYMBOL	RANK IN GENE LIST	RANK METRIC SCORE	RUNNING ES	CORE ENRICHMENT
row_0	Bcl2l15	15	3.05486	0.0409509	Yes
row_1	Anxa1	19	2.91298	0.102034	Yes
row_2	Ctsk	59	1.80796	0.0675514	Yes
row_3	Rorc	61	1.80088	0.10698	Yes
row_4	Top2a	77	1.59489	0.114386	Yes
row_5	Hipk2	84	1.49561	0.137054	Yes
row_6	Txnip	91	1.4419	0.158489	Yes
row_7	Tsc22d3	93	1.40936	0.188922	Yes
row_8	Ramp2	102	1.26533	0.2024	Yes
row_9	Prodh	107	1.22922	0.222847	Yes
row_10	Sgk1	116	1.16149	0.233939	Yes
row_11	Nfe2l2	138	1.04559	0.217028	Yes
row_12	Sgk3	142	1.02226	0.234668	Yes
row_13	Casp6	153	0.954666	0.23711	Yes
row_14	Prkcq	159	0.901607	0.24808	Yes
row_15	Zbtb16	162	0.876534	0.264321	Yes
GOBP_REGULATION_OF_RESPONSE_TO_STRESS
NAME	SYMBOL	RANK IN GENE LIST	RANK METRIC SCORE	RUNNING ES	CORE ENRICHMENT
row_0	Ptpn22	16	3.04327	0.0306581	Yes
row_1	Anxa1	19	2.91298	0.0859589	Yes
row_2	Pglyrp1	32	2.38575	0.111052	Yes
row_3	Supt20	41	2.13403	0.138826	Yes
row_4	Spidr	55	1.88566	0.151807	Yes
row_5	Dusp10	63	1.79341	0.174608	Yes
row_6	Shpk	68	1.76201	0.20262	Yes
row_7	Wdfy1	72	1.73086	0.231947	Yes
GOBP_LIPID_BIOSYNTHETIC_PROCESS
NAME	SYMBOL	RANK IN GENE LIST	RANK METRIC SCORE	RUNNING ES	CORE ENRICHMENT
row_0	Fgf7	8	3.47645	0.121239	Yes
row_1	Anxa1	19	2.91298	0.216619	Yes
row_2	Lpin3	48	2.01775	0.243	Yes
GOBP_REGULATION_OF_INFLAMMATORY_RESPONSE
NAME	SYMBOL	TITLE	RANK IN GENE LIST	RANK METRIC SCORE	RUNNING ES	CORE ENRICHMENT
row_0	Anxa1	annexin A1 [Source:MGI Symbol;Acc:MGI:96819]	19	2.91298	0.0987648	Yes
row_1	Pglyrp1	peptidoglycan recognition protein 1 [Source:MGI Symbol;Acc:MGI:1345092]	32	2.38575	0.186398	Yes
row_2	Dusp10	dual specificity phosphatase 10 [Source:MGI Symbol;Acc:MGI:1927070]	63	1.79341	0.21254	Yes
row_3	Shpk	sedoheptulokinase [Source:MGI Symbol;Acc:MGI:1921887]	68	1.76201	0.286472	Yes
GOBP_WNT_SIGNALING_PATHWAY
NAME	SYMBOL	RANK IN GENE LIST	RANK METRIC SCORE	RUNNING ES	CORE ENRICHMENT
row_12	Fzd9	458	-1.48279	-0.492903	Yes
row_13	Ccnyl1	462	-1.50517	-0.44557	Yes
row_14	Gli1	474	-1.74455	-0.404824	Yes
row_15	Tmem88	517	-2.94434	-0.380022	Yes
row_16	Fzd10	534	-5.16072	-0.228454	Yes
row_17	Ror2	550	-7.29248	-8.3819e-09	Yes
GOBP_POSITIVE_REGULATION_OF_CELL_DIFFERENTIATION
NAME	SYMBOL	RANK IN GENE LIST	RANK METRIC SCORE	RUNNING ES	CORE ENRICHMENT
row_25	Nfkbid	497	-2.24454	-0.376373	Yes
row_26	Sash3	511	-2.75173	-0.349793	Yes
row_27	Ngfr	512	-2.76789	-0.297862	Yes
row_28	Shank3	518	-2.97608	-0.251659	Yes
row_29	Asb4	521	-3.10318	-0.197291	Yes
row_30	Shox2	545	-5.99578	-0.129114	Yes
row_31	Ror2	550	-7.29248	-1.02678e-07	Yes
GOBP_REGULATION_OF_NEUROGENESIS
NAME	SYMBOL	RANK IN GENE LIST	RANK METRIC SCORE	RUNNING ES	CORE ENRICHMENT
row_15	Sema4f	452	-1.43004	-0.209137	Yes
row_16	Hes5	460	-1.48768	-0.167151	Yes
row_17	Shank3	518	-2.97608	-0.163978	Yes
row_18	Shox2	545	-5.99578	0.00939847	Yes
